# Supplementary material for: Two- and three-dimensional β,β′-N-heterocycle fused porphyrins: concise construction, singlet oxygen production and electro-catalytic hydrogen evolution reaction
Source: Royal Society of Chemistry journal article supplement (doi:10.1039/d1qo01161h), 2021-01-01
Supplement: d1qo01161h1.pdf [file d1qo01161h1.pdf]

## Supporting Information

### Two- and three-dimensional $\beta,\beta'$ -*N*-heterocycle fused porphyrins: concise construction, singlet oxygen production and electrocatalytic hydrogen evolution reaction

Yan Fan,<sup>a</sup> Zhiming Zeng,<sup>a</sup> Hui Shu,<sup>a</sup> Mingbo Zhou,<sup>\*a</sup> Ling Xu,<sup>a</sup> Yutao, Rao,<sup>a</sup> Tingting Gu,<sup>b</sup> Xu Liang,<sup>b</sup> Weihua Zhu,<sup>b</sup> and Jianxin Song<sup>\*a</sup>

<sup>a</sup> Key Laboratory of Chemical Biology & Traditional Chinese Medicine Research (Ministry of Education), Key Laboratory of the Assembly and Application of Organic Functional Molecules of Hunan Province, Hunan Normal University, Changsha 410081, P. R. China.

E-mail: zhoumingbo@hnnu.edu.cn and jxsong@hnnu.edu.cn

<sup>b</sup> School of Chemistry and Chemical Engineering, Jiangsu University, Zhenjiang 212013, P. R. China

#### Table of Contents

|                                                    |     |
|----------------------------------------------------|-----|
| Instrumentation and Materials.....                 | S2  |
| General Procedures.....                            | S2  |
| Compound Data.....                                 | S8  |
| NMR Spectra of Compounds.....                      | S14 |
| UV/Vis Absorption Spectra.....                     | S31 |
| Electrochemical Data.....                          | S35 |
| X-Ray Crystal Data.....                            | S40 |
| DFT Calculations.....                              | S55 |
| Singlet Oxygen Production.....                     | S71 |
| Electrocatalytic Hydrogen Evolution Reaction ..... | S73 |
| References.....                                    | S75 |

## Instrumentation and Materials

$^1\text{H}$  NMR (500 MHz) and  $^{13}\text{C}$  NMR (126 MHz) spectra were taken on a Bruker AVANCE-500 spectrometer, and chemical shifts were reported as the delta scale in ppm. The residual peak of  $\text{CDCl}_3$  was used as internal reference for  $^1\text{H}$  NMR ( $\delta = 7.26$  ppm) and the solvent  $\text{CDCl}_3$  was used as internal reference for  $^{13}\text{C}$  NMR ( $\delta = 77.0$  ppm). UV/Vis absorption spectra were recorded on a Shimadzu UV-3600 spectrometer. MALDI-TOF mass spectra were obtained with a Bruker ultrafle Xtreme MALDI-TOF/TOF spectrometer with matrix. X-Ray data were taken on a Bruker SMART APEX X-Ray diffractometer equipped with a large area CCD detector. Cyclic voltammetry was performed in a three-electrode cell using the Chi-730D electrochemistry station. Compounds **1M-2Br**, **1M-4Br**, **1M-8Br** and **2c-2f** were prepared according to the literature procedure<sup>[S1, S2]</sup>. Unless otherwise noted, materials obtained from commercial suppliers were used without further purification.

## General Procedures

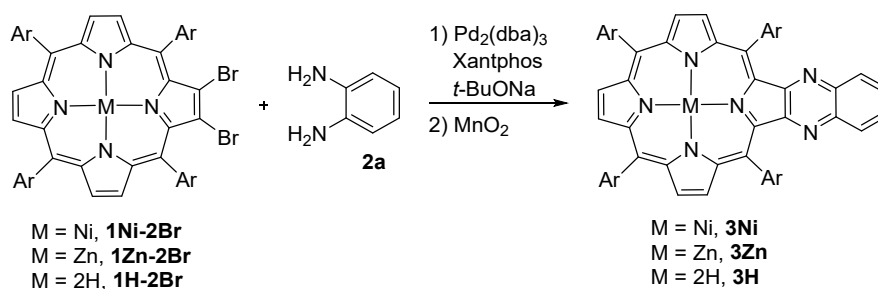

**Synthesis of 3Ni, 3Zn, 3H:** A *p*-Xylene solution (3 mL) of **1M-2Br** (0.05 mmol),  $\text{Pd}_2(\text{dba})_3$  (9.2 mg, 0.01 mmol), Xantphos (11.6 mg, 0.02 mmol), 1,2-diaminobenzene **2a** (5.4 mg, 0.05 mmol), *t*-BuONa (28.8 mg, 0.3 mmol) was degassed through three freeze-pump-thaw cycles, and the reaction flask was purged with argon. The resulting mixture was stirred at reflux for 48 h. Then the reaction mixture was diluted with  $\text{CHCl}_3$ , washed with water, and dried over anhydrous sodium sulfate. After removal of the solvent in vacuo, the residue of the reaction was dissolved in  $\text{CH}_2\text{Cl}_2$  (20 mL). Then,  $\text{MnO}_2$  (173.9 mg, 2.0 mmol) was added to the solution. After stirring at room temperature for 4 h, the reaction mixture was passed through short Celite® pad to remove the solids of  $\text{MnO}_2$ , concentrated in vacuo, and purified by silica gel column chromatography eluting with  $\text{CH}_2\text{Cl}_2$ /hexane. Recrystallization from  $\text{CH}_2\text{Cl}_2$ /MeOH afforded **3Ni** (38.3 mg, 0.03 mmol, 63% yield), **3Zn** (17.2 mg, 0.014 mmol, 28% yield) and **3H** (15.2 mg, 0.013 mmol, 26% yield), respectively.

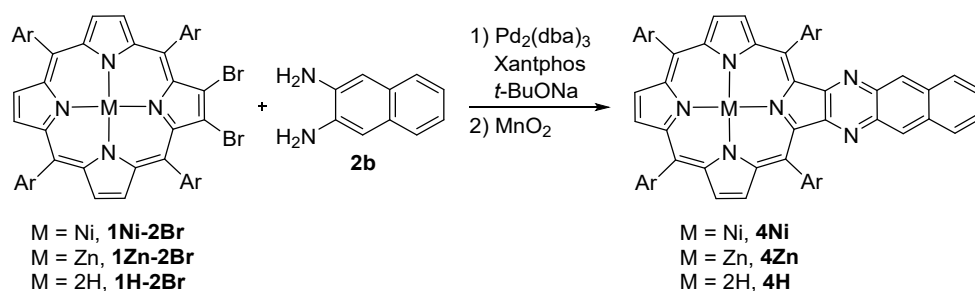

**Synthesis of 4Ni, 4Zn, 4H:** Replacing **2a** with **2b** (7.9 mg, 0.05 mmol), the procedures of synthesis of **4Ni**, **4Zn**, **4H** are the same with that of synthesis of **3Ni**. Recrystallization from  $\text{CH}_2\text{Cl}_2/\text{MeOH}$  afforded **4Ni** (24.2 mg, 0.019 mmol, 38% yield), **4Zn** (7.0 mg, 0.0055 mmol, 11% yield) and **4H** (3.7 mg, 0.003 mmol, 6% yield), respectively.

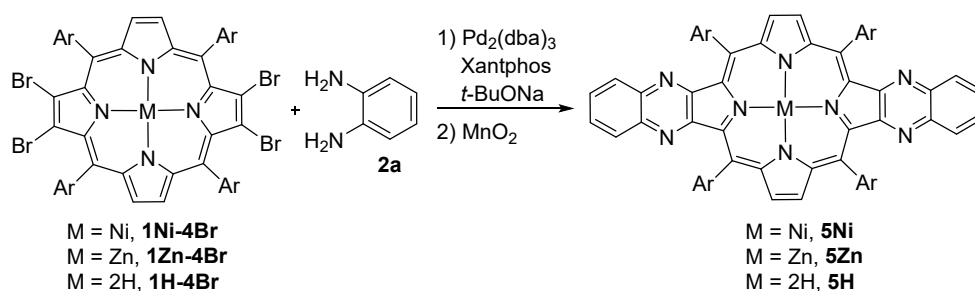

**Synthesis of 5Ni, 5Zn, 5H:** A *p*-Xylene solution (3 mL) of **1M-4Br** (0.05 mmol),  $\text{Pd}_2(\text{dba})_3$  (9.2 mg, 0.01 mmol), Xantphos (11.6 mg, 0.02 mmol), 1,2-diaminobenzene **2a** (9.7 mg, 0.09 mmol), *t*-BuONa (28.8 mg, 0.3 mmol) was degassed through three freeze-pump-thaw cycles, and the reaction flask was purged with argon. The resulting mixture was stirred at reflux for 48 h. Then the reaction mixture was diluted with  $\text{CHCl}_3$ , washed with water, and dried over anhydrous sodium sulfate. After removal of the solvent in vacuo, the residue of the reaction was dissolved in  $\text{CH}_2\text{Cl}_2$  (20 mL). Then,  $\text{MnO}_2$  (173.9 mg, 2.0 mmol) was added to the solution. After stirring at room temperature for 4 h, the reaction mixture was passed through short Celite® pad to remove the solids of  $\text{MnO}_2$ , concentrated in vacuo, and purified by silica gel column chromatography eluting with  $\text{CH}_2\text{Cl}_2/\text{hexane}$ . Recrystallization from  $\text{CH}_2\text{Cl}_2/\text{MeOH}$  afforded **5Ni** (22.1 mg, 0.017 mmol, 37% yield), **5Zn** (19.2 mg, 0.014 mmol, 32% yield), **5H** (10.3 mg, 0.0081 mmol, 18% yield), respectively.

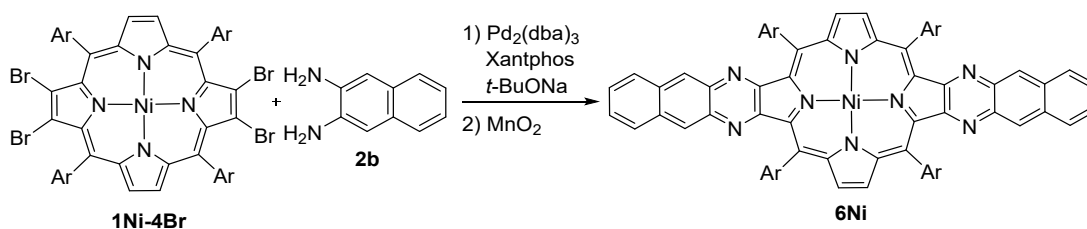

**Synthesis of 6Ni:** Replacing **2a** with **2b** (14.2 mg, 0.09 mmol), the procedures of synthesis of **6Ni** is the same with that of synthesis of **5Ni**. Recrystallization from CH<sub>2</sub>Cl<sub>2</sub>/MeOH afforded **6Ni** (11.5 mg, 0.0081 mmol, 18% yield).

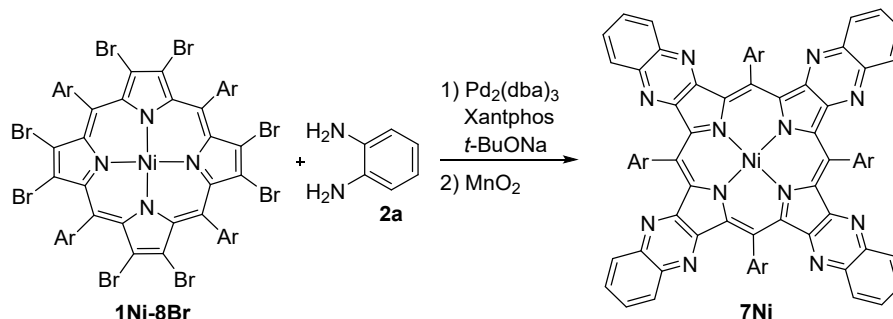

**Synthesis of 7Ni:** A *p*-Xylene solution (3 mL) of **1Ni-8Br** (87.7 mg, 0.05 mmol), Pd<sub>2</sub>(dba)<sub>3</sub> (9.2 mg, 0.01 mmol), Xantphos (11.6 mg, 0.02 mmol), 1,2-diaminobenzene **2a** (19.5 mg, 0.18 mmol), *t*-BuONa (57.7 mg, 0.6 mmol) was degassed through three freeze-pump-thaw cycles, and the reaction flask was purged with argon. The resulting mixture was stirred at reflux for 48 h. Then the reaction mixture was diluted with CHCl<sub>3</sub>, washed with water, and dried over anhydrous sodium sulfate. After removal of the solvent in vacuo, the residue of the reaction was dissolved in CH<sub>2</sub>Cl<sub>2</sub> (20 mL). Then, MnO<sub>2</sub> (173.9 mg, 2.0 mmol) was added to the solution. After stirring at room temperature for 4 h, the reaction mixture was passed through short Celite® pad to remove the solids of MnO<sub>2</sub>, concentrated in vacuo, and purified by silica gel column chromatography eluting with CH<sub>2</sub>Cl<sub>2</sub>/hexane. Recrystallization from CH<sub>2</sub>Cl<sub>2</sub>/MeOH afforded **7Ni** (17.2 mg, 0.011 mmol, 25% yield).

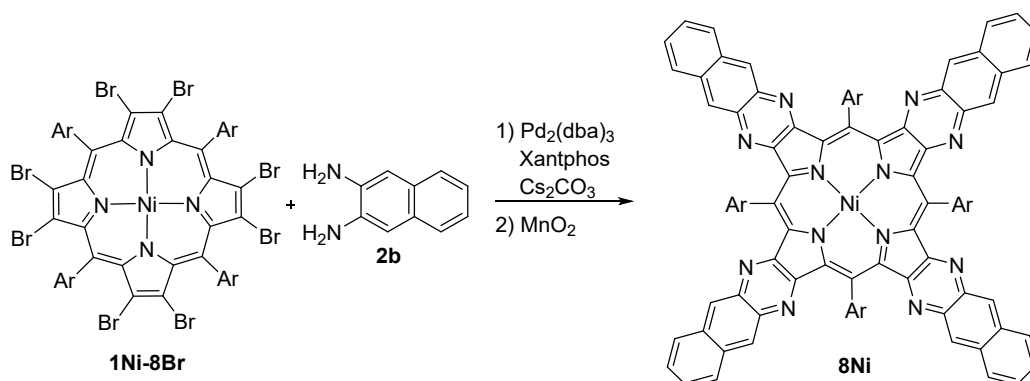

**Synthesis of 8Ni:** Replacing **2a** with **2b** (28.4mg, 0.18 mmol), the procedure of synthesis of **8Ni** is the same with that of synthesis of **7Ni**. Recrystallization from CH<sub>2</sub>Cl<sub>2</sub>/MeOH afforded **8Ni** (6.2 mg, 0.0036 mmol, 8% yield).

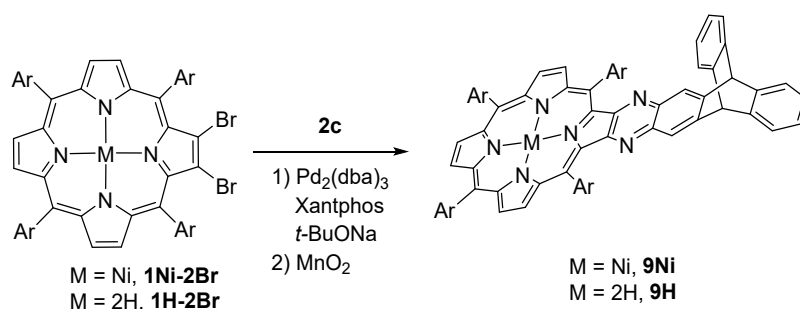

**Synthesis of 9Ni:** A *p*-Xylene solution (3 mL) of **1Ni-2Br** (64.0 mg, 0.05 mmol), Pd<sub>2</sub>(dba)<sub>3</sub> (9.2 mg, 0.01 mmol), Xantphos (11.6 mg, 0.02 mmol), **2c** (14.2 mg, 0.05 mmol), *t*-BuONa (28.8 mg, 0.3 mmol), was degassed through three freeze-pump-thaw cycles, and the reaction flask was purged with argon. The resulting mixture was stirred at reflux for 48 h. Then the reaction mixture was diluted with CHCl<sub>3</sub>, washed with water, and dried over anhydrous sodium sulfate. After removal of the solvent in vacuo, the residue of the reaction was dissolved in CH<sub>2</sub>Cl<sub>2</sub> (20 mL). Then, MnO<sub>2</sub> (173.9 mg, 2.0 mmol) was added to the solution. After stirring at room temperature for 4 h, the reaction mixture was passed through short Celite® pad to remove the solids of MnO<sub>2</sub>, concentrated in vacuo, and purified by silica gel column chromatography eluting with CH<sub>2</sub>Cl<sub>2</sub>/hexane. Recrystallization from CH<sub>2</sub>Cl<sub>2</sub>/MeOH afforded **9Ni** (49.3 mg, 0.035 mmol, 70% yield).

**Synthesis of 9H:** **9Ni** (15.6 mg, 0.011 mmol) was dissolved in CH<sub>2</sub>Cl<sub>2</sub> (10 mL) and concentrated sulfuric acid (0.4 mL) was added. After stirring at room temperature for 6 h, the reaction mixture was washed with water, Na<sub>2</sub>CO<sub>3</sub> aq., and water. The crude product was extracted with CH<sub>2</sub>Cl<sub>2</sub>, and the organic extract was dried over anhydrous sodium sulfate. Evaporation of the solvent followed by silica-gel column chromatography (CH<sub>2</sub>Cl<sub>2</sub>/hexane as an eluent) and recrystallization with CH<sub>2</sub>Cl<sub>2</sub>/MeOH provided **9H** (14.2 mg, 0.011 mmol, 95% yield).

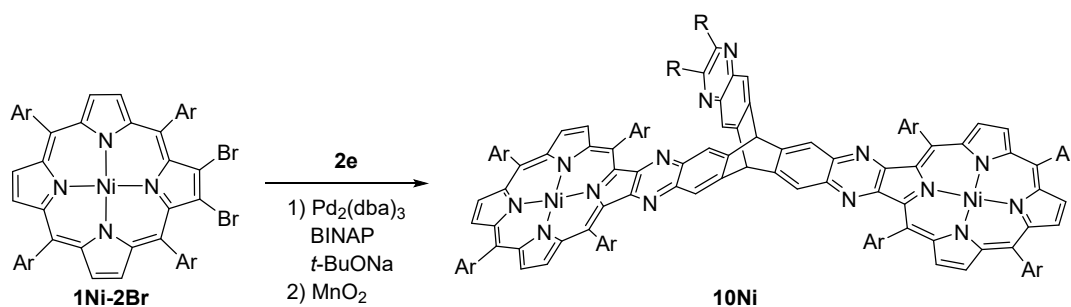

**Synthesis of 10Ni:** A *p*-Xylene solution (3 mL) of **1Ni-2Br** (64.0 mg, 0.05 mmol), Pd<sub>2</sub>(dba)<sub>3</sub> (9.2 mg, 0.01 mmol), BINAP (12.5 mg, 0.02 mmol), **2e** (14.5 mg, 0.025 mmol), *t*-BuONa (57.7 mg, 0.6 mmol) was degassed through three freeze-pump-thaw cycles, and the reaction flask was purged with argon. The resulting mixture was stirred at reflux for 48 h. Then the reaction mixture was diluted with CHCl<sub>3</sub>, washed with water, and dried over anhydrous sodium sulfate. After stirring at room temperature for 4 h, the reaction mixture was passed through short Celite® pad to remove the solids of MnO<sub>2</sub>, concentrated in vacuo, and purified by silica gel column chromatography eluting with CH<sub>2</sub>Cl<sub>2</sub>/hexane. Recrystallization from CH<sub>2</sub>Cl<sub>2</sub>/MeOH afforded **10Ni** (15.4 mg, 0.0055 mmol, 22% yield).

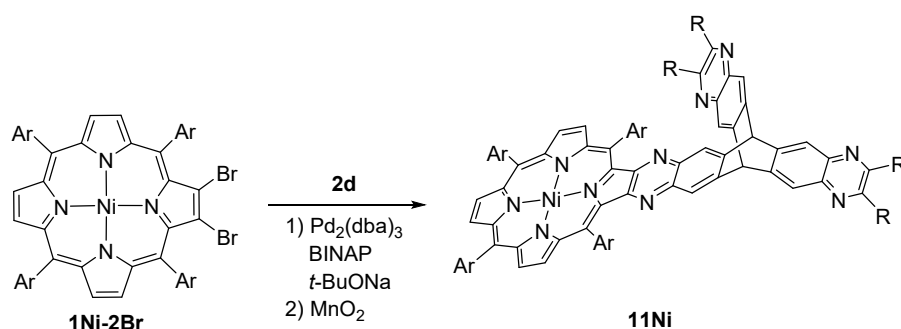

**Synthesis of 11Ni:** A *p*-Xylene solution (3 mL) of **1Ni-2Br** (64.0 mg, 0.05 mmol), Pd<sub>2</sub>(dba)<sub>3</sub> (9.2 mg, 0.01 mmol), BINAP (12.5 mg, 0.02 mmol), **2d** (40.7 mg, 0.05 mmol), *t*-BuONa (28.8 mg, 0.3 mmol) was degassed through three freeze-pump-thaw cycles, and the reaction flask was purged with argon. The resulting mixture was stirred at reflux for 48 h. Then the reaction mixture was diluted with CHCl<sub>3</sub>, washed with water, and dried over anhydrous sodium sulfate. After stirring at room temperature for 4 h, the reaction mixture was passed through short Celite® pad to remove the solids of MnO<sub>2</sub>, concentrated in vacuo, and purified by silica gel column chromatography eluting with CH<sub>2</sub>Cl<sub>2</sub>/hexane. Recrystallization from CH<sub>2</sub>Cl<sub>2</sub>/MeOH afforded **11Ni** (20.2 mg, 0.011 mmol, 21% yield).

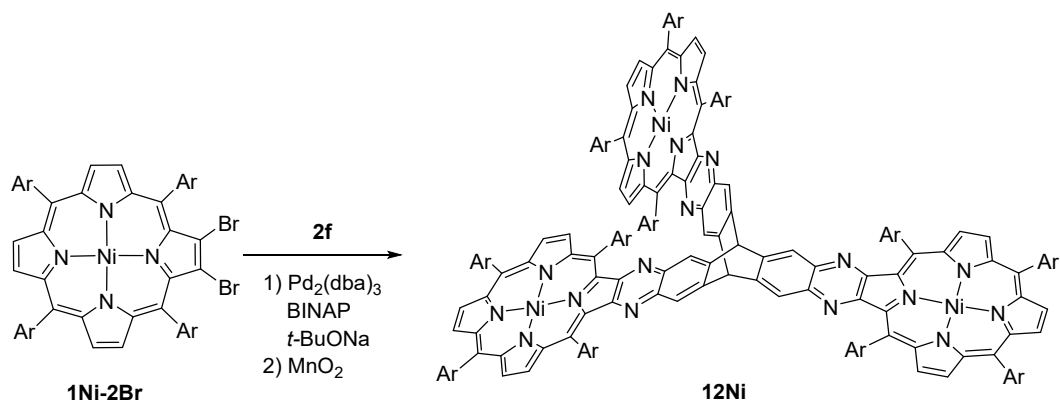

**Synthesis of 12Ni:** A *p*-Xylene solution (3 mL) of **1Ni-2Br** (64.0 mg, 0.05 mmol),  $\text{Pd}_2(\text{dba})_3$  (9.2 mg, 0.01 mmol), BINAP (12.5 mg, 0.02 mmol), **2f** (17.7 mg, 0.025 mmol), *t*-BuONa (57.7 mg, 0.6 mmol), triethylamine (0.1 mL) was degassed through three freeze-pump-thaw cycles, and the reaction flask was purged with argon. The resulting mixture was stirred at reflux for 48 h. Then the reaction mixture was diluted with  $\text{CHCl}_3$ , washed with water, and dried over anhydrous sodium sulfate. After stirring at room temperature for 4 h, the reaction mixture was passed through short Celite® pad to remove the solids of  $\text{MnO}_2$ , concentrated in vacuo, and purified by silica gel column chromatography eluting with  $\text{CH}_2\text{Cl}_2$ /hexane. Recrystallization from  $\text{CH}_2\text{Cl}_2$ /MeOH afforded **12Ni** (6.8 mg, 0.0018 mmol, 11% yield).

**Synthesis of 12H:** **12Ni** (15.6 mg, 0.0042 mmol) was dissolved in  $\text{CH}_2\text{Cl}_2$  (10 mL) and concentrated sulfuric acid (0.4 mL) was added. After stirring at room temperature for 6 h, the reaction mixture was washed with water,  $\text{Na}_2\text{CO}_3$  aq., and water. The crude product was extracted with  $\text{CH}_2\text{Cl}_2$ , and the organic extract was dried over anhydrous sodium sulfate. Evaporation of the solvent followed by silica-gel column chromatography ( $\text{CH}_2\text{Cl}_2$ /hexane as an eluent) and recrystallization with  $\text{CH}_2\text{Cl}_2$ /MeOH provided **12H** (11.9 mg, 0.0034 mmol, 80% yield).

**Synthesis of 12Zn:** **12H** (10 mg, 0.0075 mmol) was added to a round-bottomed 50-mL flask and dissolved in  $\text{CH}_2\text{Cl}_2$  (6 mL). An excess amount of saturated zinc(II) acetate in methanol was added. After stirring for 4 h, the complete metalation was confirmed by TLC. The reaction mixture was passed through a short silica-gel column, evaporated and recrystallized from  $\text{CH}_2\text{Cl}_2$ /MeOH to give **12Zn** (9.9 mg, 0.0071 mmol, 95%).

### Compound Data

**3Ni<sup>131</sup>**: <sup>1</sup>H NMR (500 MHz, CDCl<sub>3</sub>): δ = 8.91 (d, 2H, *J* = 4.90 Hz, β-H), 8.77 (d, 2H, *J* = 4.90 Hz, β-H), 8.68 (s, 2H, β-H), 7.84 (br, 4H, Ar-H), 7.81 (br, 4H, *quinoxaline*-H and Ar-H), 7.75 (br, 2H, *quinoxaline*-H), 7.70 (br, 6H, Ar-H), 1.46 (br, 36H, *t*-Bu-H), 1.42 (br, 36H, *t*-Bu-H) ppm; <sup>13</sup>C NMR (126 MHz, CDCl<sub>3</sub>): δ = 150.88, 149.20, 149.13, 143.92, 141.86, 141.06, 140.60, 139.37, 139.06, 133.36, 133.07, 131.65, 131.26, 130.25, 128.92, 128.30, 127.65, 122.14, 121.29, 120.77, 116.66, 35.00, 34.92, 31.79, 31.68 ppm; HR-MS (MALDI-TOF-MS): *m/z* = 1220.6861 [*M*]<sup>+</sup>, calcd for (C<sub>82</sub>H<sub>94</sub>N<sub>6</sub>Ni)<sup>+</sup> = 1220.6893; λ<sub>max</sub> (ε [M<sup>-1</sup>cm<sup>-1</sup>]) = 406 (54525), 444 (55815), 556 (6826), 600 (7396).

**3Zn<sup>131</sup>**: <sup>1</sup>H NMR (500 MHz, CDCl<sub>3</sub>): δ = 9.05 (d, 2H, *J* = 4.65 Hz, β-H), 9.00 (d, 2H, *J* = 4.65 Hz, β-H), 8.90 (s, 2H, β-H), 8.09 (d, 4H, *J* = 1.85 Hz, Ar-H), 7.96 (d, 4H, *J* = 1.85 Hz, Ar-H), 7.92 (s, 2H, Ar-H), 7.91 (dd, 2H, *J* = 6.45, 3.45 Hz, *quinoxaline*-H), 7.80 (br, 4H, Ar-H and *quinoxaline*-H), 1.53 (s, 36H, *t*-Bu-H), 1.48 (s, 36H, *t*-Bu-H) ppm; HR-MS (MALDI-TOF-MS): *m/z* = 1226.6839 [*M*]<sup>+</sup>, calcd for (C<sub>82</sub>H<sub>94</sub>N<sub>6</sub>Zn)<sup>+</sup> = 1226.6831; λ<sub>max</sub> (ε [M<sup>-1</sup>cm<sup>-1</sup>]) = 415 (75239), 440 (80714), 530 (5105), 567 (10901), 610 (9176).

**3H<sup>131</sup>**: <sup>1</sup>H NMR (500 MHz, CDCl<sub>3</sub>): δ = 9.07 (d, 2H, *J* = 4.90 Hz, β-H), 8.99 (d, 2H, *J* = 4.90 Hz, β-H), 8.79 (s, 2H, β-H), 8.10 (d, 4H, *J* = 1.85 Hz, Ar-H), 7.97 (br, 4H, Ar-H), 7.93 (s, 2H, Ar-H), 7.83 (br, 4H, Ar-H and *quinoxaline*-H), 7.74 (dd, 2H, *J* = 6.40, 3.35 Hz, *quinoxaline*-H), 1.53 (s, 36H, *t*-Bu-H), 1.48 (s, 36H, *t*-Bu-H), -2.51 (s, 2H, NH) ppm; HR-MS (MALDI-TOF-MS): *m/z* = 1164.7668 [*M*]<sup>+</sup>, calcd for (C<sub>82</sub>H<sub>96</sub>N<sub>6</sub>)<sup>+</sup> = 1164.7696; λ<sub>max</sub> (ε [M<sup>-1</sup>cm<sup>-1</sup>]) = 430 (132681), 528 (11734), 562 (4508), 597 (6396).

**4Ni**: <sup>1</sup>H NMR (500 MHz, CDCl<sub>3</sub>): δ = 8.82 (d, 2H, *J* = 4.65 Hz, β-H), 8.72 (d, 2H, *J* = 4.60 Hz, β-H), 8.63 (s, 2H, β-H), 8.40 (s, 2H, *quinoxaline*-H), 8.13 (m, 2H, *quinoxaline*-H), 7.85 (m, 6H, Ar-H and *quinoxaline*-H), 7.72 (m, 6H, Ar-H and *quinoxaline*-H), 7.56 (m, 2H, *quinoxaline*-H), 1.46 (br, 72H, *t*-Bu-H) ppm; <sup>13</sup>C NMR (126 MHz, CDCl<sub>3</sub>): δ = 151.86, 149.31, 149.14, 144.26, 144.23, 141.86, 141.84, 140.30, 139.25, 139.23, 138.95, 138.13, 133.66, 133.52, 133.14, 131.40, 131.00, 128.51, 128.32, 128.21, 127.60, 125.97, 122.63, 121.30, 120.85, 116.17, 34.99, 34.94, 31.80, 31.67 ppm; HR-MS (MALDI-TOF-MS): *m/z* =



1270.6967  $[M]^+$ , calcd for  $(C_{86}H_{96}N_6Ni)^+ = 1270.7050$ ;  $\lambda_{max}$  ( $\epsilon$   $[M^{-1}cm^{-1}]$ ) = 349 (36978), 420 (153332), 472 (59371), 634 (14488).

**4Zn**:  $^1H$  NMR (500 MHz,  $CDCl_3$ ):  $\delta = 9.01$  (d, 2H,  $J = 4.85$  Hz,  $\beta$ -H), 8.98 (d, 2H,  $J = 4.50$  Hz,  $\beta$ -H), 8.86 (s, 2H,  $\beta$ -H), 8.49 (s, 2H, *quinoxaline*-H), 8.20 (m, 2H, *quinoxaline*-H), 8.09 (d, 4H,  $J = 1.5$  Hz, Ar-H), 7.99 (s, 6H, Ar-H), 7.79 (s, 2H, Ar-H), 7.60 (m, 2H, *quinoxaline*-H), 1.53 (br, 36H, *t*-Bu-H), 1.51 (br, 36H, *t*-Bu-H) ppm;  $^{13}C$  NMR (126 MHz,  $CDCl_3$ ):  $\delta = 152.95, 151.80, 149.66, 148.97, 148.64, 142.35, 141.65, 141.49, 138.14, 133.49, 132.43, 131.44, 131.26, 129.26, 128.63, 128.60, 128.20, 125.93, 125.21, 120.93, 120.64, 118.34, 35.07, 35.03, 31.94, 31.78$  ppm; HR-MS (MALDI-TOF-MS):  $m/z = 1276.7101$   $[M]^+$ , calcd for  $(C_{86}H_{96}N_6Zn)^+ = 1276.6988$ ;  $\lambda_{max}$  ( $\epsilon$   $[M^{-1}cm^{-1}]$ ) = 395 (60291), 429 (185265), 472 (64002), 545 (10082), 587 (13829), 636 (20224).

**4H**:  $^1H$  NMR (500 MHz,  $CDCl_3$ ):  $\delta = 9.07$  (d, 2H,  $J = 4.85$  Hz,  $\beta$ -H), 8.99 (d, 2H,  $J = 4.85$  Hz,  $\beta$ -H), 8.78 (s, 2H,  $\beta$ -H), 8.42 (s, 2H, *quinoxaline*-H), 8.17 (m, 2H, *quinoxaline*-H), 8.11 (s, 4H, Ar-H), 8.01 (br, 6H, Ar-H), 7.81 (s, 2H, Ar-H), 7.58 (m, 2H, *quinoxaline*-H), 1.53 (br, 36H, *t*-Bu-H), 1.51 (br, 36H, *t*-Bu-H), -2.35 (s, 2H, NH) ppm;  $^{13}C$  NMR (126 MHz,  $CDCl_3$ ):  $\delta = 154.78, 153.51, 149.06, 148.80, 146.33, 141.10, 140.88, 139.80, 137.96, 137.92, 134.06, 133.51, 129.51, 128.71, 128.56, 128.44, 128.10, 128.01, 125.88, 123.00, 121.09, 120.88, 117.55, 35.06, 35.03, 31.91, 31.75$  ppm; HR-MS (MALDI-TOF-MS):  $m/z = 1214.7865$   $[M]^+$ , calcd for  $(C_{86}H_{98}N_6)^+ = 1214.7853$ ;  $\lambda_{max}$  ( $\epsilon$   $[M^{-1}cm^{-1}]$ ) = 430 (184363), 537 (14799), 609 (10171).

**5Ni<sup>III</sup>**:  $^1H$  NMR (500 MHz,  $CDCl_3$ ):  $\delta = 8.96$  (s, 4H,  $\beta$ -H), 7.82 (br, 8H, *quinoxaline*-H and Ar-H), 7.75 (br, 12H, *quinoxaline*-H and Ar-H), 1.43 (br, 72H, *t*-Bu-H) ppm;  $^{13}C$  NMR (125 MHz,  $CDCl_3$ ):  $\delta = 150.34, 149.31, 141.57, 141.08, 138.47, 132.36, 131.89, 130.27, 129.00, 127.53, 120.95, 118.67, 34.93, 31.77$  ppm;  $^{13}C$  NMR (126 MHz,  $CDCl_3$ ):  $\delta = 150.32, 149.28, 141.55, 141.06, 138.45, 132.34, 131.87, 130.25, 128.97, 127.51, 120.94, 118.65, 34.92, 31.77$  ppm; HR-MS (MALDI-TOF-MS):  $m/z = 1322.7009$   $[M]^+$ , calcd for  $(C_{88}H_{96}N_8Ni)^+ = 1322.7111$ ;  $\lambda_{max}$  ( $\epsilon$   $[M^{-1}cm^{-1}]$ ) = 357 (53577), 402 (49841), 461 (106709), 549 (6076), 617 (7746), 659.(16475).

**5Zn**<sup>13</sup>: <sup>1</sup>H NMR (500 MHz, CDCl<sub>3</sub>): δ = 9.12 (s, 4H, β-H), 8.00 (br, 8H, Ar-H), 7.95 (m, 8H, quinoxaline-H and Ar-H), 7.81 (br, 4H, quinoxaline-H), 1.50 (s, 72H, *t*-Bu-H) ppm; HR-MS (MALDI-TOF-MS): *m/z* = 1328.7080 [*M*]<sup>+</sup>, calcd for (C<sub>88</sub>H<sub>96</sub>N<sub>8</sub>Zn)<sup>+</sup> = 1328.7049; λ<sub>max</sub> (ε [M<sup>-1</sup>cm<sup>-1</sup>]) = 343 (33752), 399 (82493), 459 (153398), 551 (7480), 603 (8044), 626 (9433), 653 (34013).

**5H**<sup>13</sup>: <sup>1</sup>H NMR (500 MHz, CDCl<sub>3</sub>): δ = 9.10 (s, 4H, β-H), 8.00 (br, 8H, Ar-H), 7.95 (br, 4H, Ar-H), 7.86 (m, 4H, quinoxaline-H), 7.76 (m, 4H, quinoxaline-H), 1.50 (br, 72H, *t*-Bu-H), -2.47 (s, 2H, NH) ppm; HR-MS (MALDI-TOF-MS): *m/z* = 1266.7923 [*M*]<sup>+</sup>, calcd for (C<sub>88</sub>H<sub>98</sub>N<sub>8</sub>)<sup>+</sup> = 1266.7914; λ<sub>max</sub> (ε [M<sup>-1</sup>cm<sup>-1</sup>]) = 347 (33609), 445 (219791), 532 (19851), 612 (9962), 667 (8269).

**6Ni**: <sup>1</sup>H NMR (500 MHz, CDCl<sub>3</sub>): δ = 8.90 (s, 4H, β-H), 8.44 (br, 4H, Ar-H), 8.16 (m, 4H, quinoxaline-H), 7.89 (br, 4H, quinoxaline-H), 7.77 (d, 8H, *J* = 1.65 Hz, Ar-H), 7.58 (m, 4H, quinoxaline-H), 1.48 (br, 72H, *t*-Bu-H) ppm; <sup>13</sup>C NMR (126 MHz, CDCl<sub>3</sub>): δ = 151.13, 149.40, 141.56, 138.31, 138.12, 133.54, 132.62, 131.65, 128.50, 128.30, 127.46, 125.99, 121.04, 118.58, 34.95, 31.78 ppm; HR-MS (MALDI-TOF-MS): *m/z* = 1422.7351 [*M*]<sup>+</sup>, calcd for (C<sub>96</sub>H<sub>100</sub>N<sub>8</sub>Ni)<sup>+</sup> = 1422.7424; λ<sub>max</sub> (ε [M<sup>-1</sup>cm<sup>-1</sup>]) = 336 (26007), 394 (72803), 482 (79325), 666 (7691), 725 (14032).

**7Ni**: <sup>1</sup>H NMR (500 MHz, CDCl<sub>3</sub>): δ = 7.95 (m, 8H, quinoxaline-H), 7.88 (br, 4H, Ar-H), 7.79 (m, 8H, quinoxaline-H), 7.69 (br, 8H, Ar-H), 1.41 (br, 72H, *t*-Bu-H) ppm; <sup>13</sup>C NMR (126 MHz, CDCl<sub>3</sub>): δ = 150.76, 149.36, 140.79, 136.52, 131.20, 130.33, 129.25, 127.21, 121.25, 117.68, 34.90, 31.89 ppm; HR-MS (MALDI-TOF-MS): *m/z* = 1526.7696 [*M*]<sup>+</sup>, calcd for (C<sub>100</sub>H<sub>100</sub>N<sub>12</sub>Ni)<sup>+</sup> = 1526.7547; λ<sub>max</sub> (ε [M<sup>-1</sup>cm<sup>-1</sup>]) = 356 (76173), 422 (39986), 514 (68641), 649 (10905), 701 (39157).

**8Ni**: <sup>1</sup>H NMR (500 MHz, CDCl<sub>3</sub>): δ = 8.56 (s, 8H, quinoxaline-H), 8.15 (m, 8H, quinoxaline-H), 7.80 (s, 4H, Ar-H), 7.74 (br, 8H, Ar-H), 7.57 (m, 8H, quinoxaline-H), 1.46 (br, 72H, *t*-Bu-H) ppm; <sup>13</sup>C NMR (126 MHz, CDCl<sub>3</sub>): δ = 151.27, 149.60, 137.81, 136.30, 133.76, 131.42, 128.59, 128.53, 127.20, 126.15, 121.44, 117.42, 34.98, 31.94 ppm; HR-MS (MALDI-TOF-MS): *m/z* = 1726.8268 [*M*]<sup>+</sup>, calcd for (C<sub>116</sub>H<sub>108</sub>N<sub>12</sub>Ni)<sup>+</sup> = 1726.8173; λ<sub>max</sub> (ε [M<sup>-1</sup>cm<sup>-1</sup>]) = 321 (53664), 384 (74720), 489 (82880), 561 (26955), 796 (34240).

**9Ni:**  $^1\text{H}$  NMR (500 MHz,  $\text{CDCl}_3$ ):  $\delta$  = 8.88 (d, 2H,  $J$  = 5.05 Hz,  $\beta$ -H), 8.76 (d, 2H,  $J$  = 4.95 Hz,  $\beta$ -H), 8.71 (s, 2H,  $\beta$ -H), 7.85 (d, 6H,  $J$  = 2.05 Hz, Ar-H), 7.71 (m, 8H, triptycene aromatic C-H and Ar-H), 7.51 (br, 4H, triptycene aromatic C-H), 7.10 (br, 4H, triptycene aromatic C-H), 5.65 (s, 2H, triptycene aliphatic C-H), 1.47 (br, 72H,  $t$ -Bu-H) ppm;  $^{13}\text{C}$  NMR (126 MHz,  $\text{CDCl}_3$ ):  $\delta$  = 150.50, 149.07, 149.03, 145.31, 144.08, 143.79, 141.70, 140.49, 140.08, 139.36, 139.04, 133.31, 133.00, 131.59, 131.27, 128.29, 127.67, 125.88, 123.93, 123.52, 121.86, 121.21, 120.62, 116.51, 53.81, 34.97, 34.90, 31.80, 31.66 ppm; HR-MS (MALDI-TOF-MS):  $m/z$  = 1396.7403  $[M]^+$ , calcd for  $(\text{C}_{96}\text{H}_{102}\text{N}_6\text{Ni})^+$  = 1396.7519;  $\lambda_{\text{max}}$  ( $\epsilon$  [ $\text{M}^{-1}\text{cm}^{-1}$ ]) = 370 (96405), 408 (216154), 450 (290126), 556 (35041), 599 (31051).

**9H:**  $^1\text{H}$  NMR (500 MHz,  $\text{CDCl}_3$ ):  $\delta$  = 9.02 (d, 2H,  $J$  = 4.95 Hz,  $\beta$ -H), 8.97 (d, 2H,  $J$  = 4.95 Hz,  $\beta$ -H), 8.77 (s, 2H,  $\beta$ -H), 8.08 (d, 4H,  $J$  = 1.85 Hz, Ar-H), 7.96 (br, 2H, Ar-H), 7.93 (d, 4H,  $J$  = 1.80 Hz, Ar-H), 7.79 (s, 2H, triptycene aromatic C-H), 7.66 (s, 2H, Ar-H), 7.51 (m, 4H, triptycene aromatic C-H), 7.08 (m, 4H, triptycene aromatic C-H), 5.65 (s, 2H, triptycene aliphatic C-H), 1.52 (br, 36H,  $t$ -Bu-H), 1.49 (br, 36H,  $t$ -Bu-H), -2.57 (s, 2H, NH) ppm;  $^{13}\text{C}$  NMR (126 MHz,  $\text{CDCl}_3$ ):  $\delta$  = 154.73, 152.45, 148.74, 146.04, 145.15, 144.28, 141.17, 140.93, 139.74, 139.66, 137.97, 134.08, 129.57, 128.49, 128.20, 127.86, 125.79, 123.90, 122.56, 121.03, 120.68, 118.15, 53.86, 35.05, 34.99, 34.91, 34.91, 31.75 ppm; HR-MS (MALDI-TOF-MS):  $m/z$  = 1340.8214  $[M]^+$ , calcd for  $(\text{C}_{96}\text{H}_{104}\text{N}_6)^+$  = 1340.8322;  $\lambda_{\text{max}}$  ( $\epsilon$  [ $\text{M}^{-1}\text{cm}^{-1}$ ]) = 369 (29536), 436 (196265), 527 (16223), 599 (8536).

**10Ni:**  $^1\text{H}$  NMR (500 MHz,  $\text{CDCl}_3$ ):  $\delta$  = 8.96 (d, 4H,  $J$  = 5.05 Hz,  $\beta$ -H), 8.80 (d, 4H,  $J$  = 4.95 Hz,  $\beta$ -H), 8.73 (s, 4H,  $\beta$ -H), 8.27 (s, 2H, triptycene aromatic C-H), 7.96 (s, 4H, triptycene aromatic C-H), 7.90 (br, 4H, Ar-H), 7.86 (br, 8H, Ar-H), 7.73 (s, 12H, Ar-H and Ar-H), 7.48 (d, 4H,  $J$  = 8.55 Hz, Ar-H), 6.91 (d, 4H,  $J$  = 8.55 Hz, Ar-H), 6.10 (s, 2H, triptycene aliphatic C-H), 3.86 (s, 6H, OMe-H), 1.53 (br, 72H,  $t$ -Bu-H), 1.49 (br, 72H,  $t$ -Bu-H) ppm;  $^{13}\text{C}$  NMR (126 MHz,  $\text{CDCl}_3$ ):  $\delta$  = 160.15, 152.83, 150.80, 149.19, 149.09, 144.04, 143.67, 142.95, 141.74, 140.53, 140.35, 139.27, 139.00, 133.11, 131.71, 131.29, 131.21, 128.27, 127.76, 124.58, 123.56, 122.00, 121.26, 120.54, 116.63, 113.79, 55.31, 53.31, 34.97, 31.89, 31.64 ppm; HR-MS (MALDI-TOF-MS):  $m/z$  = 2803.4625  $[M]^+$ , calcd for  $(\text{C}_{188}\text{H}_{202}\text{N}_{14}\text{Ni}_2\text{O}_2)^+$  = 2803.4842;  $\lambda_{\text{max}}$  ( $\epsilon$  [ $\text{M}^{-1}\text{cm}^{-1}$ ]) = 411 (212123), 455 (193363), 560 (31516), 602 (26809).

**11Ni:**  $^1\text{H}$  NMR (500 MHz,  $\text{CDCl}_3$ ):  $\delta = 8.87$  (d, 2H,  $J = 4.95$  Hz,  $\beta$ -H), 8.73 (d, 2H,  $J = 5.05$  Hz,  $\beta$ -H), 8.67 (s, 2H,  $\beta$ -H), 8.22 (s, 4H, triptycene aromatic C-H), 7.86 (s, 2H, triptycene aromatic C-H), 7.83 (m, 6H, Ar-H), 7.68 (m, 6H, Ar-H), 7.43 (d, 8H,  $J = 8.50$  Hz, Ar-H), 6.85 (d, 8H,  $J = 8.50$  Hz, Ar-H), 6.04 (s, 2H, triptycene aliphatic C-H), 3.82 (s, 12H, OMe-H), 1.44 (br, 72H, *t*-Bu-H) ppm;  $^{13}\text{C}$  NMR (126 MHz,  $\text{CDCl}_3$ ):  $\delta = 160.13, 152.78, 150.76, 149.18, 149.07, 143.80, 143.72, 142.90, 141.75, 140.55, 140.27, 139.27, 138.94, 133.05, 131.64, 131.60, 131.30, 131.19, 128.27, 127.65, 124.51, 123.59, 121.98, 121.24, 120.70, 116.66, 113.76, 55.32, 53.30, 53.27, 34.96, 34.93, 31.81$  ppm; HR-MS (MALDI-TOF-MS):  $m/z = 1924.9280 [M]^+$ , calcd for  $(\text{C}_{128}\text{H}_{126}\text{N}_{10}\text{NiO}_4)^+ = 1924.9317$ ;  $\lambda_{\text{max}}$  ( $\epsilon$  [ $\text{M}^{-1}\text{cm}^{-1}$ ]) = 408 (141070), 453 (119086), 522 (11061), 559 (17416), 600 (15644).

**12Ni:**  $^1\text{H}$  NMR (500 MHz,  $\text{CDCl}_3$ ):  $\delta = 8.90$  (d, 6H,  $J = 4.95$  Hz,  $\beta$ -H), 8.75 (d, 6H,  $J = 4.95$  Hz,  $\beta$ -H), 8.67 (s, 6H,  $\beta$ -H), 7.93 (s, 6H, triptycene aromatic C-H), 7.84 (br, 6H, Ar-H), 7.80 (br, 12H, Ar-H), 7.68 (br, 18H, Ar-H), 6.04 (s, 2H, triptycene aliphatic C-H), 1.50 (br, 108H, *t*-Bu-H), 1.44 (br, 108H, *t*-Bu-H) ppm;  $^{13}\text{C}$  NMR (126 MHz,  $\text{CDCl}_3$ ):  $\delta = 150.82, 149.13, 149.07, 143.60, 143.06, 141.68, 140.47, 139.23, 139.01, 133.17, 133.03, 131.70, 131.23, 128.89, 128.23, 127.85, 124.58, 121.98, 121.25, 120.25, 116.53, 35.00, 34.96, 31.94, 31.64$  ppm; HR-MS (MALDI-TOF-MS):  $m/z = 3682.0347 [M]^+$ , calcd for  $(\text{C}_{248}\text{H}_{278}\text{N}_{18}\text{Ni}_3)^+ = 3682.0367$ ;  $\lambda_{\text{max}}$  ( $\epsilon$  [ $\text{M}^{-1}\text{cm}^{-1}$ ]) = 376 (163718), 412 (431665), 461 (416424), 560 (69076), 601 (55064).

**12H:**  $^1\text{H}$  NMR (500 MHz,  $\text{CDCl}_3$ ):  $\delta = 9.03$  (d, 6H,  $J = 5.15$  Hz,  $\beta$ -H), 8.99 (d, 6H,  $J = 5.20$  Hz,  $\beta$ -H), 8.78 (s, 6H,  $\beta$ -H), 8.12 (s, 6H, triptycene aromatic C-H), 8.09 (br, 12H, Ar-H), 7.99 (br, 12H, Ar-H), 7.92 (s, 6H, Ar-H), 7.80 (s, 6H, Ar-H), 6.08 (s, 2H, triptycene aliphatic C-H), 1.61 (br, 108H, *t*-Bu-H), 1.53 (br, 108H, *t*-Bu-H), -2.57 (s, 6H, NH) ppm;  $^{13}\text{C}$  NMR (126 MHz,  $\text{CDCl}_3$ ):  $\delta = 154.79, 152.80, 148.80, 148.75, 145.74, 143.36, 141.11, 141.04, 140.14, 139.66, 138.02, 134.12, 129.56, 128.57, 128.28, 127.89, 124.79, 122.66, 121.04, 120.38, 118.12, 53.56, 35.11, 35.04, 32.09, 31.74$  ppm; HR-MS (MALDI-TOF-MS):  $m/z = 3514.2580 [M]^+$ , calcd for  $(\text{C}_{248}\text{H}_{284}\text{N}_{18})^+ = 3514.2776$ ;  $\lambda_{\text{max}}$  ( $\epsilon$  [ $\text{M}^{-1}\text{cm}^{-1}$ ]) = 373 (43167), 441 (259426), 529 (25957), 565 (10392), 600 (15847).

**12Zn**:  $^1\text{H}$  NMR (500 MHz,  $\text{CDCl}_3$ ):  $\delta$  = 8.97 (s, 12H,  $\beta$ -H), 8.87 (s, 6H,  $\beta$ -H), 8.11 (s, 6H, triptycene aromatic C-H), 8.07 (d, 12H,  $J$  = 1.85 Hz, Ar-H), 7.99 (br, 6H, Ar-H), 7.96 (d, 12H,  $J$  = 1.85 Hz, Ar-H), 7.77 (br, 6H, Ar-H), 6.13 (s, 2H, triptycene aliphatic C-H), 1.51 (br, 216H, *t*-Bu-H) ppm;  $^{13}\text{C}$  NMR (126 MHz,  $\text{CDCl}_3$ ):  $\delta$  = 152.62, 150.67, 149.91, 149.12, 148.73, 148.59, 143.32, 141.64, 140.48, 132.33, 131.59, 131.52, 129.35, 128.37, 124.71, 120.90, 120.14, 118.87, 35.12, 35.05, 32.12, 31.76 ppm; HR-MS (MALDI-TOF-MS):  $m/z$  = 3700.0282 [ $M$ ] $^+$ , calcd for  $(\text{C}_{248}\text{H}_{278}\text{N}_{18}\text{Zn}_3)^+$  = 3700.0181;  $\lambda_{\text{max}}$  ( $\epsilon$  [ $\text{M}^{-1}\text{cm}^{-1}$ ]) = 370 (116868), 423 (528138), 450 (540609), 532 (39181), 571 (95129), 612 (69093).

## NMR Spectra of Compounds

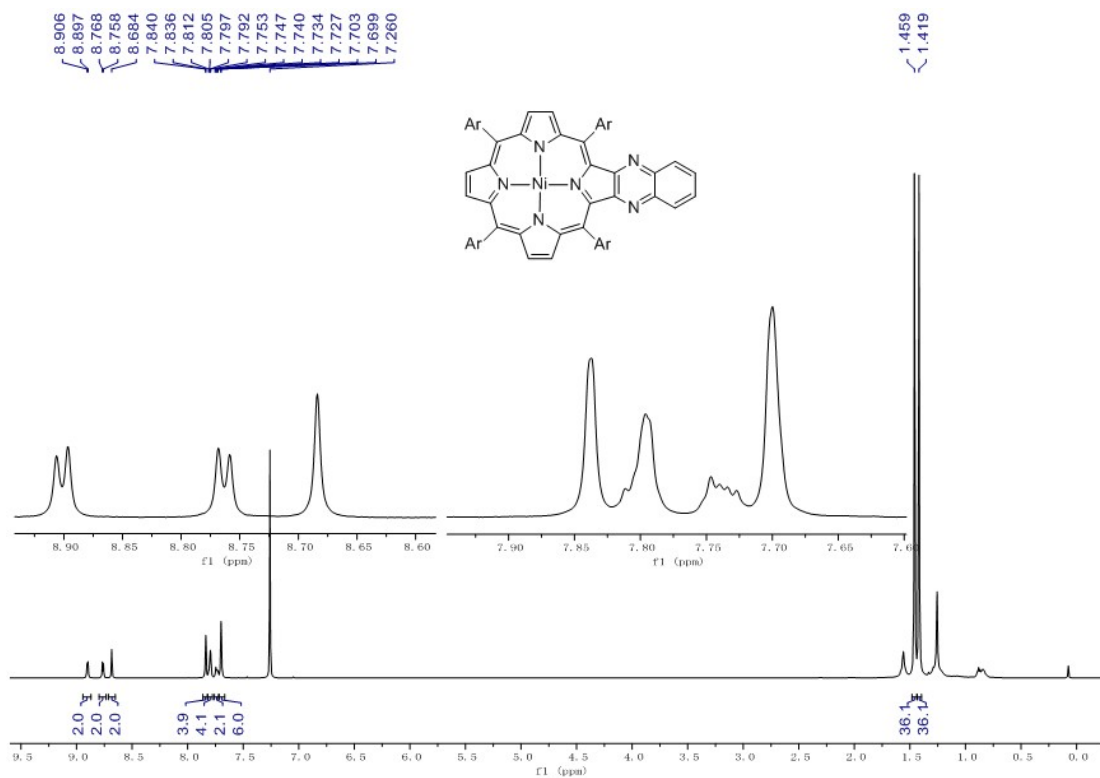

Figure S1. <sup>1</sup>H NMR spectrum of **3Ni** in CDCl<sub>3</sub> at 298 K

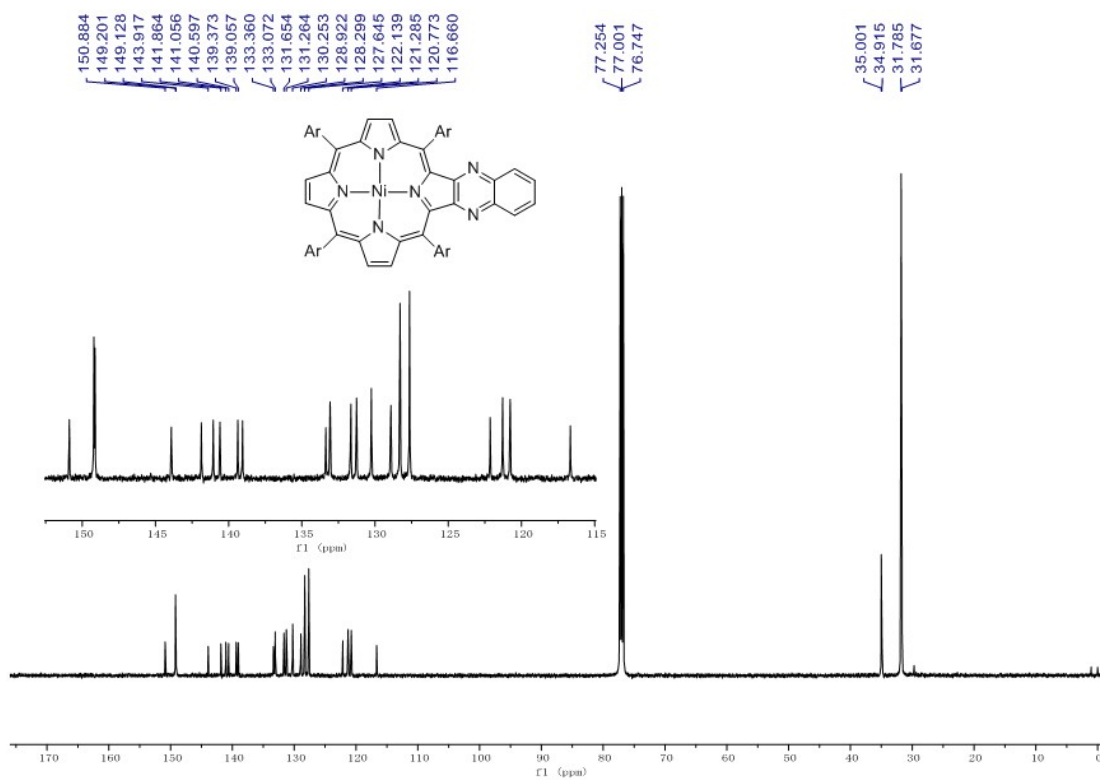

Figure S2. <sup>13</sup>C NMR spectrum of **3Ni** in CDCl<sub>3</sub> at 298 K

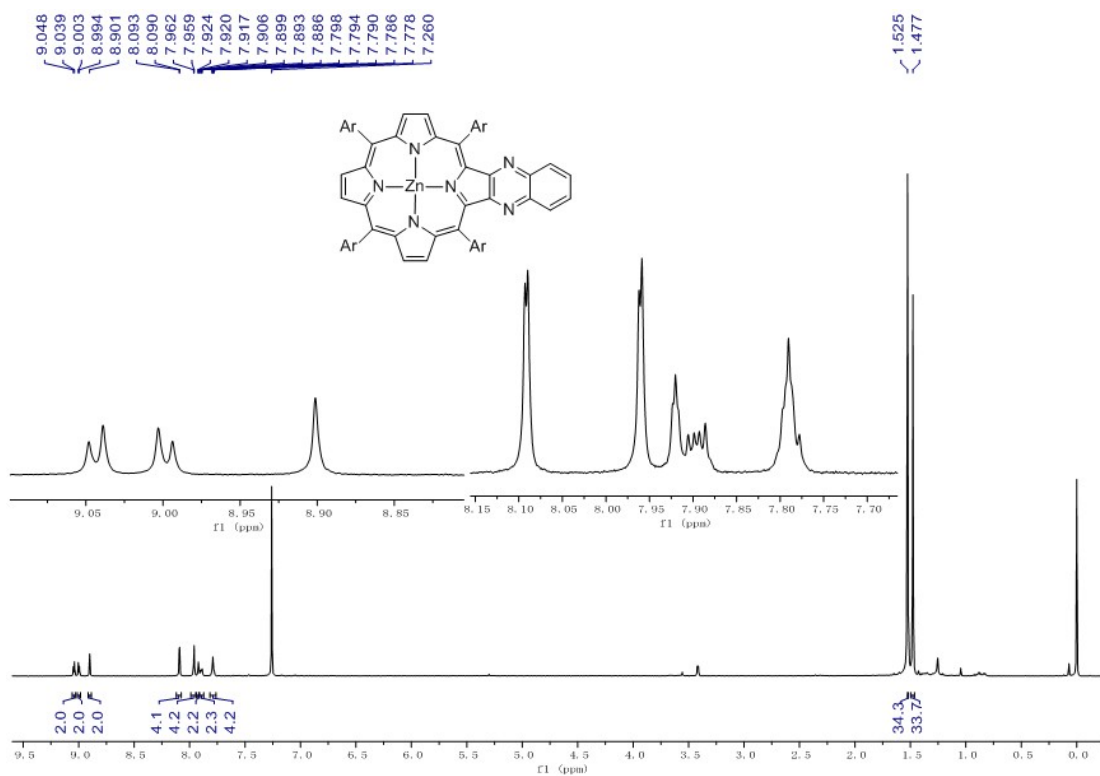

**Figure S3.**  $^1\text{H}$  NMR spectrum of **3Zn** in  $\text{CDCl}_3$  at 298 K

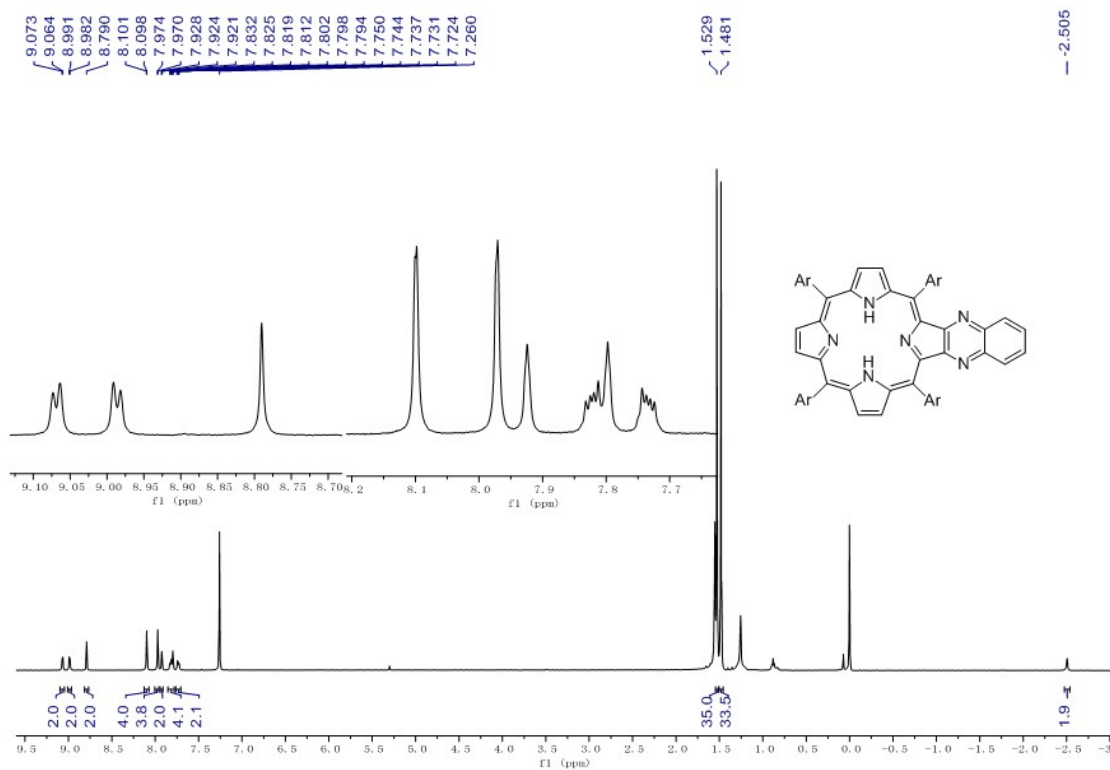

**Figure S4.**  $^1\text{H}$  NMR spectrum of **3H** in  $\text{CDCl}_3$  at 298 K

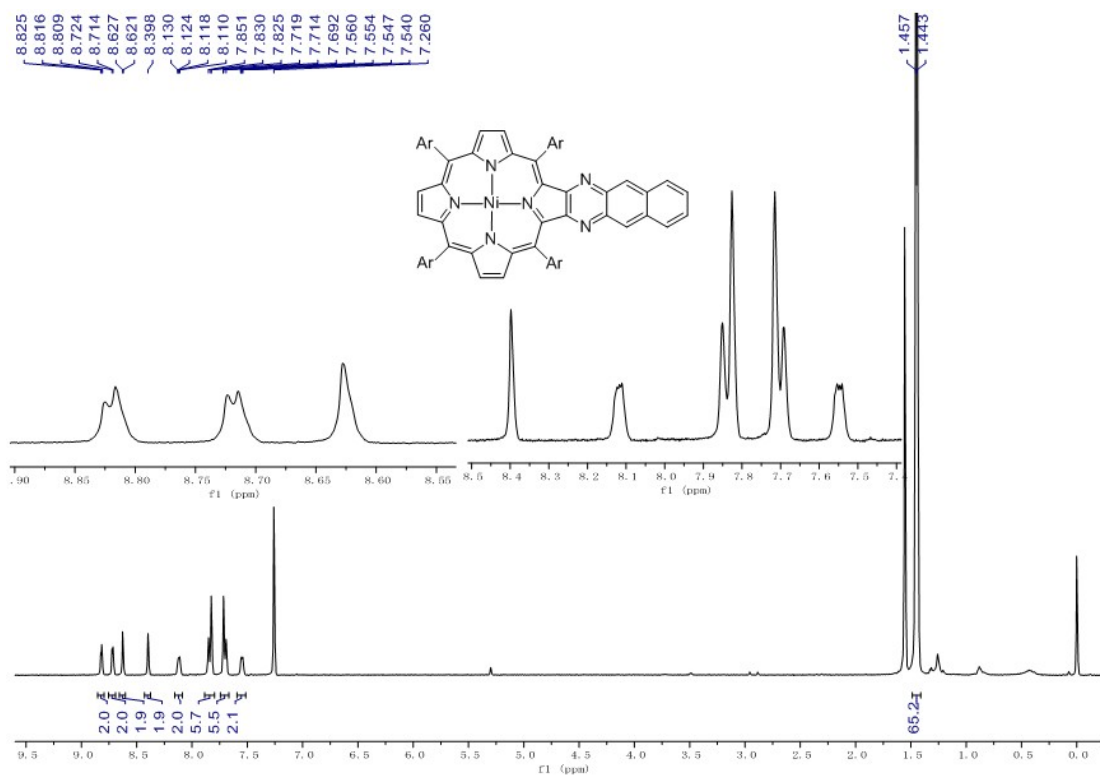

**Figure S5. <sup>1</sup>H NMR spectrum of 4Ni in CDCl<sub>3</sub> at 298 K**

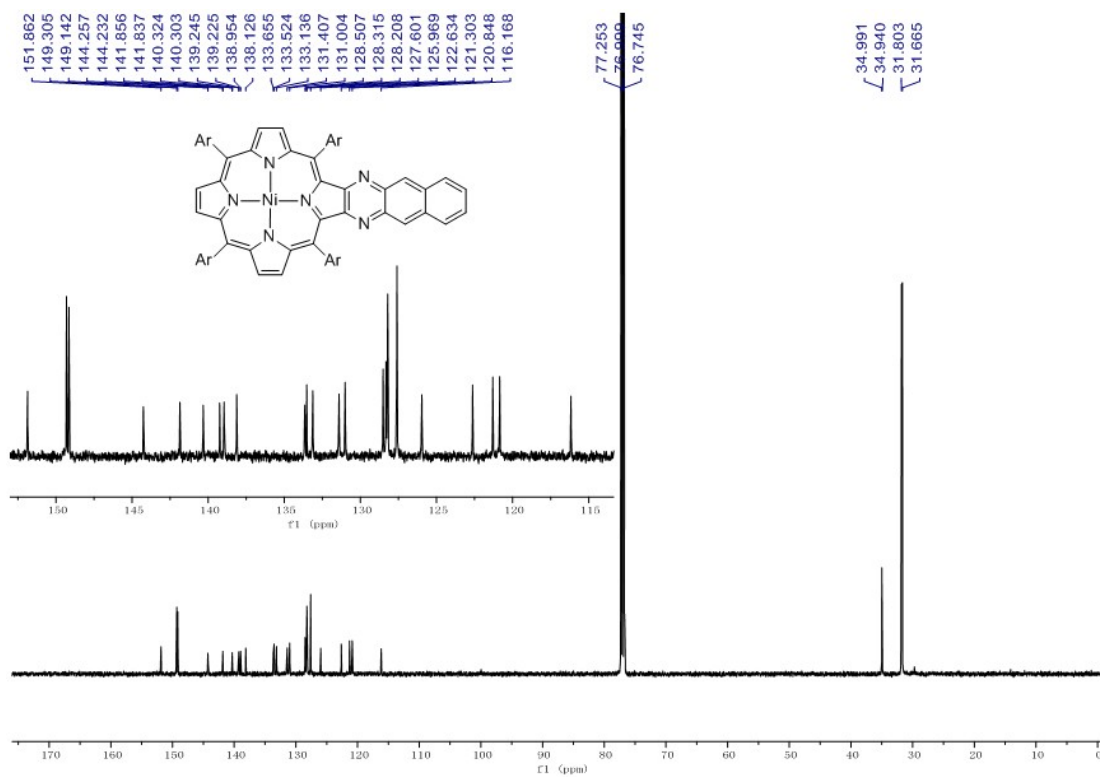

**Figure S6. <sup>13</sup>C NMR spectrum of 4Ni in CDCl<sub>3</sub> at 298 K**



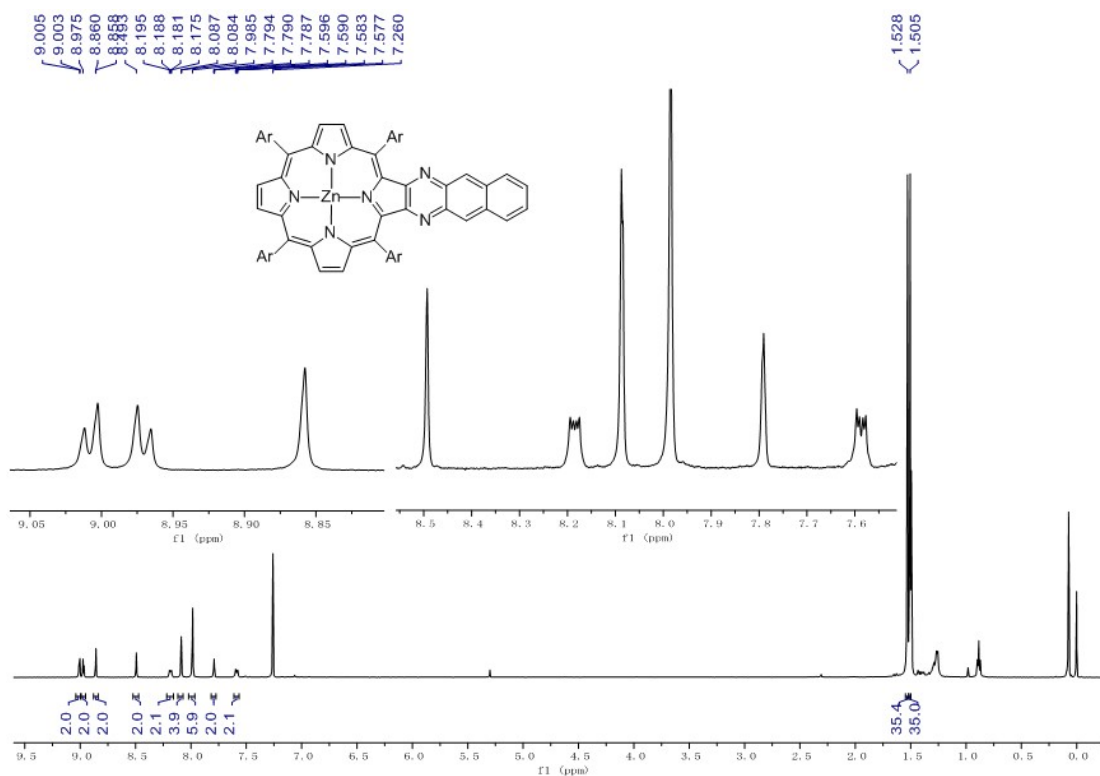

**Figure S7. <sup>1</sup>H NMR spectrum of 4Zn in CDCl<sub>3</sub> at 298 K**

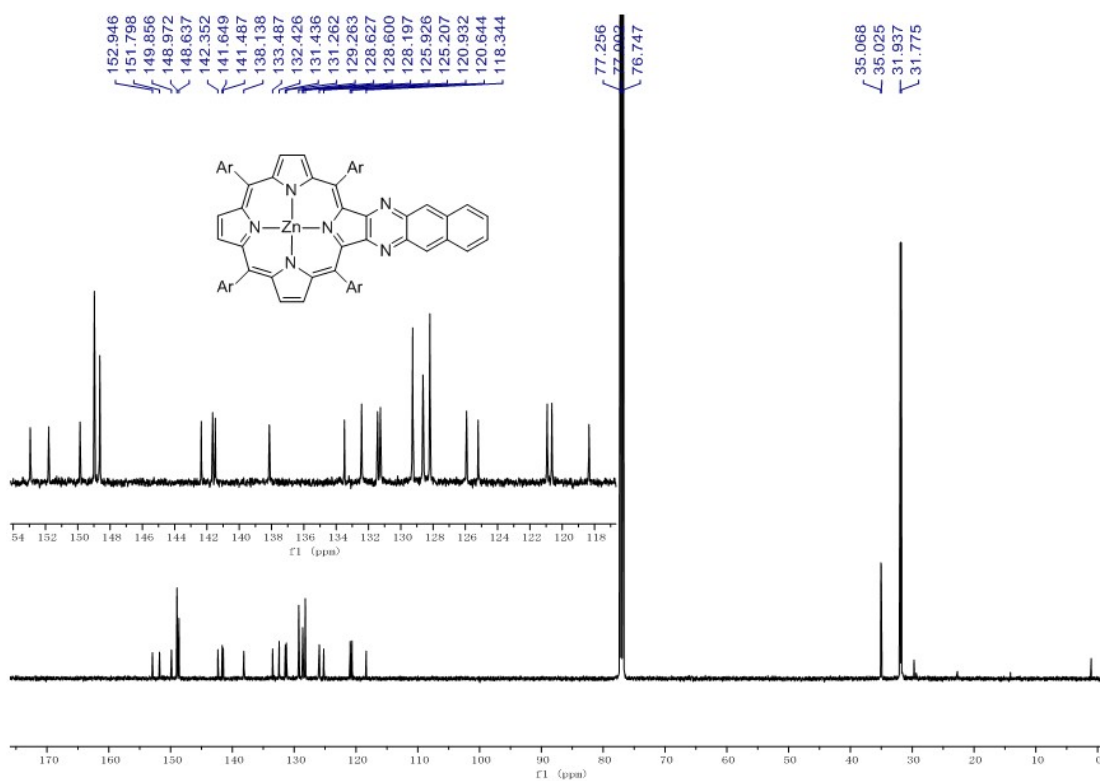

**Figure S8. <sup>13</sup>C NMR spectrum of 4Zn in CDCl<sub>3</sub> at 298 K**

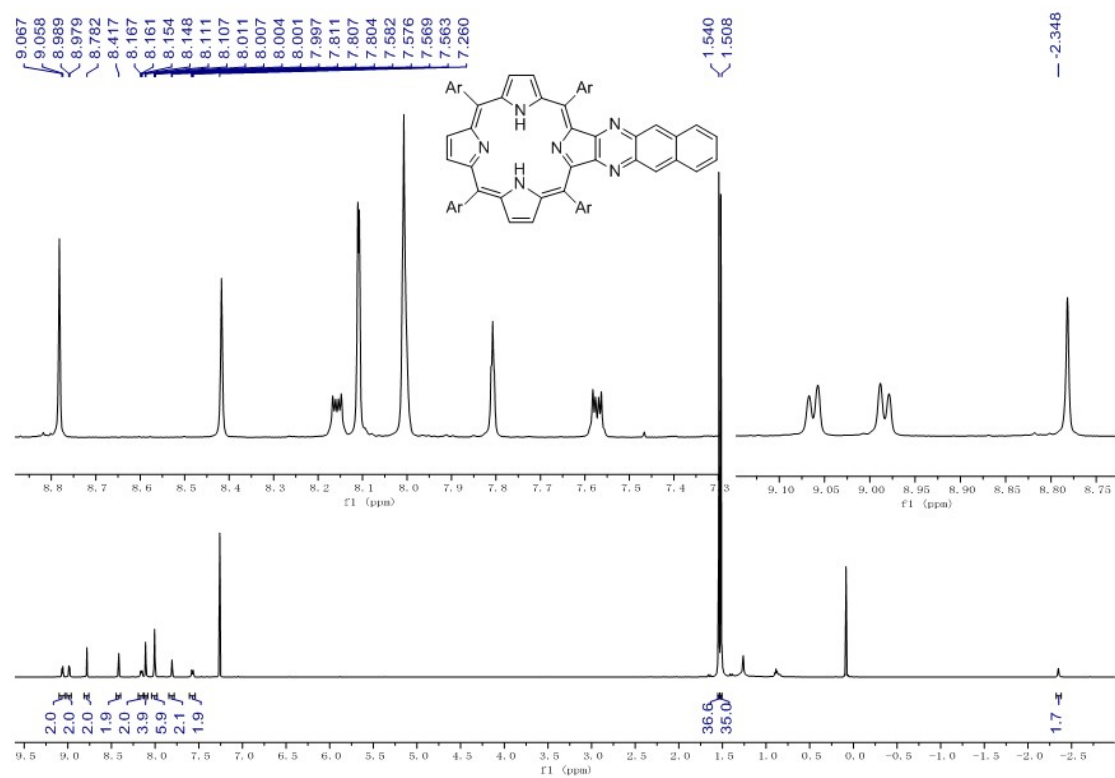

**Figure S9.**  $^1\text{H}$  NMR spectrum of **4H** in  $\text{CDCl}_3$  at 298 K

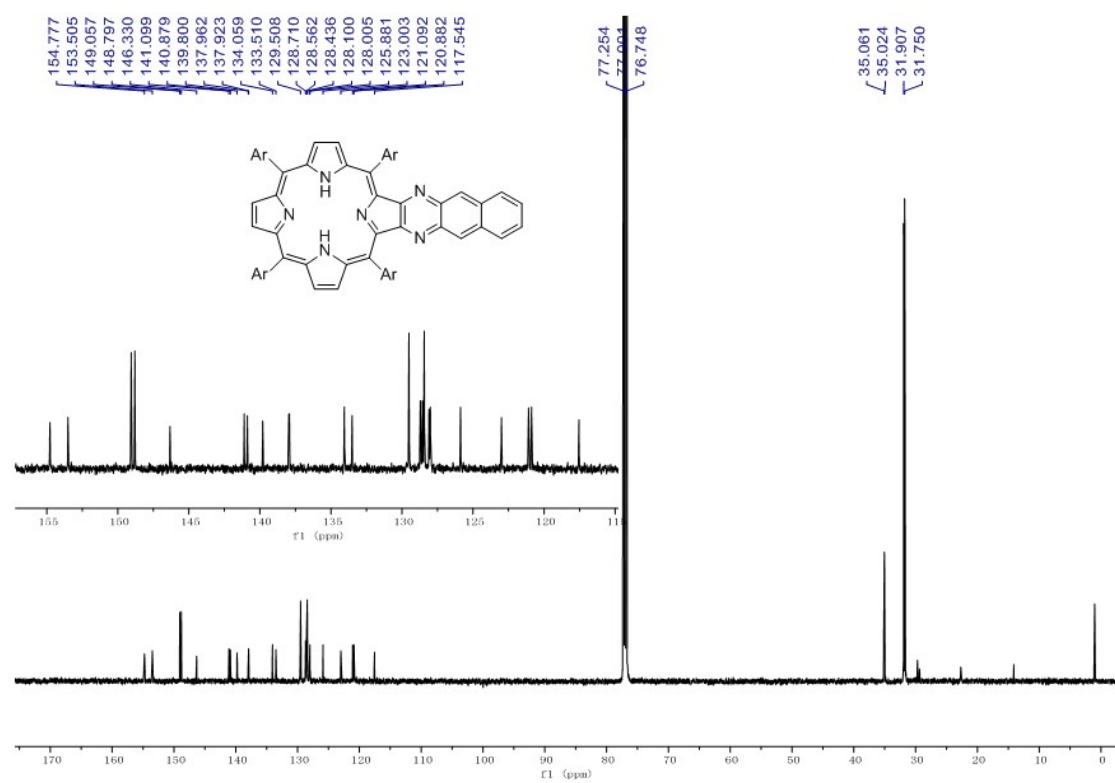

**Figure S10.**  $^{13}\text{C}$  NMR spectrum of **4H** in  $\text{CDCl}_3$  at 298 K

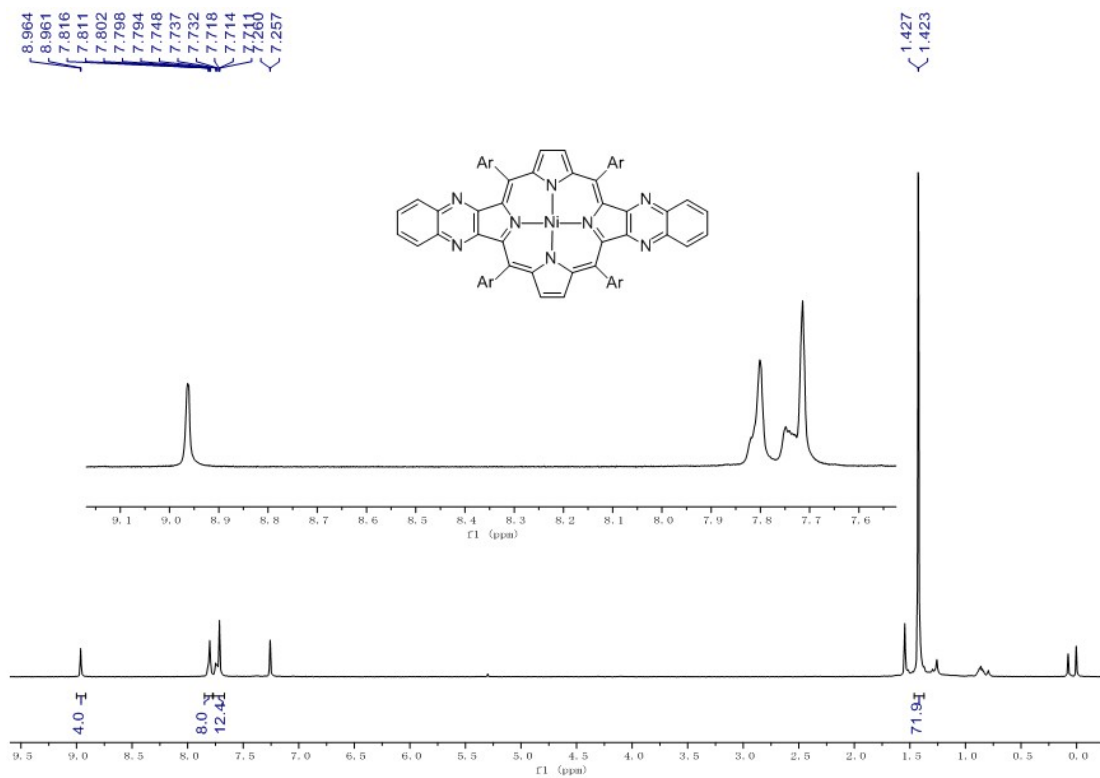

**Figure S11.** <sup>1</sup>H NMR spectrum of **5Ni** in CDCl<sub>3</sub> at 298 K

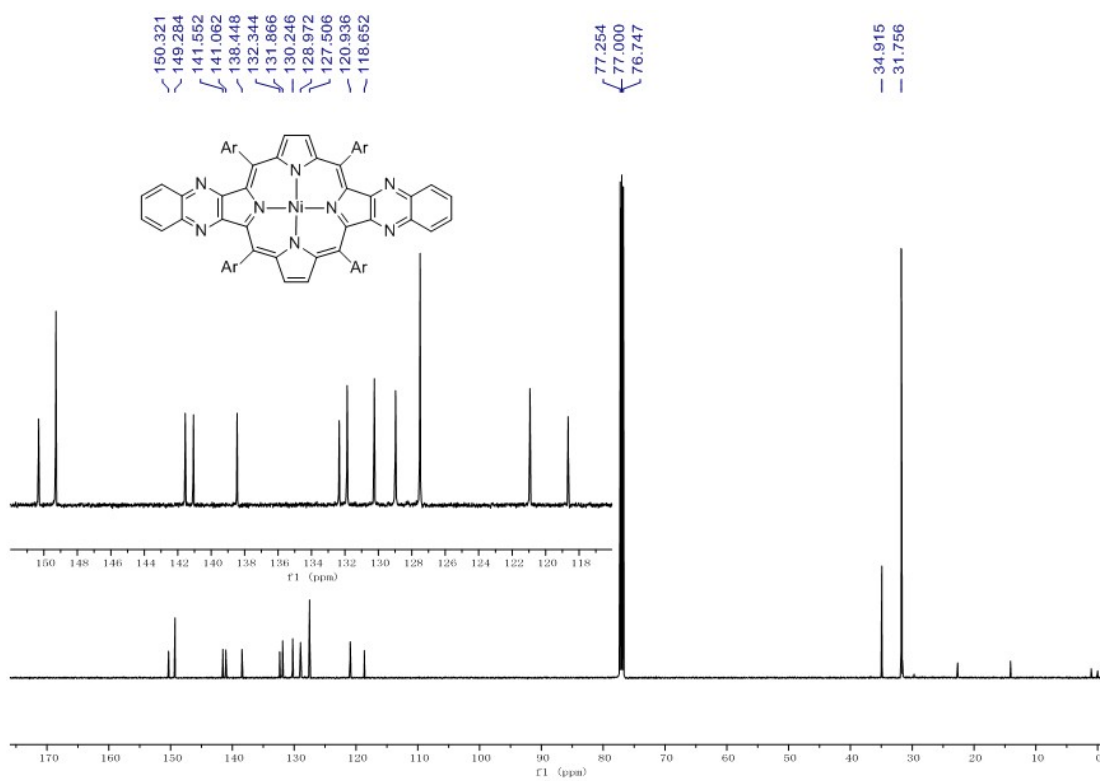

**Figure S12.** <sup>13</sup>C NMR spectrum of **5Ni** in CDCl<sub>3</sub> at 298 K

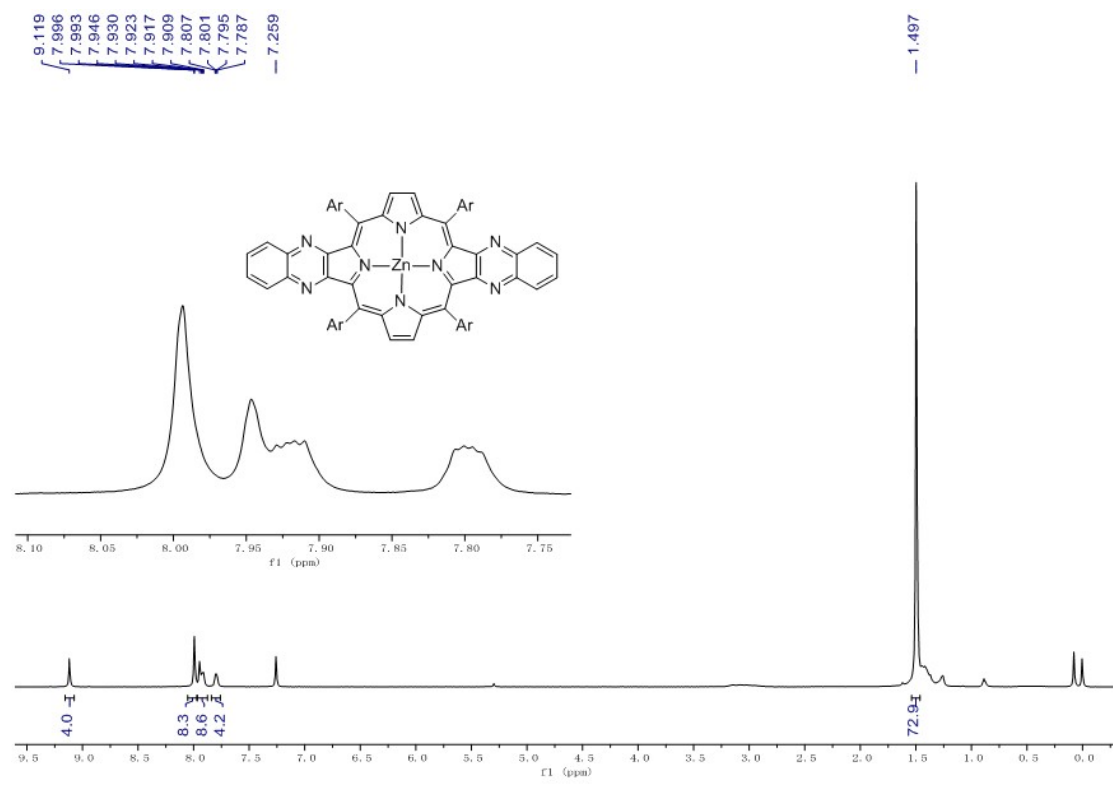

**Figure S13.**  $^1\text{H}$  NMR spectrum of **5Zn** in  $\text{CDCl}_3$  at 298 K

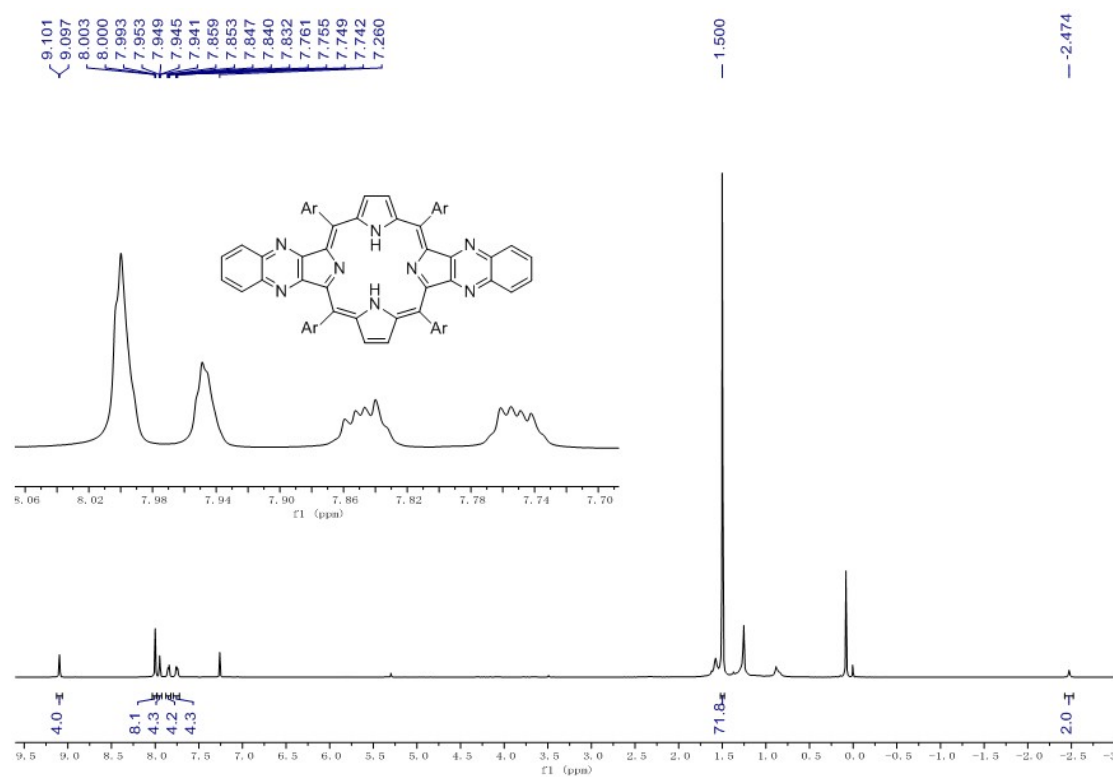

**Figure S14.**  $^1\text{H}$  NMR spectrum of **5H** in  $\text{CDCl}_3$  at 298 K

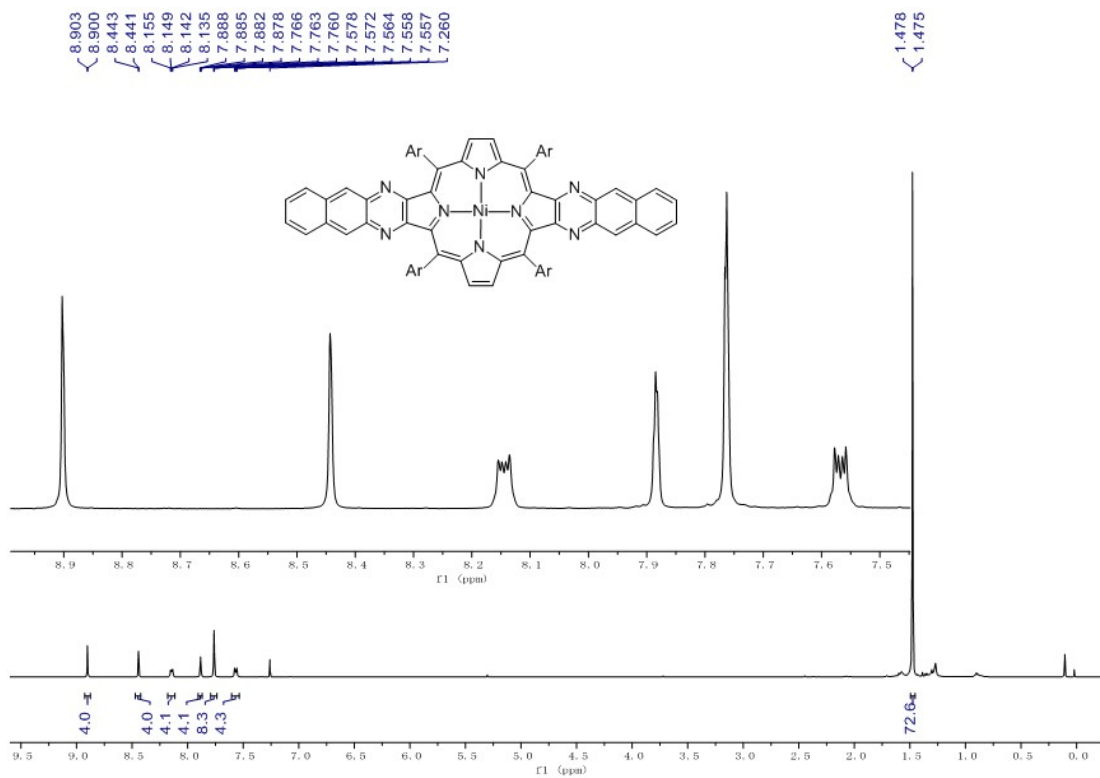

**Figure S15.**  $^1\text{H}$  NMR spectrum of **6Ni** in  $\text{CDCl}_3$  at 298 K

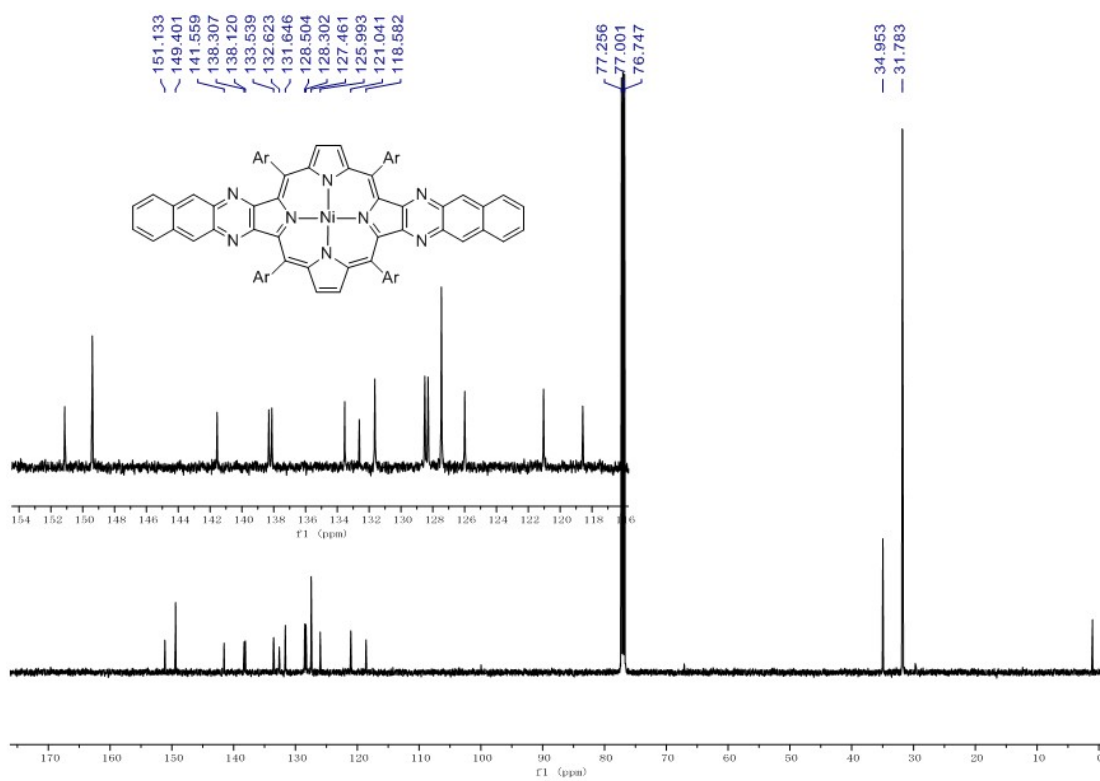

**Figure S16.**  $^{13}\text{C}$  NMR spectrum of **6Ni** in  $\text{CDCl}_3$  at 298 K

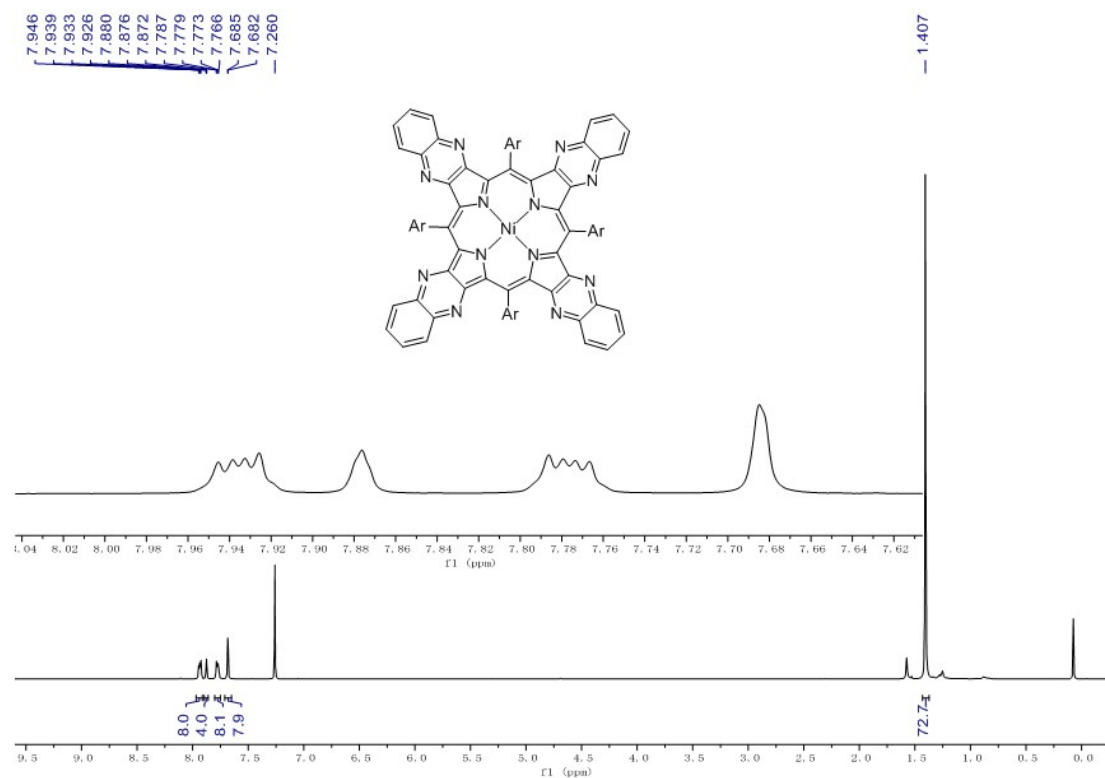

**Figure S17.** <sup>1</sup>H NMR spectrum of **7Ni** in CDCl<sub>3</sub> at 298 K

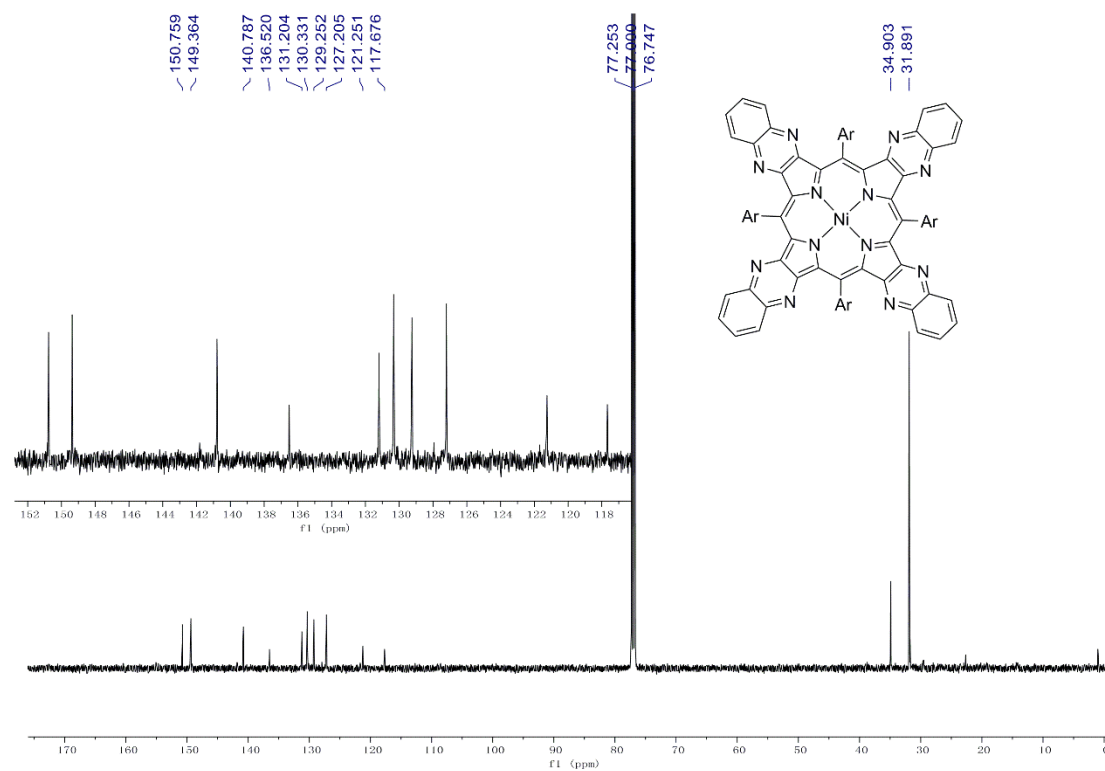

**Figure S18.** <sup>13</sup>C NMR spectrum of **7Ni** in CDCl<sub>3</sub> at 298 K

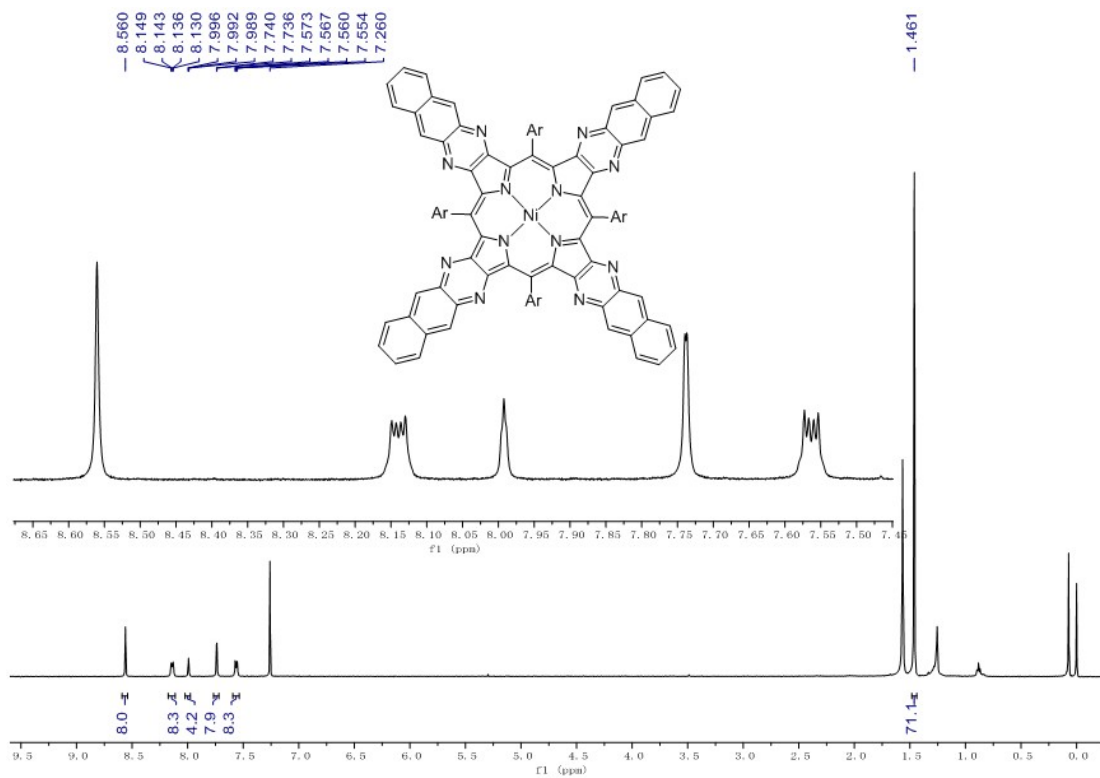

Figure S19.  $^1\text{H}$  NMR spectrum of **8Ni** in  $\text{CDCl}_3$  at 298 K

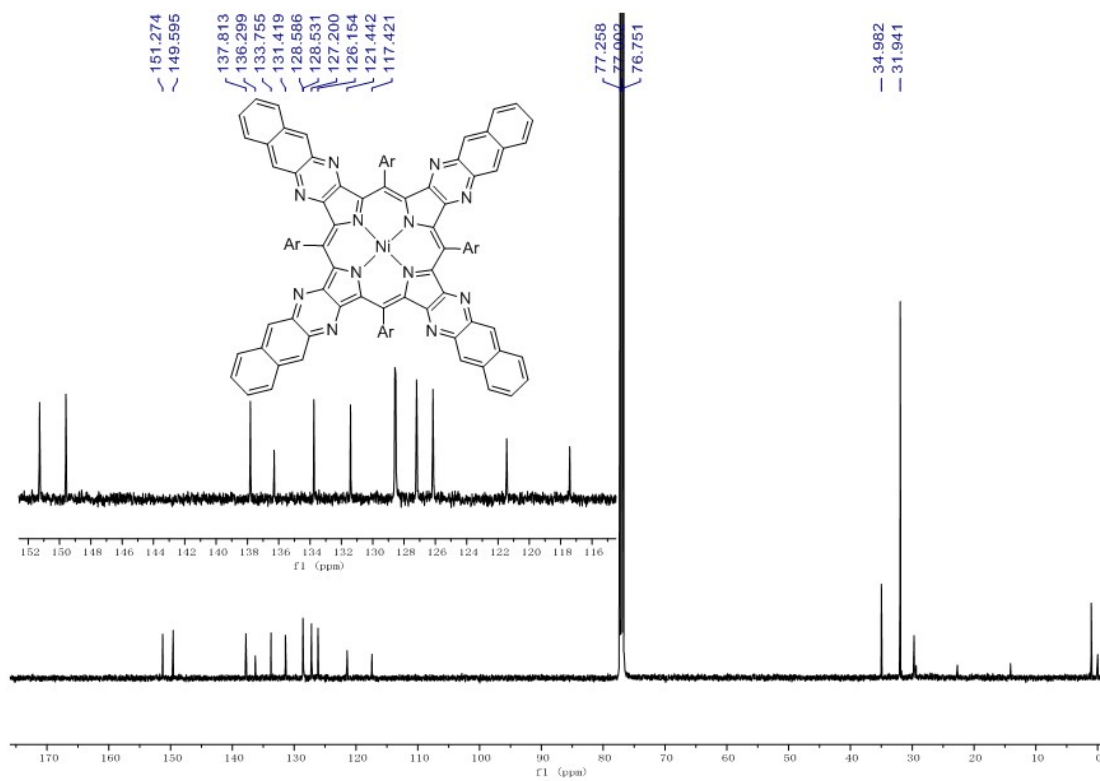

Figure S20.  $^{13}\text{C}$  NMR spectrum of **8Ni** in  $\text{CDCl}_3$  at 298 K

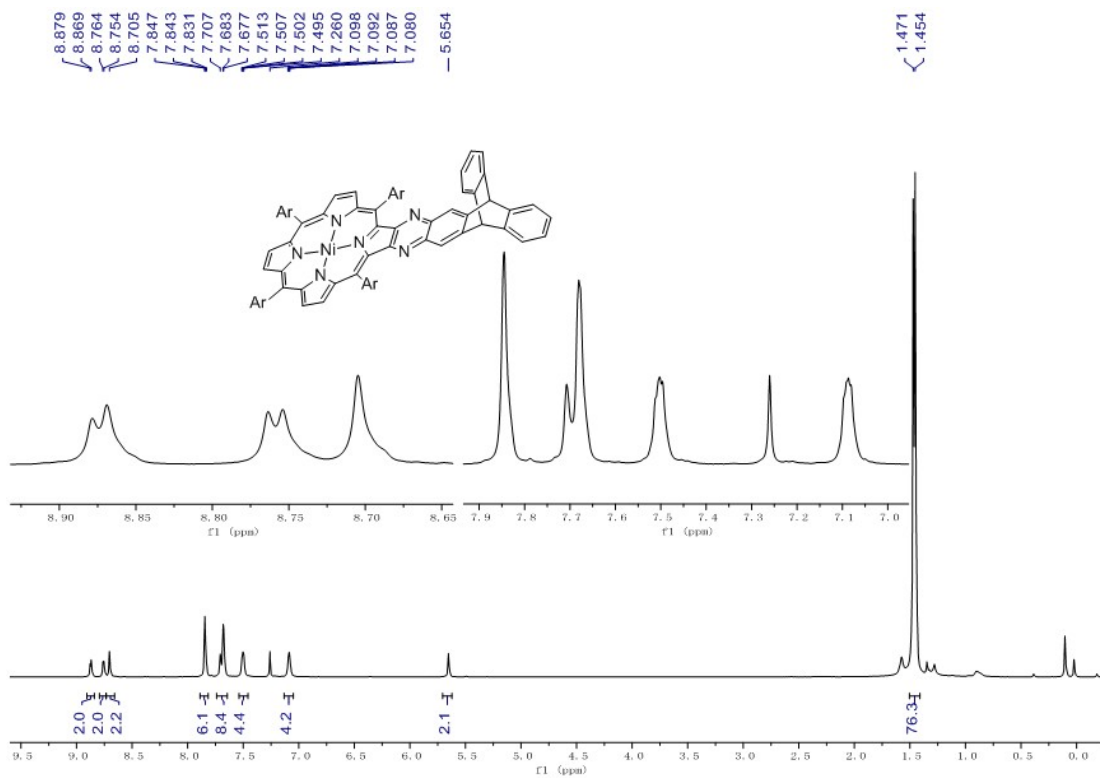

**Figure S21.**  $^1\text{H}$  NMR spectrum of **9Ni** in  $\text{CDCl}_3$  at 298 K

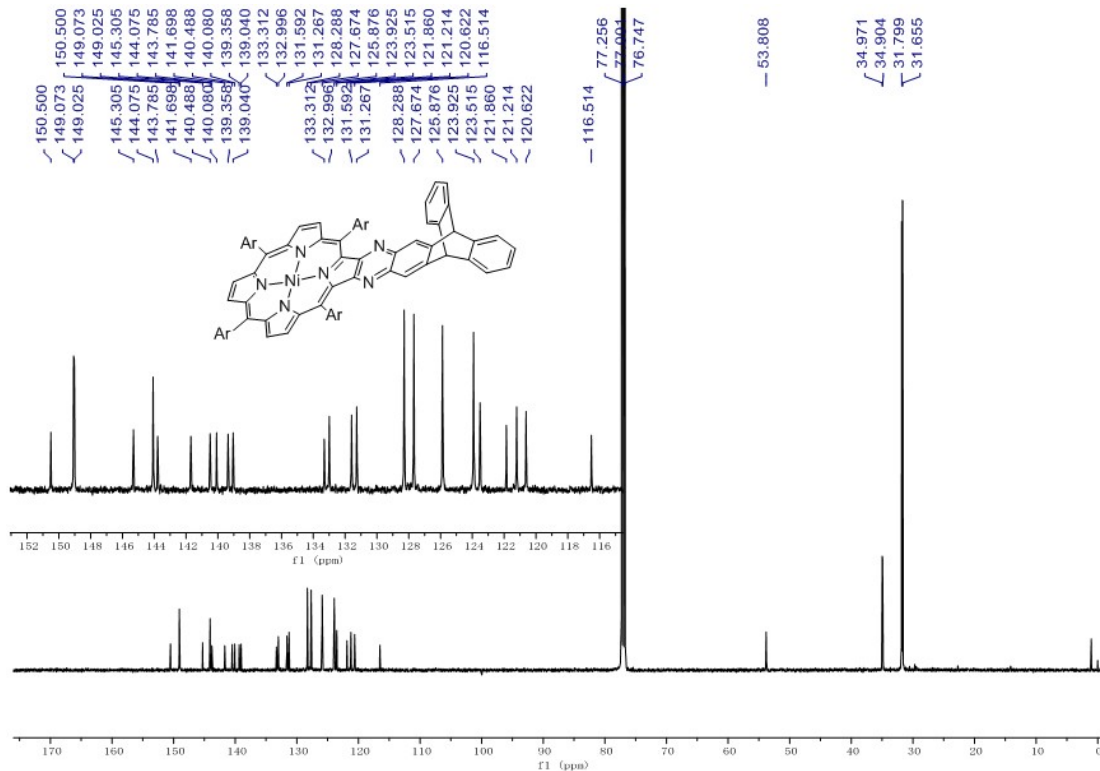

**Figure S22.**  $^{13}\text{C}$  NMR spectrum of **9Ni** in  $\text{CDCl}_3$  at 298 K



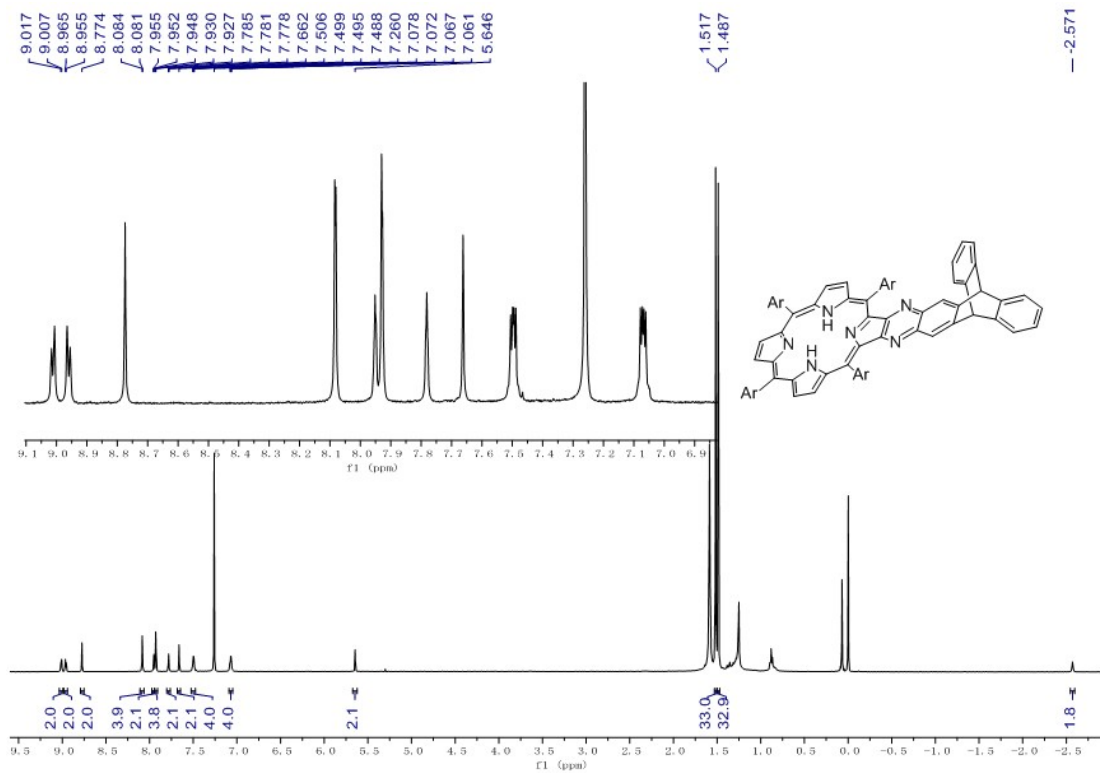

**Figure S23.** <sup>1</sup>H NMR spectrum of **9H** in CDCl<sub>3</sub> at 298 K

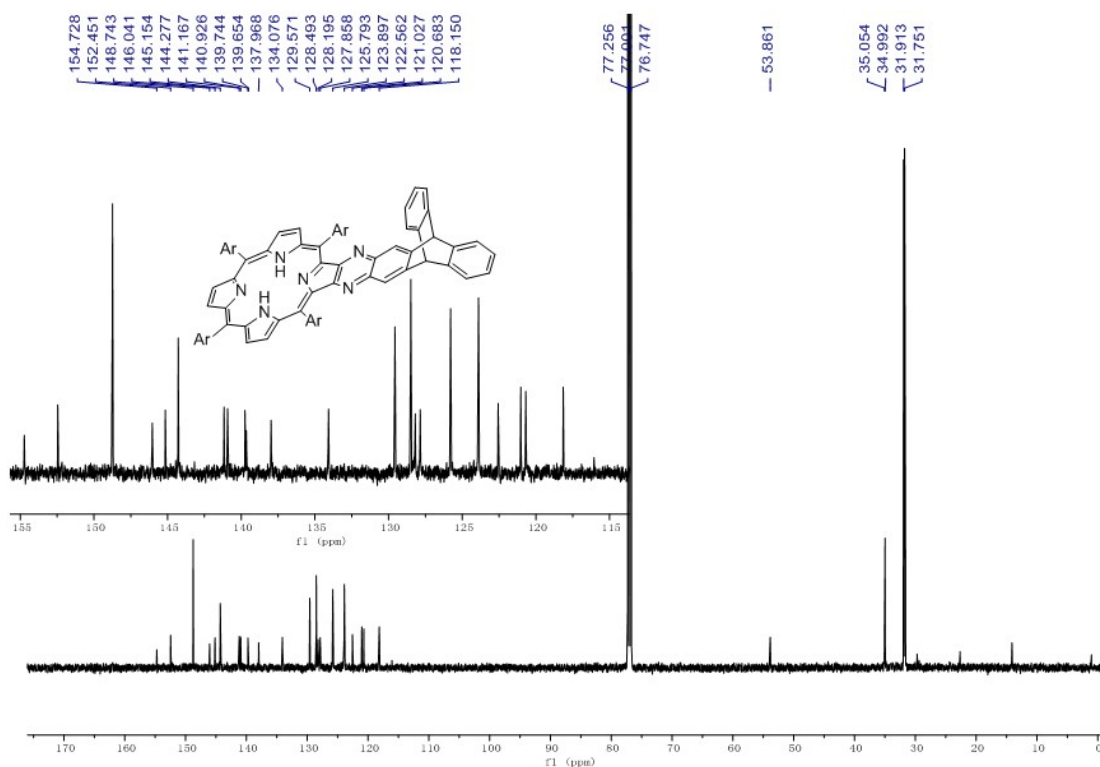

**Figure S24.** <sup>13</sup>C NMR spectrum of **9H** in CDCl<sub>3</sub> at 298 K

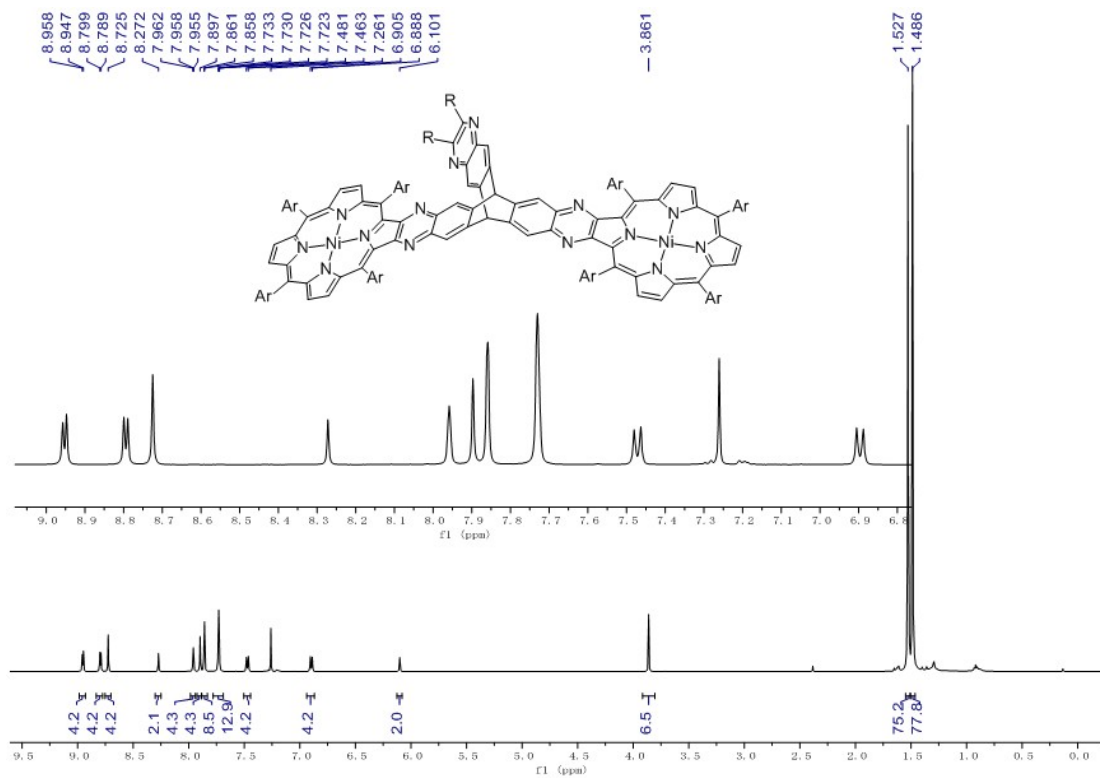

**Figure S25.** <sup>1</sup>H NMR spectrum of **10Ni** in CDCl<sub>3</sub> at 298 K

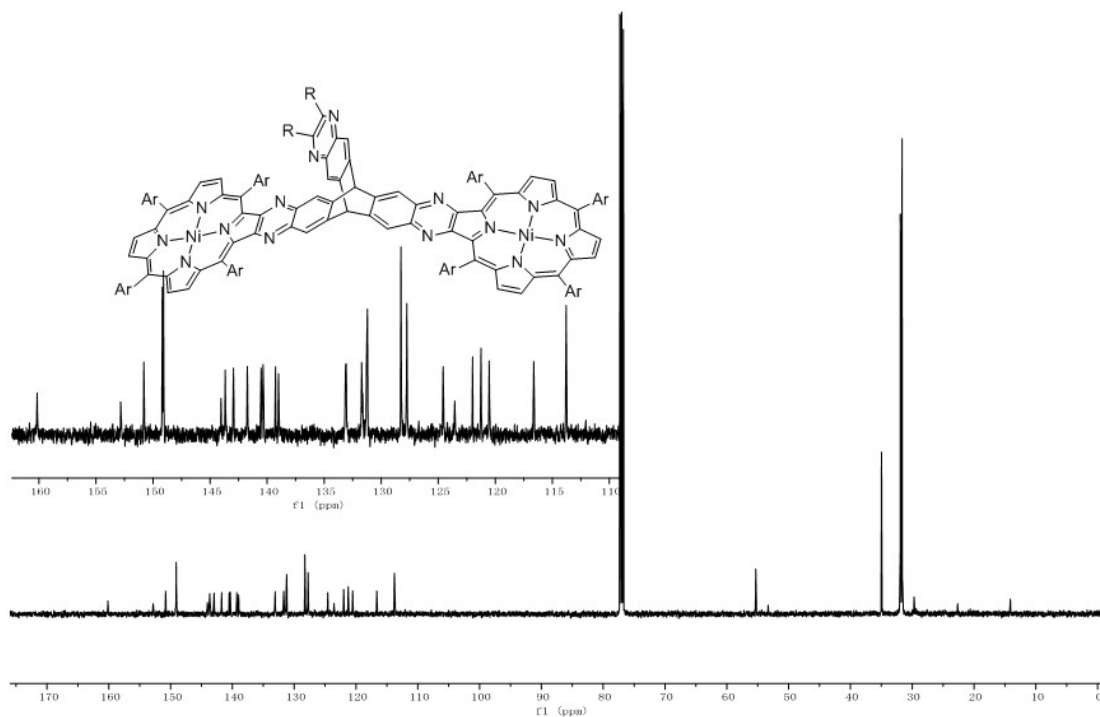

**Figure S26.** <sup>13</sup>C NMR spectrum of **10Ni** in CDCl<sub>3</sub> at 298 K.

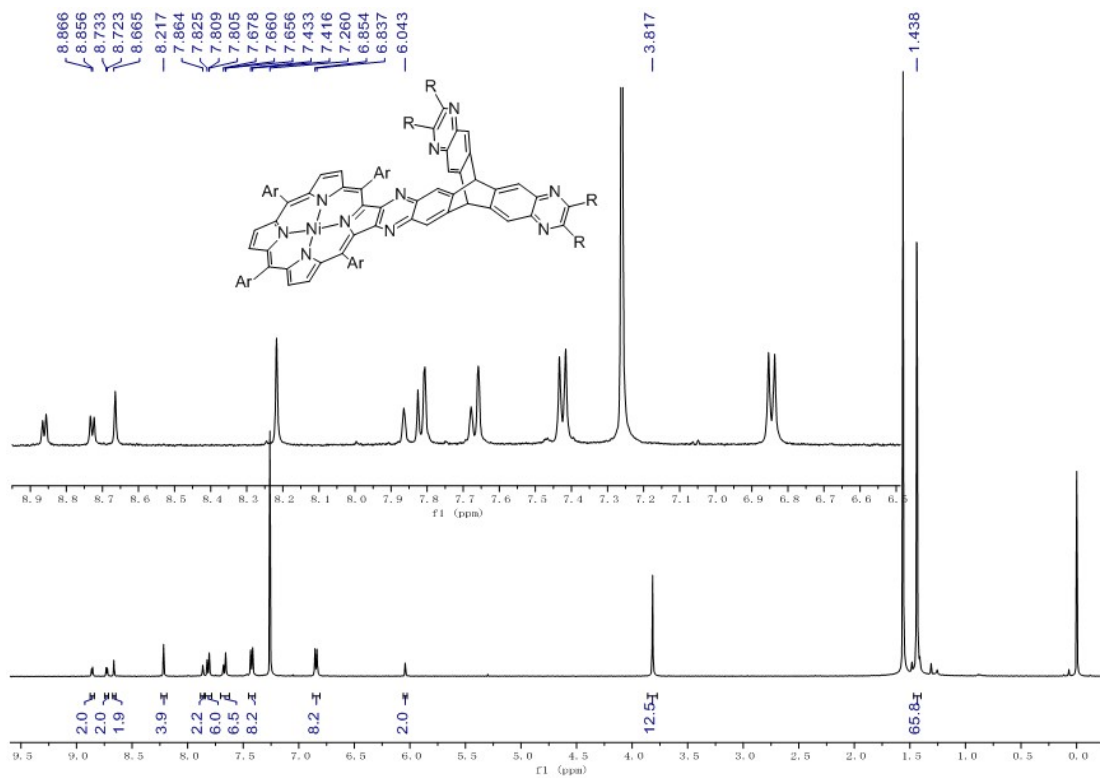

Figure S27.  $^1\text{H}$  NMR spectrum of **11Ni** in  $\text{CDCl}_3$  at 298 K

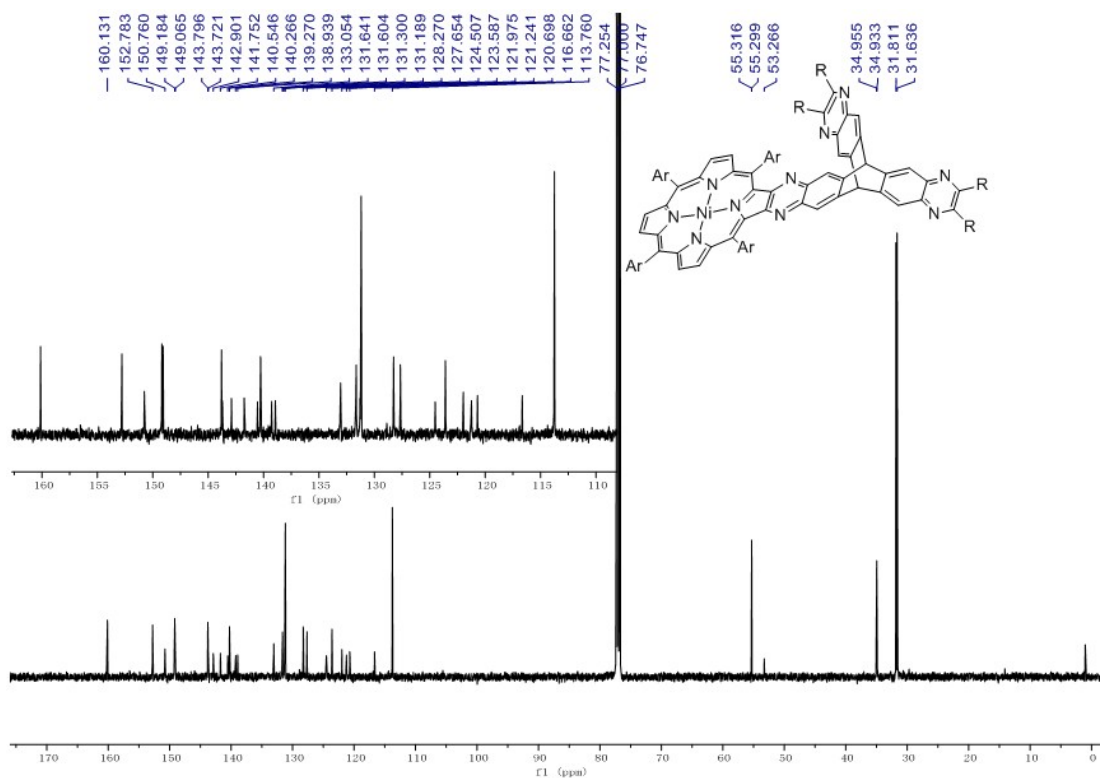

Figure S28.  $^{13}\text{C}$  NMR spectrum of **11Ni** in  $\text{CDCl}_3$  at 298 K

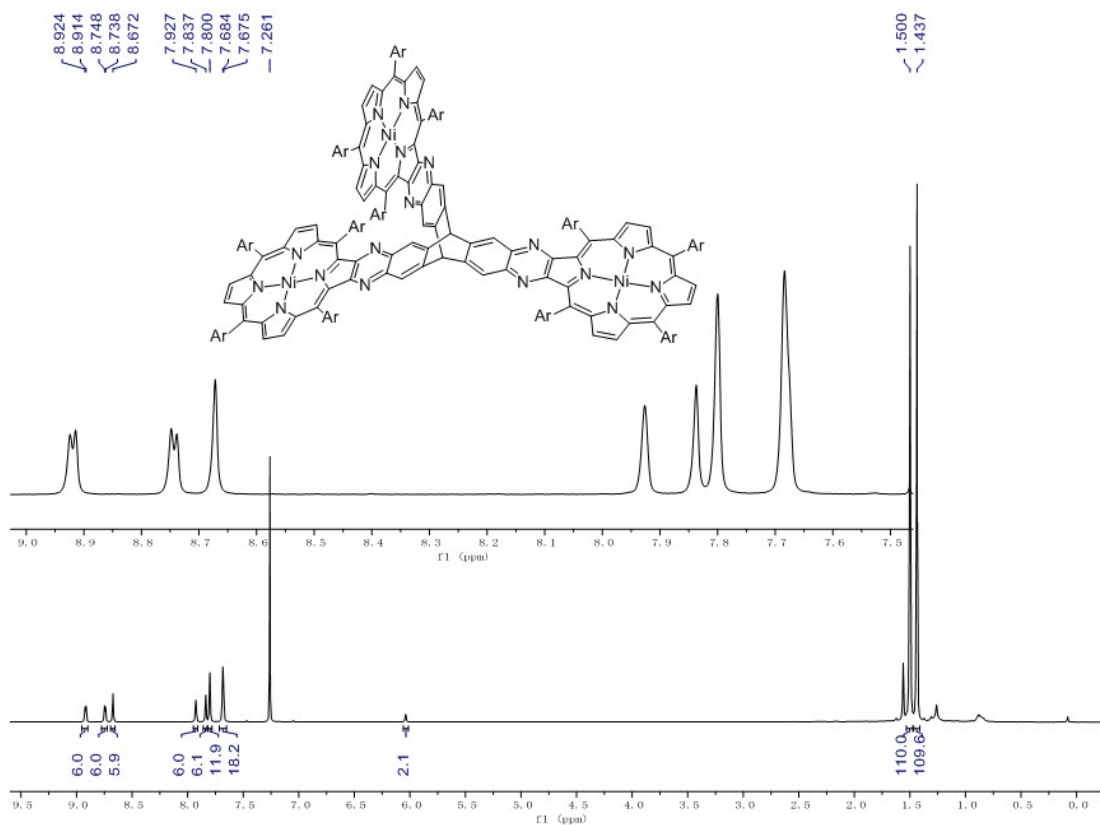

**Figure S29.** <sup>1</sup>H NMR spectrum of **12Ni** in CDCl<sub>3</sub> at 298 K

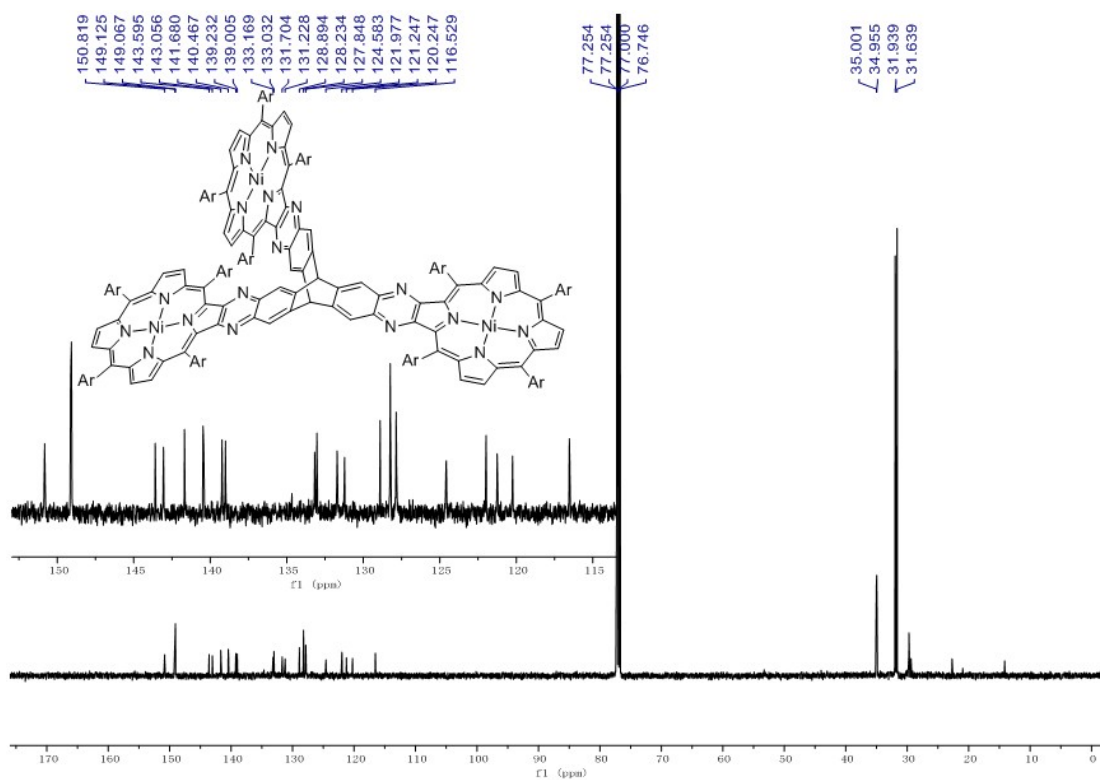

**Figure S30.** <sup>13</sup>C NMR spectrum of **12Ni** in CDCl<sub>3</sub> at 298 K

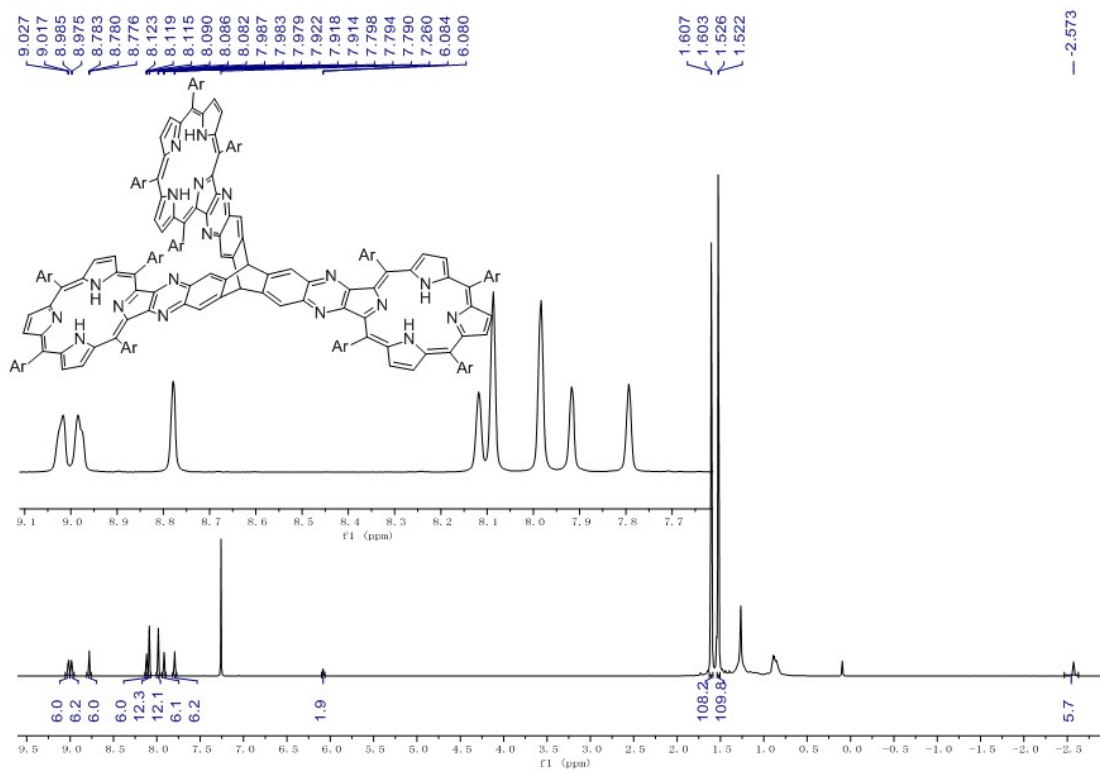

Figure S31.  $^1\text{H}$  NMR spectrum of **12H** in  $\text{CDCl}_3$  at 298 K

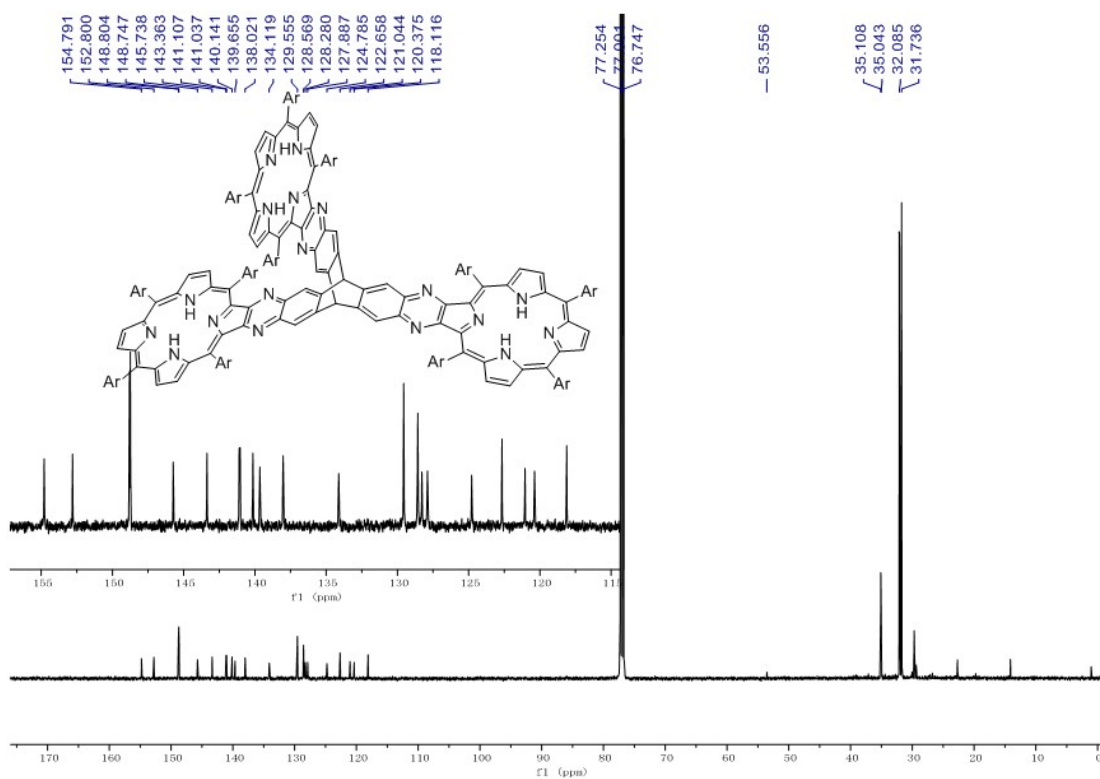

Figure S32.  $^{13}\text{C}$  NMR spectrum of **12H** in  $\text{CDCl}_3$  at 298 K

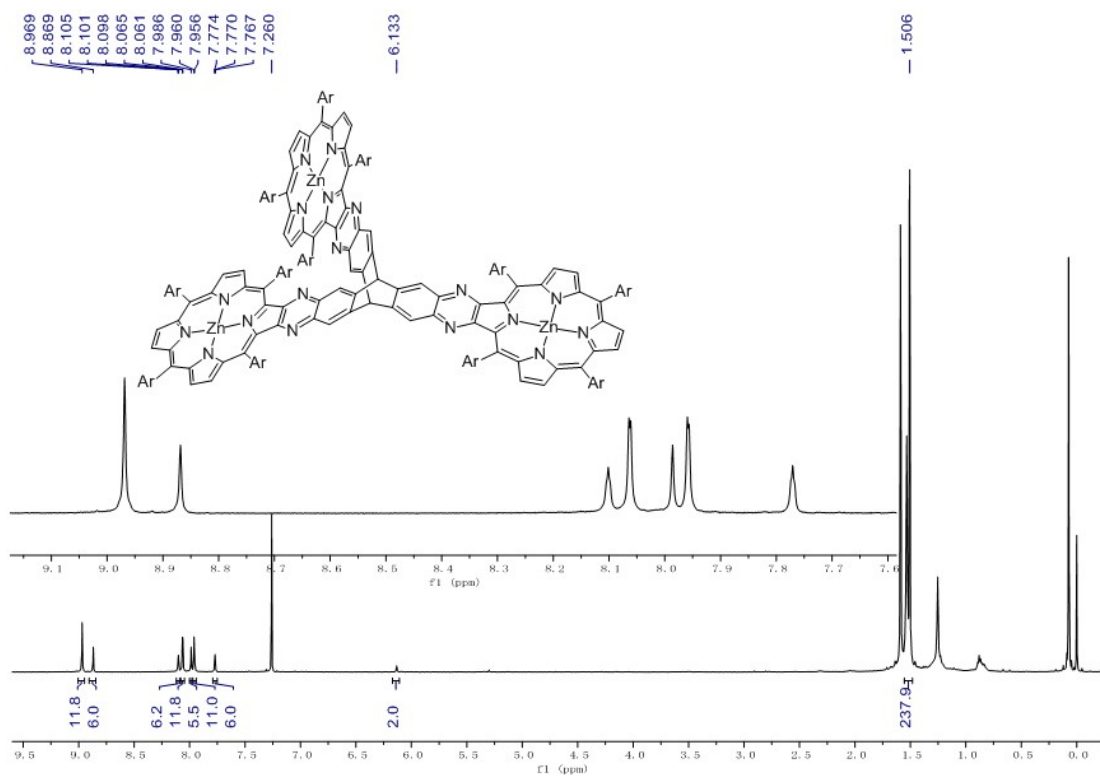

**Figure S33.  $^1\text{H}$  NMR spectrum of  $12\text{Zn}$  in  $\text{CDCl}_3$  at 298 K**

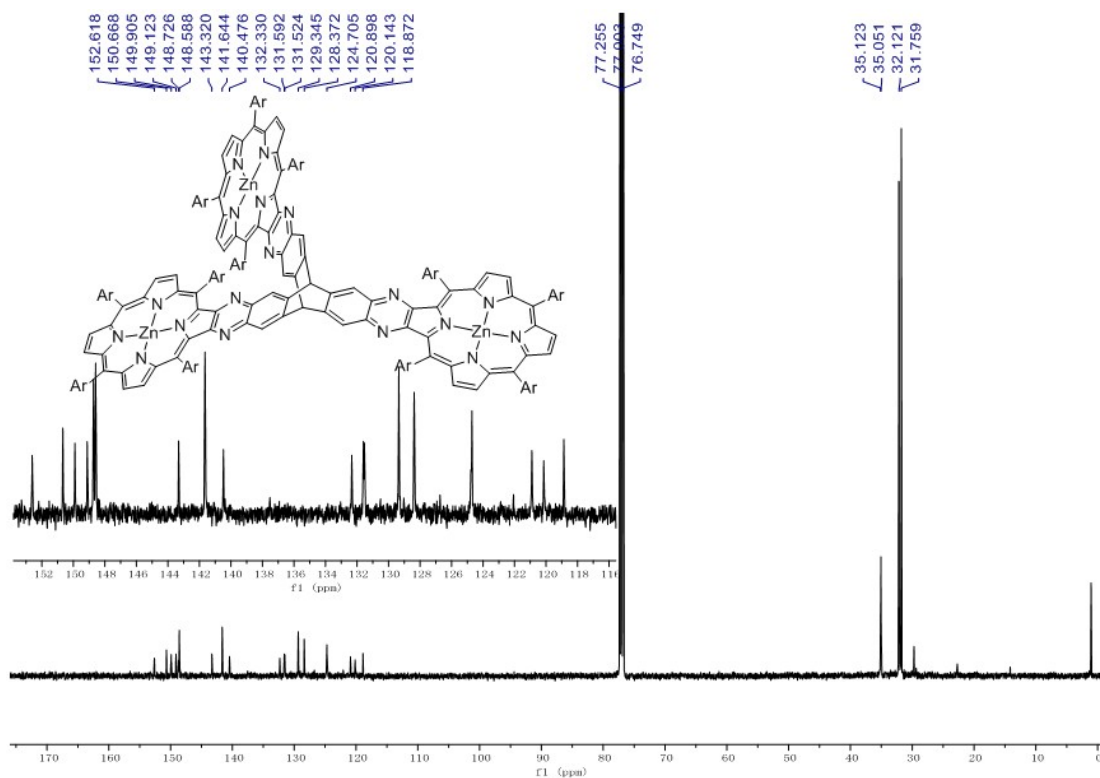

**Figure S34.  $^{13}\text{C}$  NMR spectrum of  $12\text{Zn}$  in  $\text{CDCl}_3$  at 298 K**

## UV/Vis Absorption Spectra

**Table S1.** UV/Vis absorption data

| Compound   | $\lambda$ /nm                     | Compound    | $\lambda$ /nm                |
|------------|-----------------------------------|-------------|------------------------------|
| <b>3Ni</b> | 406, 444, 556, 600                | <b>7Ni</b>  | 356, 422, 514, 649, 701      |
| <b>3H</b>  | 430, 528, 562, 597                | <b>8Ni</b>  | 321, 384, 489, 561, 796      |
| <b>3Zn</b> | 415, 440, 530, 567, 610           | <b>9Ni</b>  | 370, 408, 450, 556, 599      |
| <b>4Ni</b> | 349, 420, 472, 634                | <b>9H</b>   | 369, 436, 527, 599           |
| <b>4H</b>  | 430, 537, 609                     | <b>10Ni</b> | 411, 455, 560, 602           |
| <b>4Zn</b> | 395, 429, 472, 545, 587, 636      | <b>11Ni</b> | 408, 453, 522, 559, 600      |
| <b>5Ni</b> | 357, 402, 461, 549, 617, 659      | <b>12Ni</b> | 376, 412, 461, 560, 601      |
| <b>5H</b>  | 347, 445, 532, 612, 667           | <b>12H</b>  | 373, 441, 529, 565, 600      |
| <b>5Zn</b> | 343, 399, 459, 551, 603, 626, 653 | <b>12Zn</b> | 370, 423, 450, 532, 571, 612 |
| <b>6Ni</b> | 336, 394, 482, 666, 725           |             |                              |

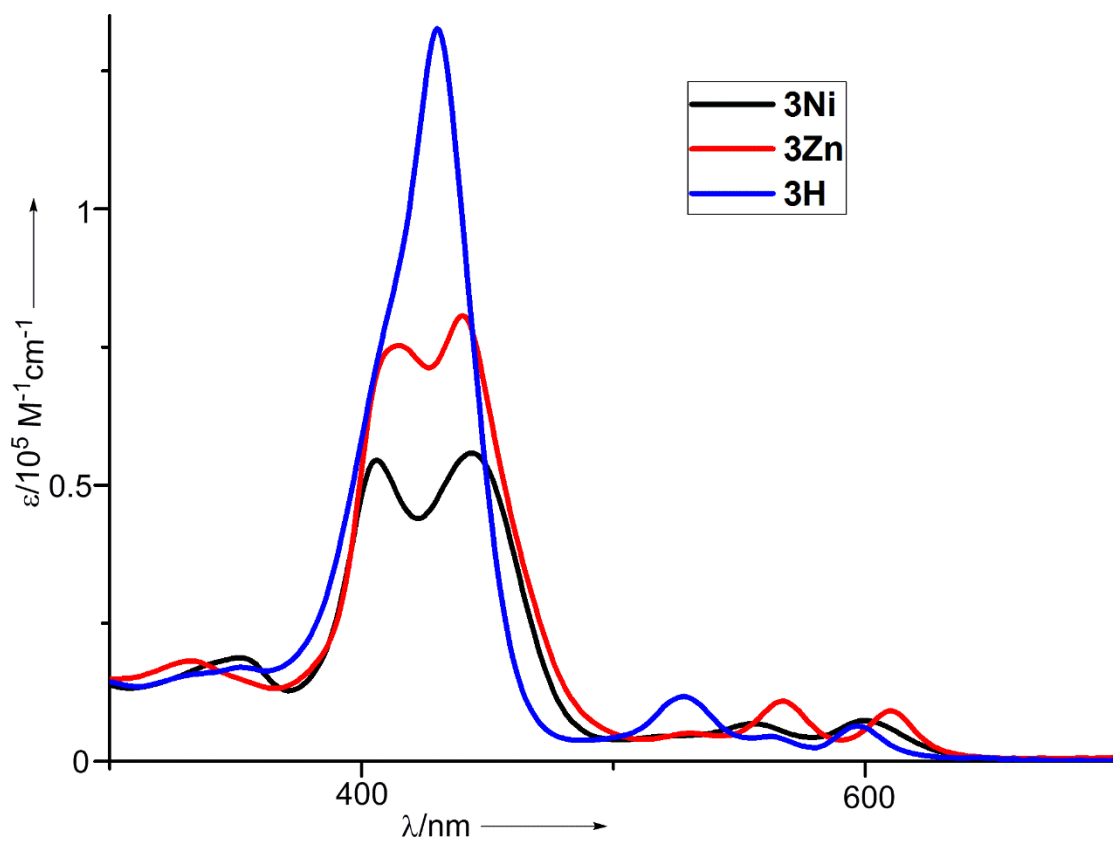

Figure S35. UV/Vis absorption spectra of **3Ni**, **3Zn**, and **3H** in  $\text{CH}_2\text{Cl}_2$ .

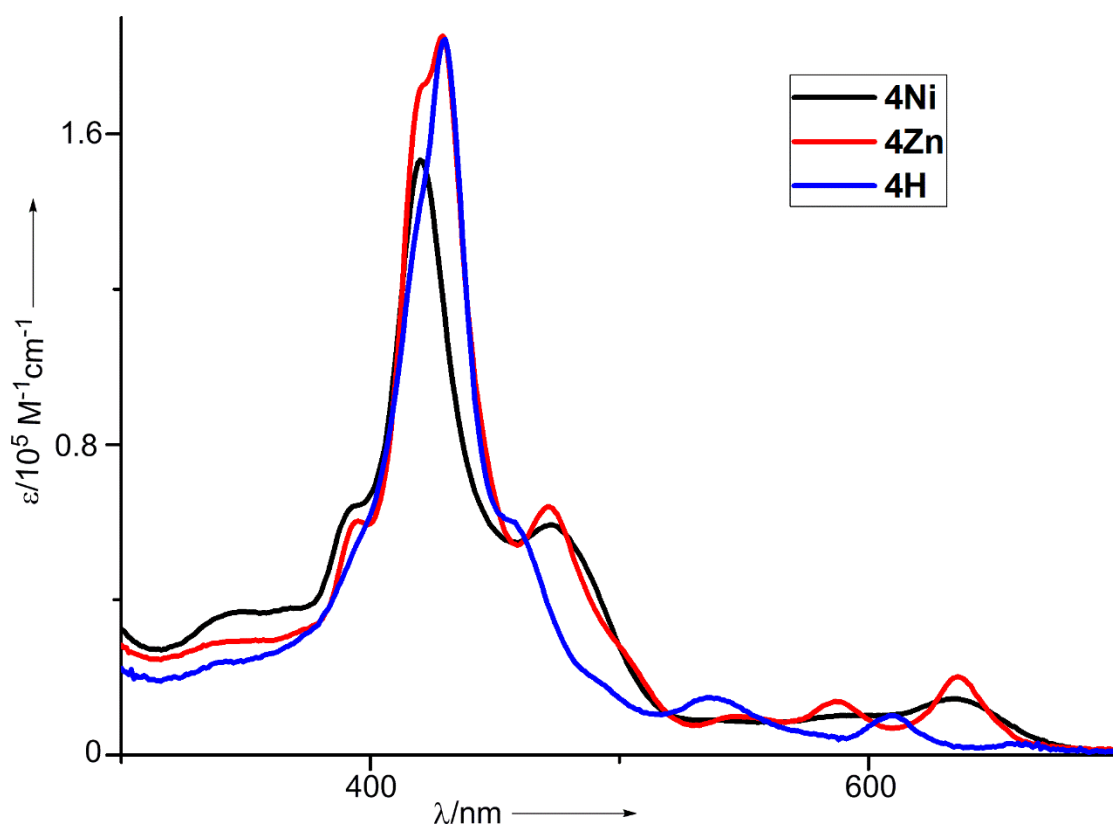

Figure S36. UV/Vis absorption spectra of **4Ni**, **4Zn** and **4H** in  $\text{CH}_2\text{Cl}_2$ .



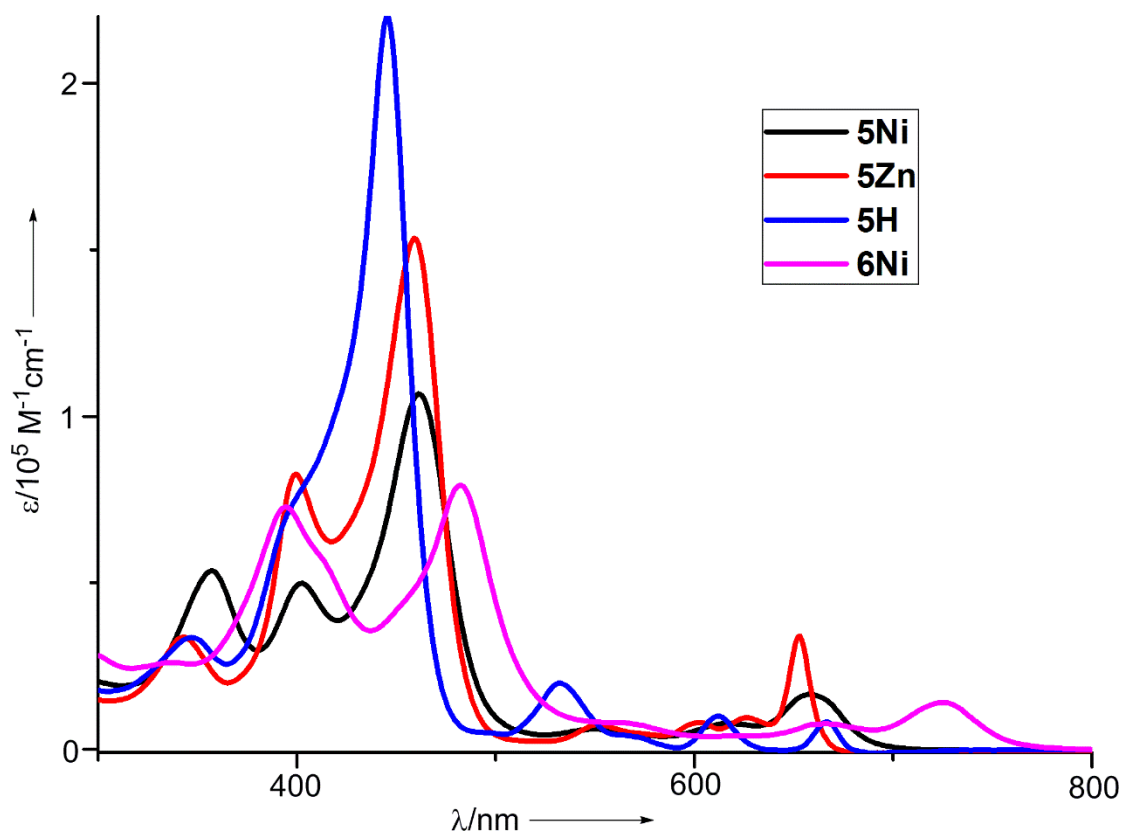

Figure S37. UV/Vis absorption spectra of 5Ni, 5Zn, 5H and 6Ni in CH<sub>2</sub>Cl<sub>2</sub>.

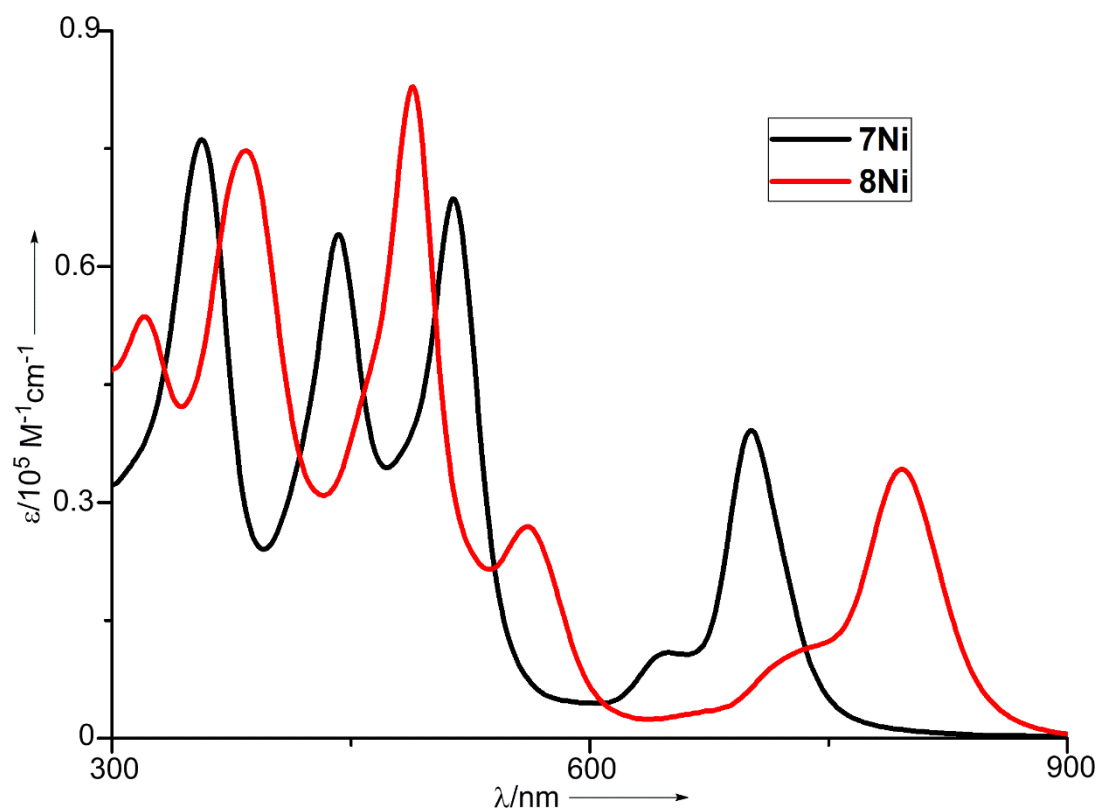

Figure S38. UV/Vis absorption spectra of 7Ni and 8Ni in CH<sub>2</sub>Cl<sub>2</sub>.

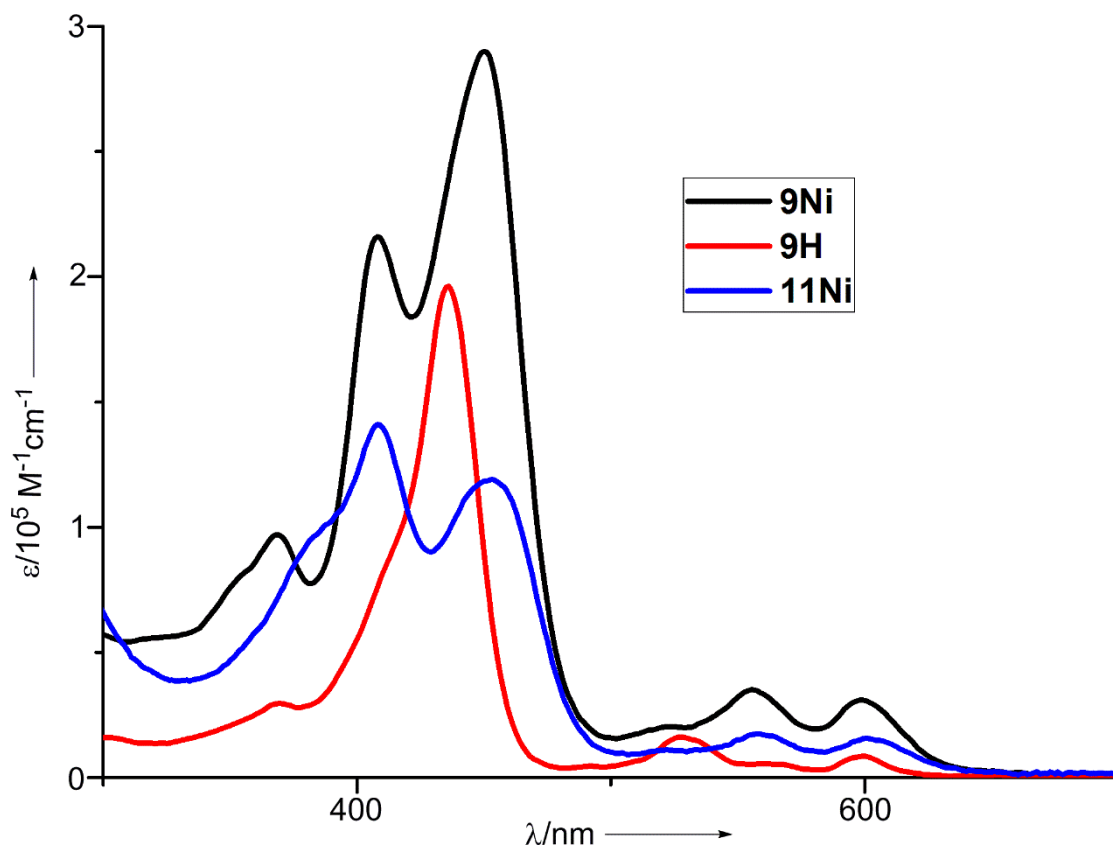

Figure S39. UV/Vis absorption spectra of 9Ni, 9H and 11Ni in CH<sub>2</sub>Cl<sub>2</sub>.

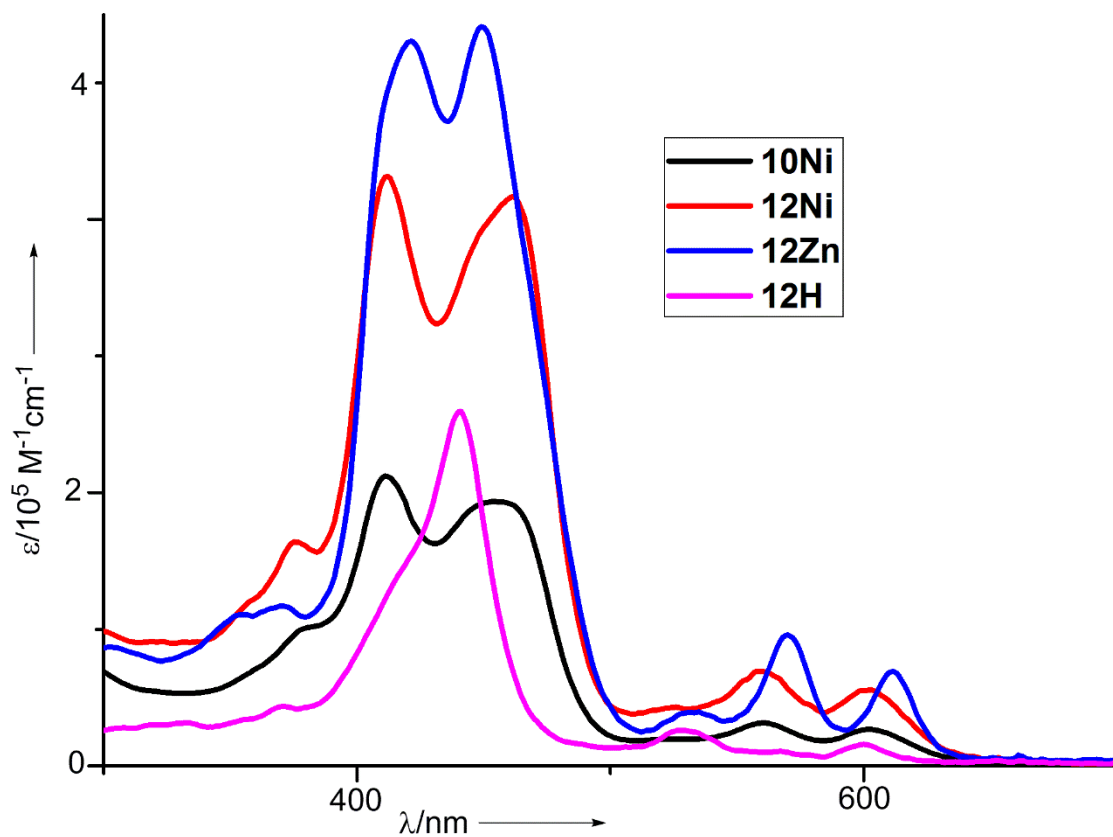

Figure S40. UV/Vis absorption spectra of 10Ni, 12Ni, 12Zn and 12H in CH<sub>2</sub>Cl<sub>2</sub>.

## Electrochemical Data

**Table S2.** CV and DPV of **3Ni**, **4Ni**, **5Ni**, **7Ni**, **8Ni**, **9Ni** and **12Ni** in CH<sub>2</sub>Cl<sub>2</sub> with 0.1 M tetra-*n*-butylammonium perchlorate (TBAP). Working electrode: glassy carbon; Counter electrode: Pt wire; Reference electrode: Ag/AgCl.

| Compound    | $E_{\text{ox.1}}$ | $E_{\text{red.1}}$ | $E_{\text{red.2}}$ | $\Delta E_{\text{HL}}$ |
|-------------|-------------------|--------------------|--------------------|------------------------|
| <b>3Ni</b>  | 0.99              | -1.09              | -1.54              | 2.08                   |
| <b>4Ni</b>  | 0.97              | -1.02              | -1.35              | 1.99                   |
| <b>5Ni</b>  | 0.95              | -0.96              | -1.38              | 1.91                   |
| <b>6Ni</b>  | 0.91              | -0.86              | -1.24              | 1.77                   |
| <b>7Ni</b>  | 0.92              | -0.85              | -1.39              | 1.77                   |
| <b>8Ni</b>  | 0.72              | -0.77              | -1.21              | 1.49                   |
| <b>9Ni</b>  | 0.98              | -1.09              | -1.56              | 2.07                   |
| <b>12Ni</b> | 1.04              | -1.07              | -1.95              | 2.11                   |

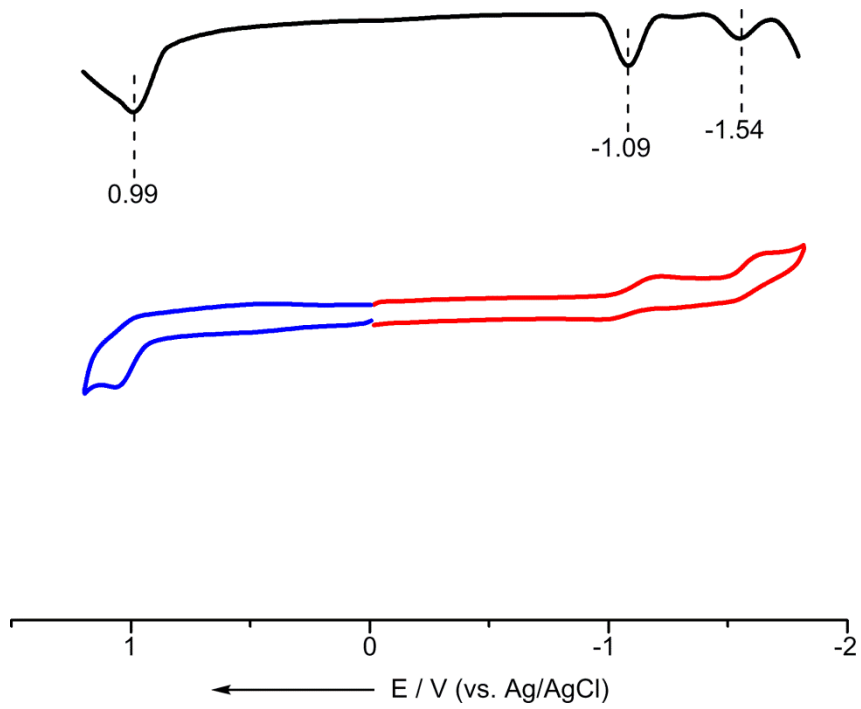

**Figure S41.** Cyclic voltammogram and differential pulse voltammogram of **3Ni**.

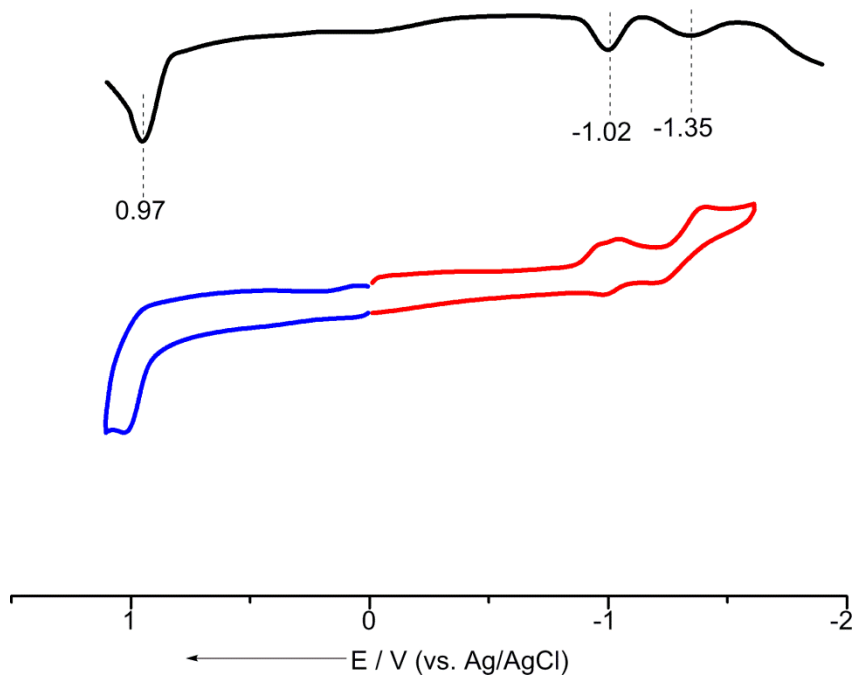

**Figure S42.** Cyclic voltammogram and differential pulse voltammogram of **4Ni**.

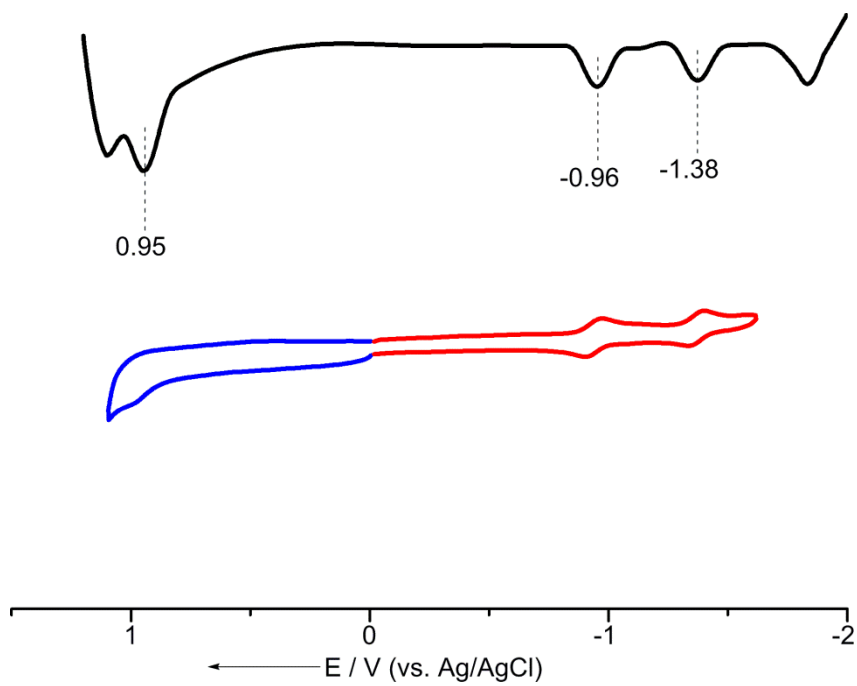

**Figure S43.** Cyclic voltammogram and differential pulse voltammogram of **5Ni**.

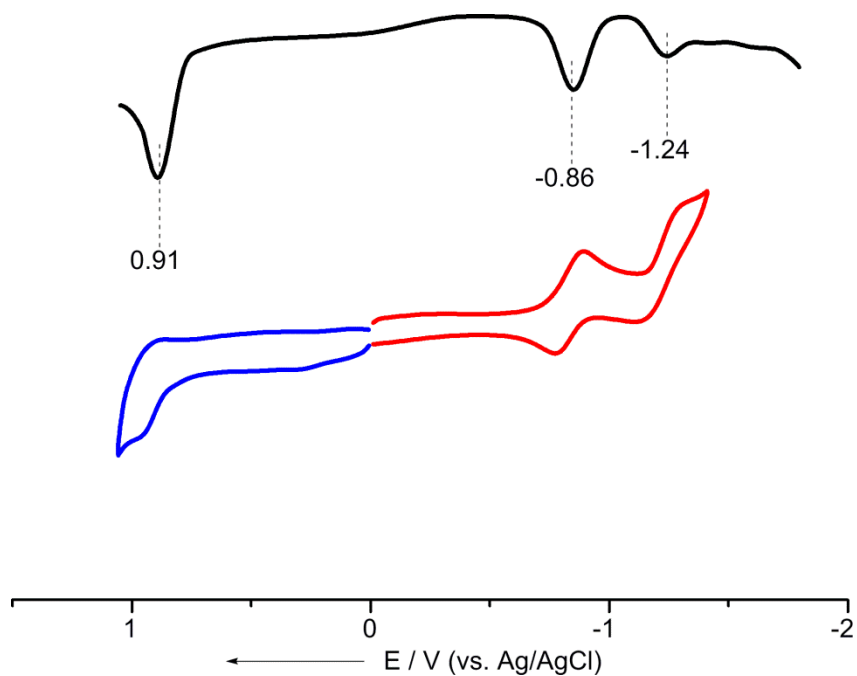

**Figure S44.** Cyclic voltammogram and differential pulse voltammogram of **6Ni**.

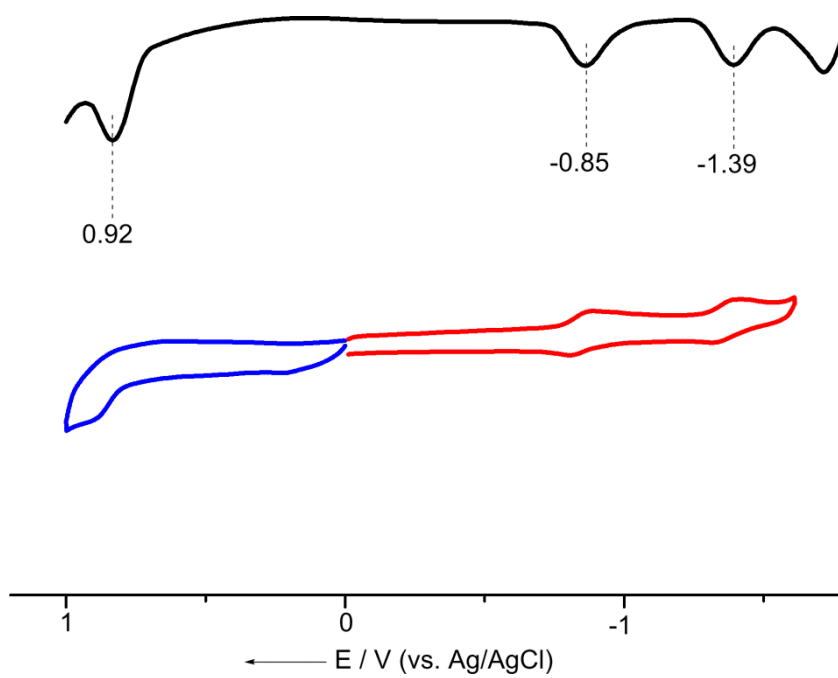

**Figure S45.** Cyclic voltammogram and differential pulse voltammogram of **7Ni**.

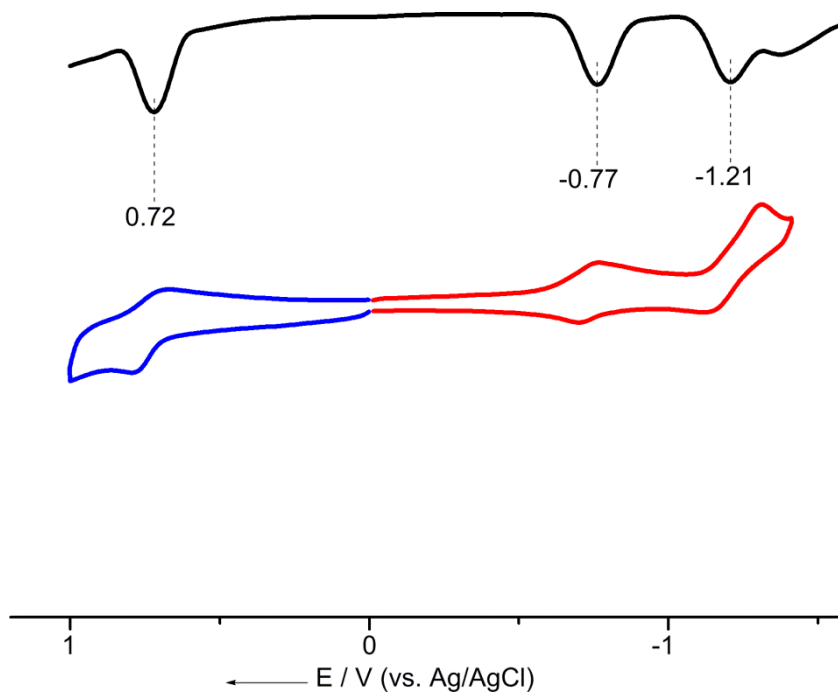

**Figure S46.** Cyclic voltammogram and differential pulse voltammogram of **8Ni**.

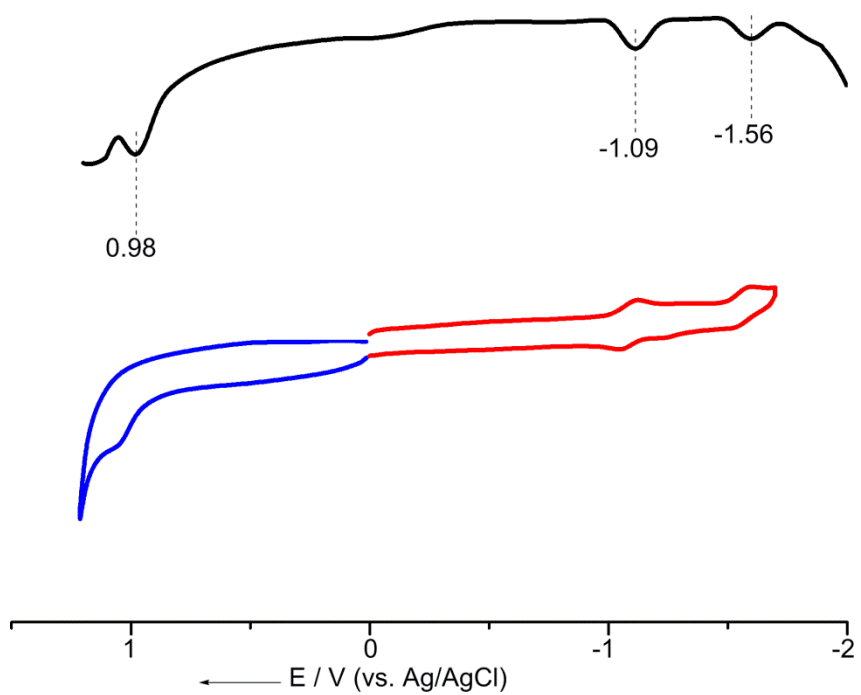

**Figure S47.** Cyclic voltammogram and differential pulse voltammogram of **9Ni**.

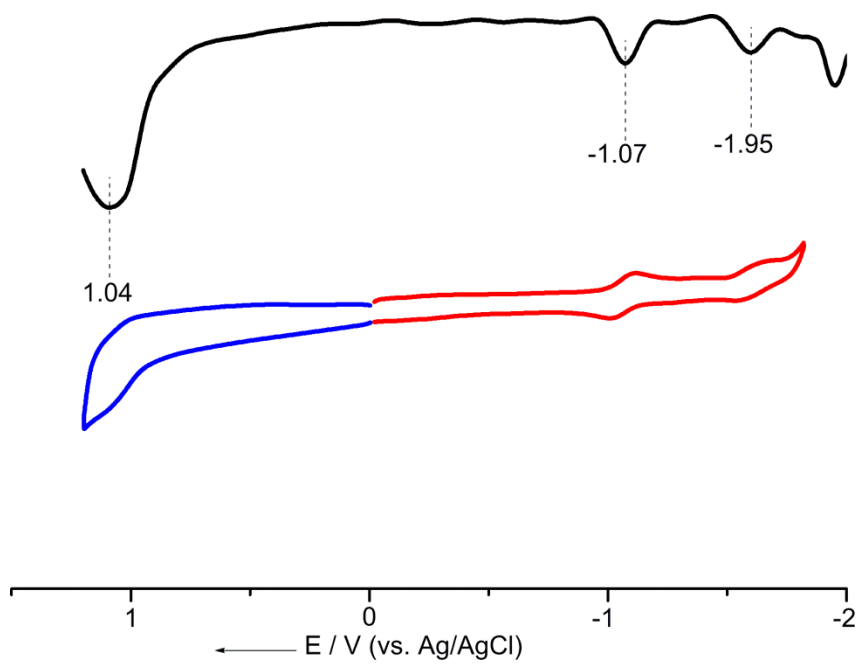

**Figure S48.** Cyclic voltammogram and differential pulse voltammogram of **12Ni**.

### **X-Ray Crystal Data**

Single crystal of **5Ni**, **6Ni**, and **7Ni** were obtained by slow vapor diffusion of MeCN into a toluene solution. Single crystal of **8Ni** was obtained by slow vapor diffusion of ethanol into a chlorobenzene solution. Single crystal of **9Ni** was obtained by slow vapor diffusion of methanol into a toluene solution. Single crystal of **10Ni** was obtained by slow vapor diffusion of dimethylcarbinol into a *p*-xylene solution. Single crystal of **12Zn** was obtained by slow vapor diffusion of methanol into and toluene solution mixed with a drop of pyridine.

A suitable crystal of **5Ni-10Ni** and **12Zn** were selected and measured on a SuperNova, Dual, Cu at zero, EosS2 diffractometer. The crystal of **5Ni**, **7Ni**, **8Ni**, **10Ni** and **12Zn** were kept at 100.01(10) K during data collection. The crystal of **6Ni** and **9Ni** were kept at 100.00(11) K, 100.00(10) K during data collection, respectively. Using Olex<sup>4</sup>, the structure of **5Ni-10Ni** and **12Zn** were solved with the olex2.solve<sup>5</sup> structure solution program using Charge Flipping and refined with the ShelXL<sup>6</sup> refinement package using Least Squares minimisation.

Crystallographic data for **5Ni-10Ni** and **12Zn** have been deposited with the Cambridge Crystallographic Data Centre as supplementary publication Nos. CCDC-2061480, 2061483, 2061481, 2061484, 2061485, 2061487 and 2061486, respectively.



a)

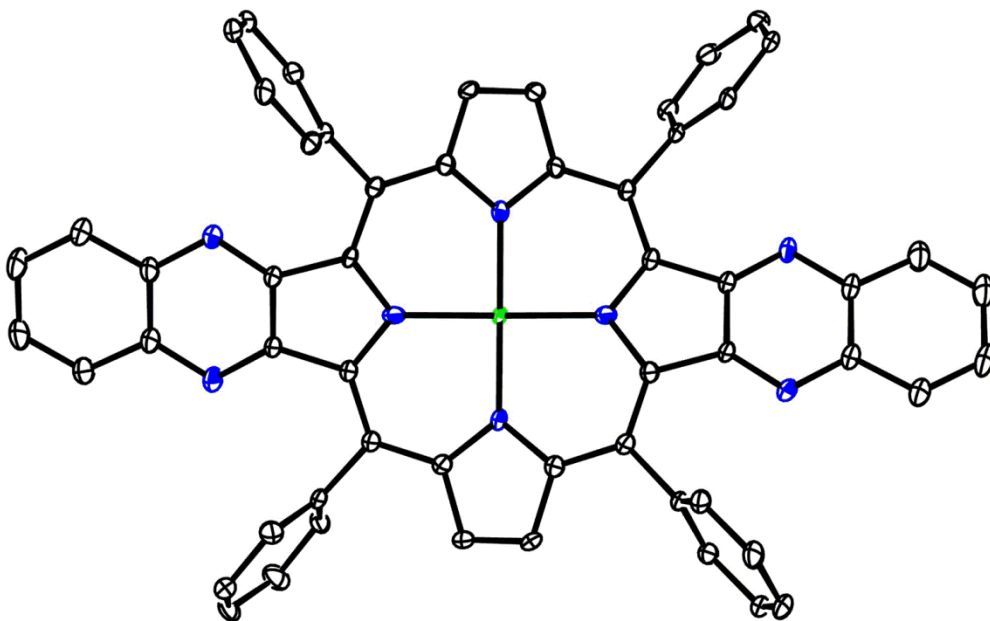

b)

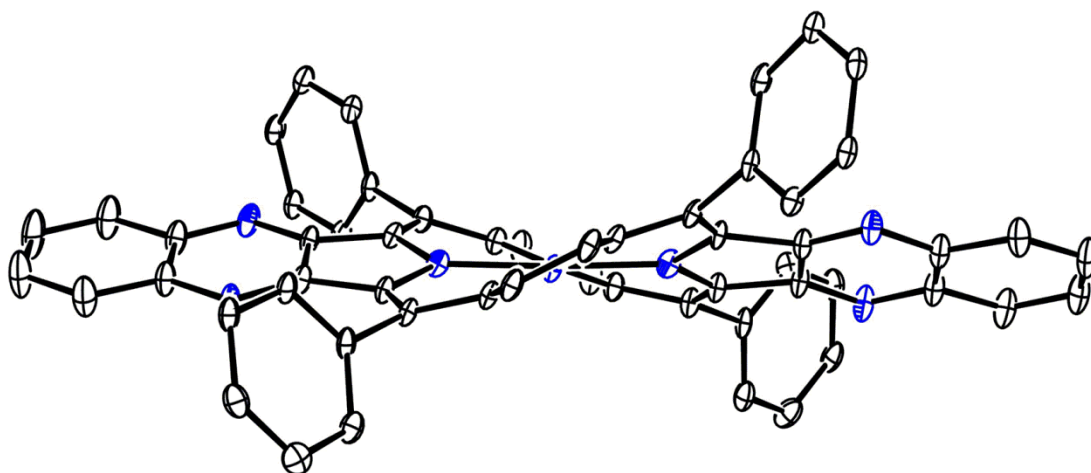

**Figure S49.** X-ray crystal structure of **5Ni**. (a) Top view, (b) side view. The thermal ellipsoids are 50% probability level. *tert*-Butyl groups and solvent molecules are omitted for clarity.

**Table S3.** Crystal data and structure refinement for **5Ni**

|                                   |                                                   |                  |
|-----------------------------------|---------------------------------------------------|------------------|
| Identification code               | exp_46_sq                                         |                  |
| Empirical formula                 | C <sub>88</sub> H <sub>96</sub> N <sub>8</sub> Ni |                  |
| Formula weight                    | 1324.43                                           |                  |
| Temperature                       | 100.01(10) K                                      |                  |
| Wavelength                        | 1.54184 Å                                         |                  |
| Crystal system                    | Triclinic                                         |                  |
| Space group                       | P-1                                               |                  |
| Unit cell dimensions              | a = 16.1391(3) Å                                  | α=111.8529(19)°. |
|                                   | b = 16.8531(4) Å                                  | β=109.1654(17)°. |
|                                   | c = 20.3578(4) Å                                  | γ= 96.7357(17)°. |
| Volume                            | 4669.80(18) Å <sup>3</sup>                        |                  |
| Z                                 | 2                                                 |                  |
| Density (calculated)              | 0.942 Mg/m <sup>3</sup>                           |                  |
| Absorption coefficient            | 0.605 mm <sup>-1</sup>                            |                  |
| F(000)                            | 1416                                              |                  |
| Crystal size                      | 0.3 x 0.3 x 0.2 mm <sup>3</sup>                   |                  |
| Theta range for data collection   | 4.367 to 66.598°.                                 |                  |
| Index ranges                      | -19<=h<=19, -20<=k<=20, -18<=l<=24                |                  |
| Reflections collected             | 48528                                             |                  |
| Independent reflections           | 16484 [R(int) = 0.0555]                           |                  |
| Completeness to theta = 66.598°   | 100.0 %                                           |                  |
| Absorption correction             | Semi-empirical from equivalents                   |                  |
| Max. and min. transmission        | 1.00000 and 0.25268                               |                  |
| Refinement method                 | Full-matrix least-squares on F <sup>2</sup>       |                  |
| Data / restraints / parameters    | 16484 / 413 / 969                                 |                  |
| Goodness-of-fit on F <sup>2</sup> | 1.082                                             |                  |
| Final R indices [I>2sigma(I)]     | R1 = 0.0723, wR2 = 0.1992                         |                  |
| R indices (all data)              | R1 = 0.0800, wR2 = 0.2067                         |                  |
| Extinction coefficient            | n/a                                               |                  |
| Largest diff. peak and hole       | 0.987 and -0.587 e.Å <sup>-3</sup>                |                  |

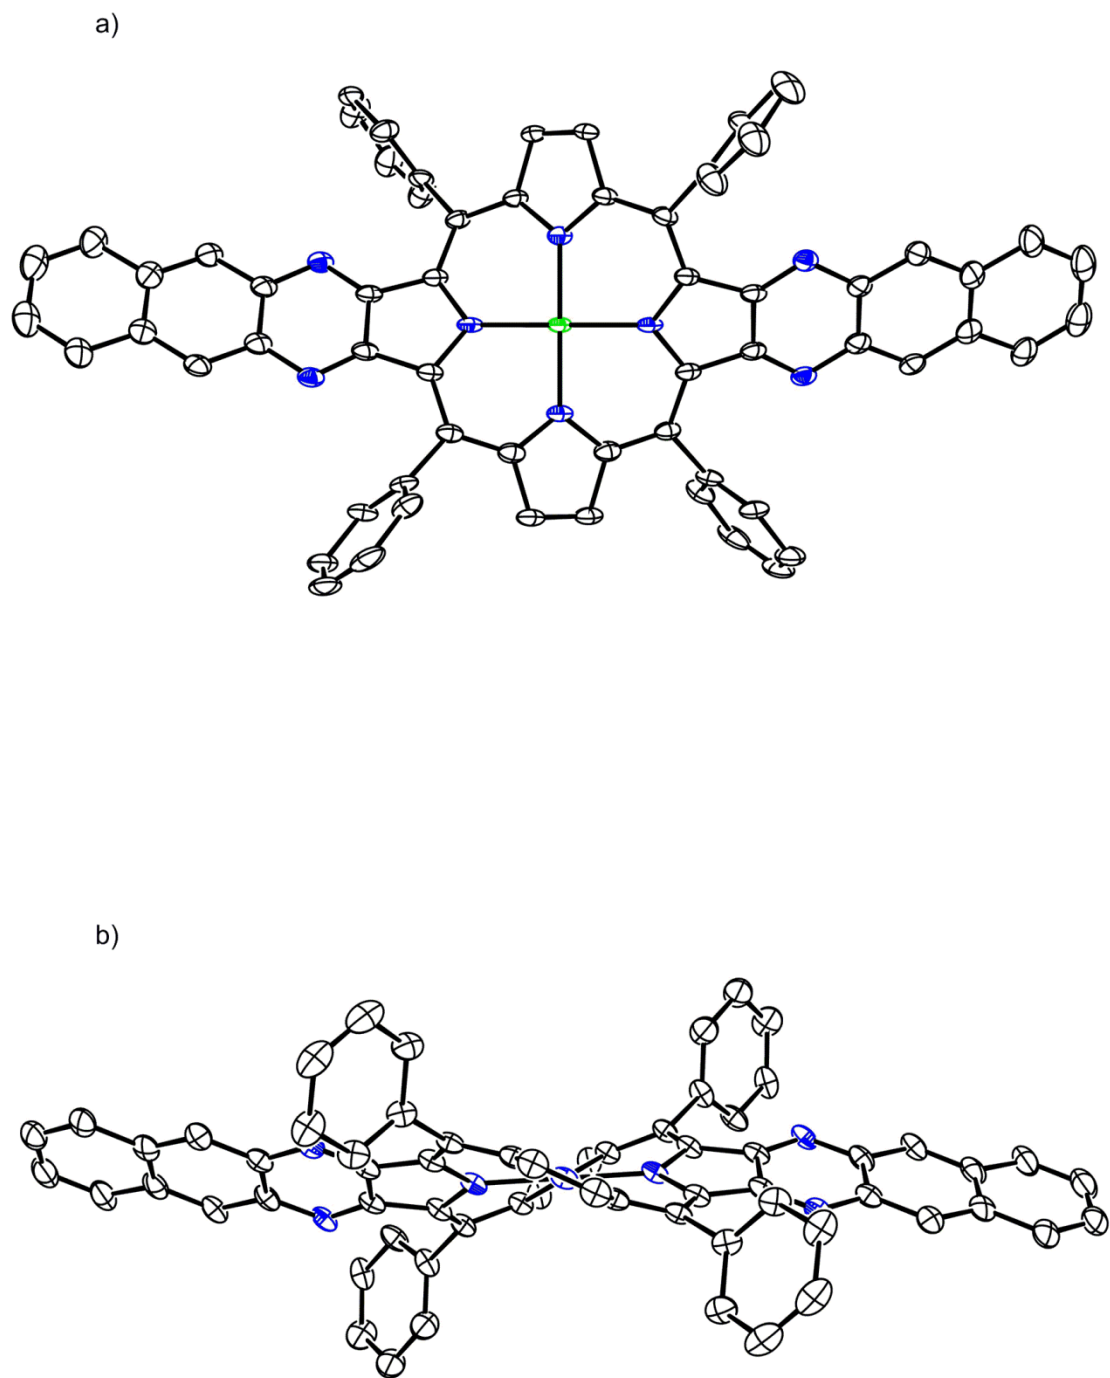

**Figure S50.** X-ray crystal structure of **6Ni**. (a) Top view, (b) side view. The thermal ellipsoids are 50% probability level. *tert*-Butyl groups and solvent molecules are omitted for clarity.

**Table S4.** Crystal data and structure refinement for **6Ni**

|                                   |                                                    |                 |
|-----------------------------------|----------------------------------------------------|-----------------|
| Identification code               | exp_132_sq                                         |                 |
| Empirical formula                 | C <sub>96</sub> H <sub>100</sub> N <sub>8</sub> Ni |                 |
| Formula weight                    | 1424.54                                            |                 |
| Temperature                       | 100.00(11) K                                       |                 |
| Wavelength                        | 1.54184 Å                                          |                 |
| Crystal system                    | Monoclinic                                         |                 |
| Space group                       | I 1 2/a 1                                          |                 |
| Unit cell dimensions              | a = 17.6246(4) Å                                   | α = 90°.        |
|                                   | b = 17.1567(3) Å                                   | β = 97.990(2)°. |
|                                   | c = 30.5564(9) Å                                   | γ = 90°.        |
| Volume                            | 9149.9(4) Å <sup>3</sup>                           |                 |
| Z                                 | 4                                                  |                 |
| Density (calculated)              | 1.034 Mg/m <sup>3</sup>                            |                 |
| Absorption coefficient            | 0.649 mm <sup>-1</sup>                             |                 |
| F(000)                            | 3040                                               |                 |
| Crystal size                      | 0.3 x 0.01 x 0.01 mm <sup>3</sup>                  |                 |
| Theta range for data collection   | 4.420 to 66.598°.                                  |                 |
| Index ranges                      | -20 ≤ h ≤ 20, -20 ≤ k ≤ 18, -36 ≤ l ≤ 36           |                 |
| Reflections collected             | 28976                                              |                 |
| Independent reflections           | 8079 [R(int) = 0.0523]                             |                 |
| Completeness to theta = 66.599°   | 99.9 %                                             |                 |
| Absorption correction             | Semi-empirical from equivalents                    |                 |
| Max. and min. transmission        | 1.00000 and 0.66504                                |                 |
| Refinement method                 | Full-matrix least-squares on F <sup>2</sup>        |                 |
| Data / restraints / parameters    | 8079 / 376 / 620                                   |                 |
| Goodness-of-fit on F <sup>2</sup> | 1.033                                              |                 |
| Final R indices [I > 2σ(I)]       | R1 = 0.0823, wR2 = 0.2363                          |                 |
| R indices (all data)              | R1 = 0.0926, wR2 = 0.2500                          |                 |
| Extinction coefficient            | n/a                                                |                 |
| Largest diff. peak and hole       | 0.818 and -0.495 e.Å <sup>-3</sup>                 |                 |

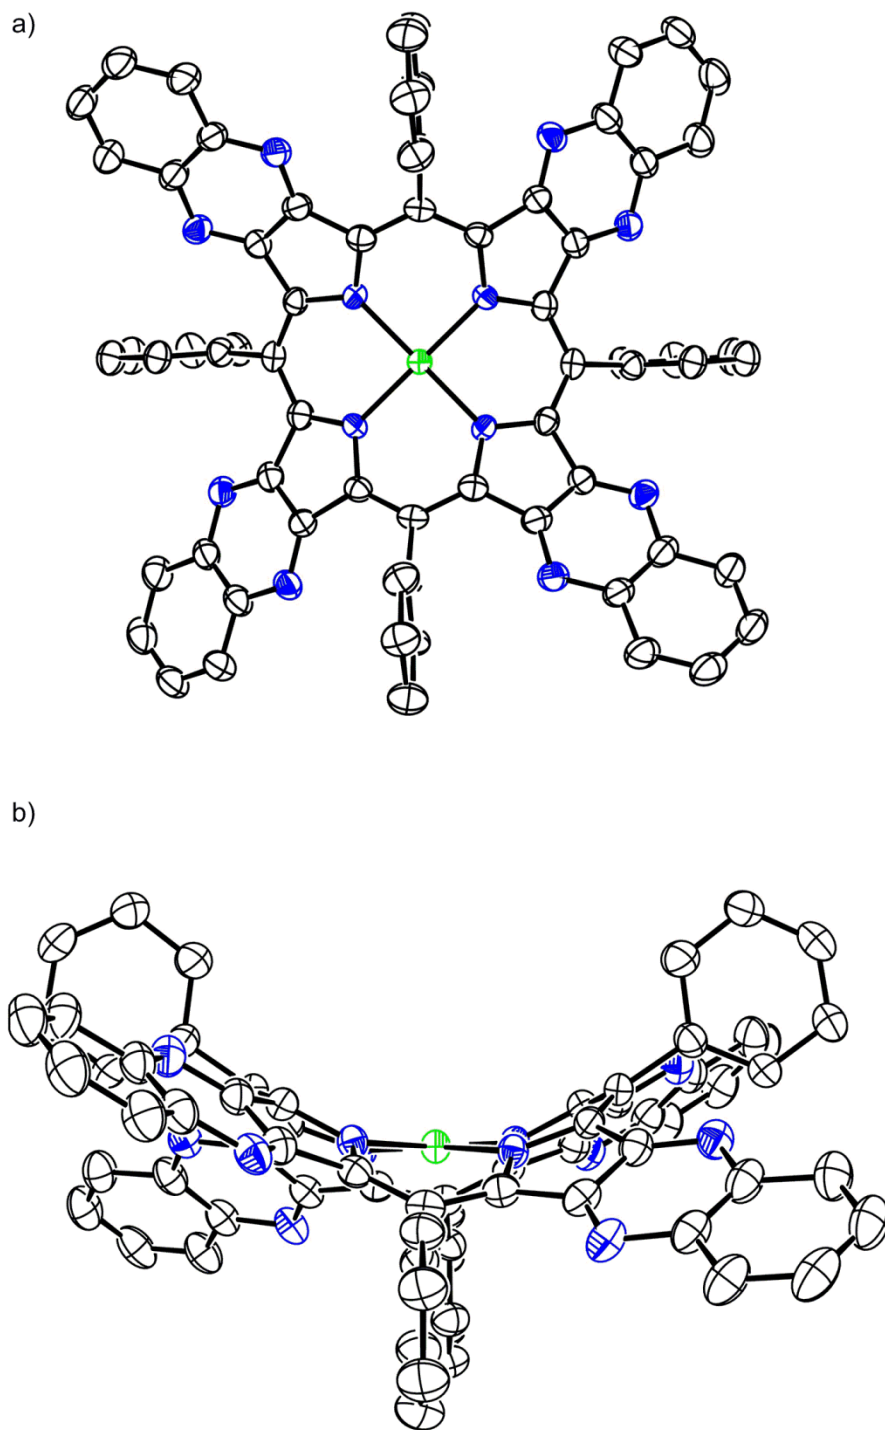

**Figure S51.** X-ray crystal structure of **7Ni**. (a) Top view, (b) side view. The thermal ellipsoids are 50% probability level. *tert*-Butyl groups and solvent molecules are omitted for clarity.

**Table S5.** Crystal data and structure refinement for **7Ni**

|                                   |                                                      |          |
|-----------------------------------|------------------------------------------------------|----------|
| Identification code               | exp_125_sq                                           |          |
| Empirical formula                 | C <sub>100</sub> H <sub>100</sub> N <sub>12</sub> Ni |          |
| Formula weight                    | 1528.62                                              |          |
| Temperature                       | 100.01(10) K                                         |          |
| Wavelength                        | 1.54184 Å                                            |          |
| Crystal system                    | Tetragonal                                           |          |
| Space group                       | P-421c                                               |          |
| Unit cell dimensions              | a = 21.8548(8) Å                                     | α = 90°. |
|                                   | b = 21.8548(8) Å                                     | β = 90°. |
|                                   | c = 9.0971(5) Å                                      | γ = 90°. |
| Volume                            | 4345.1(4) Å <sup>3</sup>                             |          |
| Z                                 | 2                                                    |          |
| Density (calculated)              | 1.168 Mg/m <sup>3</sup>                              |          |
| Absorption coefficient            | 0.731 mm <sup>-1</sup>                               |          |
| F(000)                            | 1624                                                 |          |
| Crystal size                      | 0.3 x 0.01 x 0.01 mm <sup>3</sup>                    |          |
| Theta range for data collection   | 4.046 to 66.590°.                                    |          |
| Index ranges                      | -26<=h<=26, -25<=k<=26, -10<=l<=4                    |          |
| Reflections collected             | 28758                                                |          |
| Independent reflections           | 3835 [R(int) = 0.1398]                               |          |
| Completeness to theta = 66.590°   | 100.0 %                                              |          |
| Absorption correction             | Semi-empirical from equivalents                      |          |
| Max. and min. transmission        | 1.00000 and 0.06285                                  |          |
| Refinement method                 | Full-matrix least-squares on F <sup>2</sup>          |          |
| Data / restraints / parameters    | 3835 / 222 / 322                                     |          |
| Goodness-of-fit on F <sup>2</sup> | 1.044                                                |          |
| Final R indices [I>2σ(I)]         | R1 = 0.0630, wR2 = 0.1652                            |          |
| R indices (all data)              | R1 = 0.0776, wR2 = 0.1803                            |          |
| Absolute structure parameter      | -0.05(6)                                             |          |
| Extinction coefficient            | n/a                                                  |          |
| Largest diff. peak and hole       | 0.377 and -0.312 e.Å <sup>-3</sup>                   |          |

a)

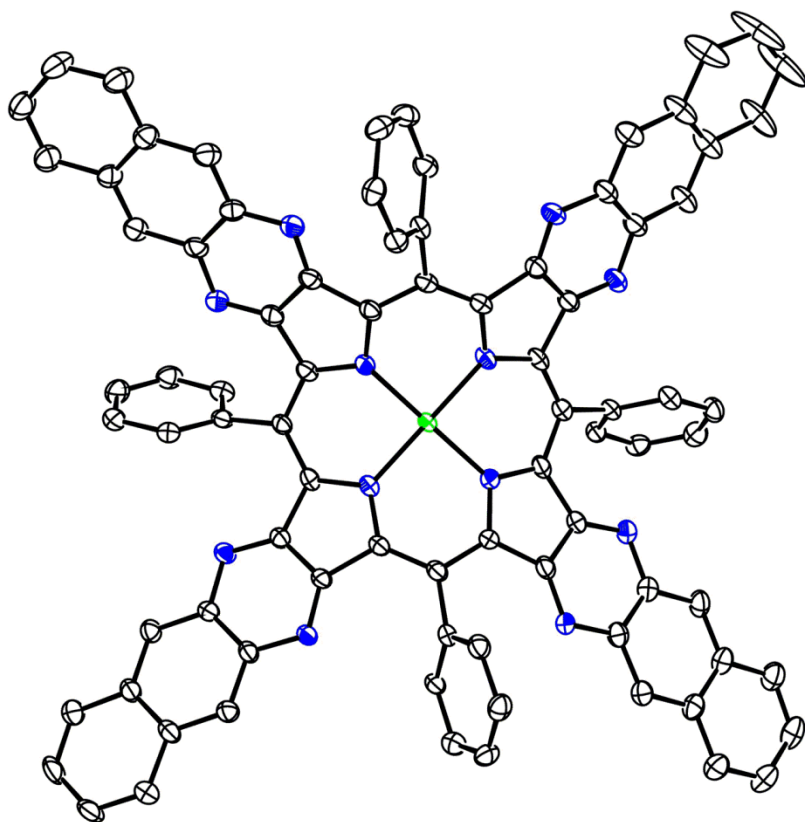

b)

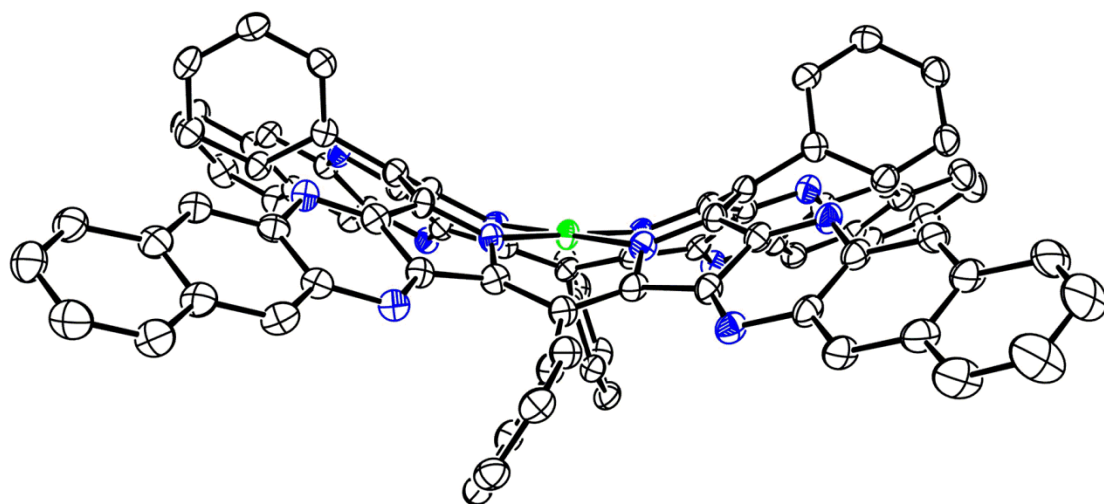

**Figure S52.** X-ray crystal structure of **8Ni**. (a) Top view, (b) side view. The thermal ellipsoids are 50% probability level. *tert*-Butyl groups and solvent molecules are omitted for clarity.

**Table S6.** Crystal data and structure refinement for **8Ni**

|                                   |                                                      |                   |
|-----------------------------------|------------------------------------------------------|-------------------|
| Identification code               | exp_367_sq                                           |                   |
| Empirical formula                 | C <sub>116</sub> H <sub>108</sub> N <sub>12</sub> Ni |                   |
| Formula weight                    | 1728.85                                              |                   |
| Temperature                       | 100.01(10) K                                         |                   |
| Wavelength                        | 1.54184 Å                                            |                   |
| Crystal system                    | Monoclinic                                           |                   |
| Space group                       | P 1 21/n 1                                           |                   |
| Unit cell dimensions              | a = 9.47195(18) Å                                    | α = 90°.          |
|                                   | b = 33.8469(6) Å                                     | β = 92.7229(17)°. |
|                                   | c = 34.0796(6) Å                                     | γ = 90°.          |
| Volume                            | 10913.5(4) Å <sup>3</sup>                            |                   |
| Z                                 | 4                                                    |                   |
| Density (calculated)              | 1.052 Mg/m <sup>3</sup>                              |                   |
| Absorption coefficient            | 0.635 mm <sup>-1</sup>                               |                   |
| F(000)                            | 3664                                                 |                   |
| Crystal size                      | 0.1 x 0.1 x 0.01 mm <sup>3</sup>                     |                   |
| Theta range for data collection   | 4.109 to 66.600°.                                    |                   |
| Index ranges                      | -11 ≤ h ≤ 11, -40 ≤ k ≤ 40, -40 ≤ l ≤ 40             |                   |
| Reflections collected             | 146801                                               |                   |
| Independent reflections           | 19282 [R(int) = 0.0839]                              |                   |
| Completeness to theta = 66.600°   | 100.0 %                                              |                   |
| Absorption correction             | Semi-empirical from equivalents                      |                   |
| Max. and min. transmission        | 1.00000 and 0.33519                                  |                   |
| Refinement method                 | Full-matrix least-squares on F <sup>2</sup>          |                   |
| Data / restraints / parameters    | 19282 / 491 / 1217                                   |                   |
| Goodness-of-fit on F <sup>2</sup> | 1.056                                                |                   |
| Final R indices [I > 2σ(I)]       | R1 = 0.0677, wR2 = 0.1849                            |                   |
| R indices (all data)              | R1 = 0.0897, wR2 = 0.1962                            |                   |
| Extinction coefficient            | n/a                                                  |                   |
| Largest diff. peak and hole       | 1.802 and -0.532 e.Å <sup>-3</sup>                   |                   |



a)

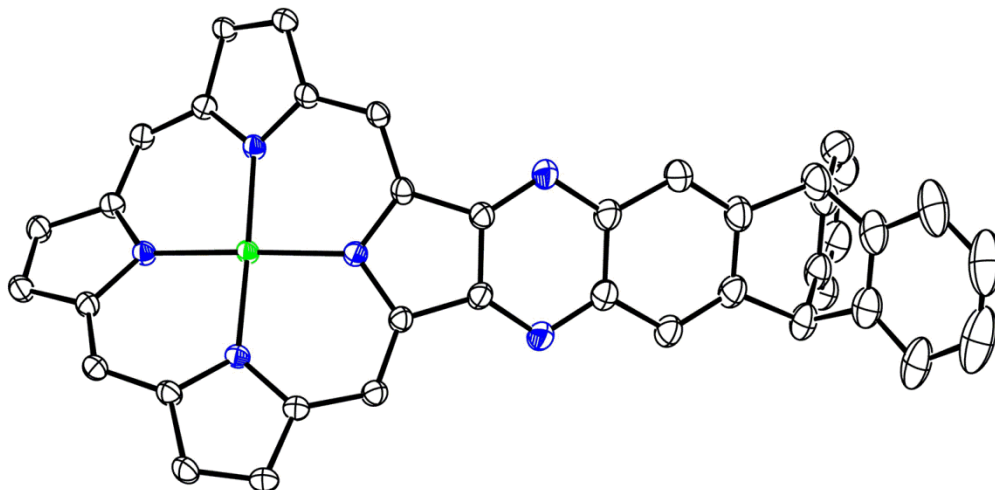

b)

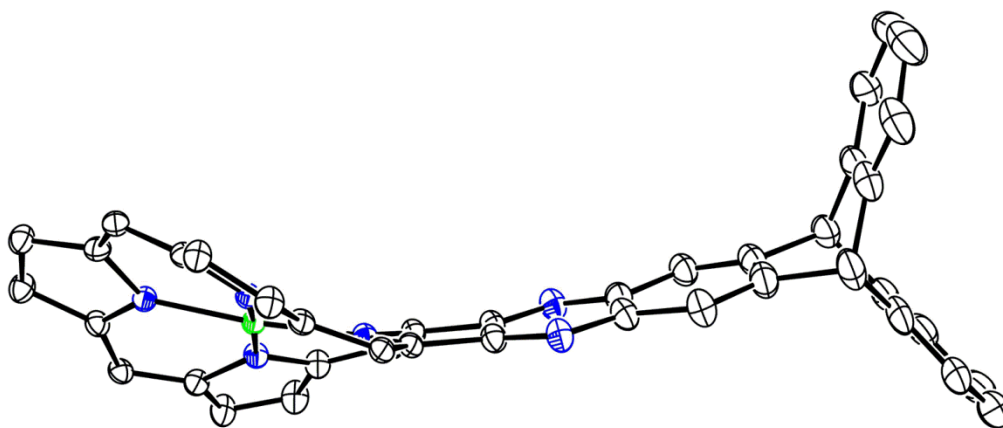

**Figure S53.** X-ray crystal structure of **9Ni**. (a) Top view, (b) side view. The thermal ellipsoids are 30% probability level. 3,5-di-*tert*-butylphenyl groups and solvent molecules are omitted for clarity.

**Table S7.** Crystal data and structure refinement for **9Ni**

|                                   |                                                     |                  |
|-----------------------------------|-----------------------------------------------------|------------------|
| Identification code               | exp_375_sq                                          |                  |
| Empirical formula                 | C <sub>103</sub> H <sub>110</sub> N <sub>6</sub> Ni |                  |
| Formula weight                    | 1490.67                                             |                  |
| Temperature                       | 100.00(10) K                                        |                  |
| Wavelength                        | 1.54184 Å                                           |                  |
| Crystal system                    | Triclinic                                           |                  |
| Space group                       | P-1                                                 |                  |
| Unit cell dimensions              | a = 14.9984(3) Å                                    | α=103.3287(16)°. |
|                                   | b = 15.1050(3) Å                                    | β= 95.3569(16)°. |
|                                   | c = 19.2933(4) Å                                    | γ= 97.8627(16)°. |
| γ                                 |                                                     |                  |
| Volume                            | 4177.68(14) Å <sup>3</sup>                          |                  |
| Z                                 | 2                                                   |                  |
| Density (calculated)              | 1.185 Mg/m <sup>3</sup>                             |                  |
| Absorption coefficient            | 0.724 mm <sup>-1</sup>                              |                  |
| F(000)                            | 1596                                                |                  |
| Crystal size                      | 0.3 x 0.2 x 0.2 mm <sup>3</sup>                     |                  |
| Theta range for data collection   | 4.061 to 66.596°.                                   |                  |
| Index ranges                      | -16<=h<=17, -17<=k<=17, -22<=l<=22                  |                  |
| Reflections collected             | 58314                                               |                  |
| Independent reflections           | 14724 [R(int) = 0.0562]                             |                  |
| Completeness to theta = 66.596°   | 99.9 %                                              |                  |
| Absorption correction             | Semi-empirical from equivalents                     |                  |
| Max. and min. transmission        | 1.00000 and 0.71397                                 |                  |
| Refinement method                 | Full-matrix least-squares on F <sup>2</sup>         |                  |
| Data / restraints / parameters    | 14724 / 0 / 1078                                    |                  |
| Goodness-of-fit on F <sup>2</sup> | 1.043                                               |                  |
| Final R indices [I>2sigma(I)]     | R1 = 0.0777, wR2 = 0.2250                           |                  |
| R indices (all data)              | R1 = 0.0936, wR2 = 0.2433                           |                  |
| Extinction coefficient            | n/a                                                 |                  |
| Largest diff. peak and hole       | 1.473 and -0.547 e.Å <sup>-3</sup>                  |                  |

a)

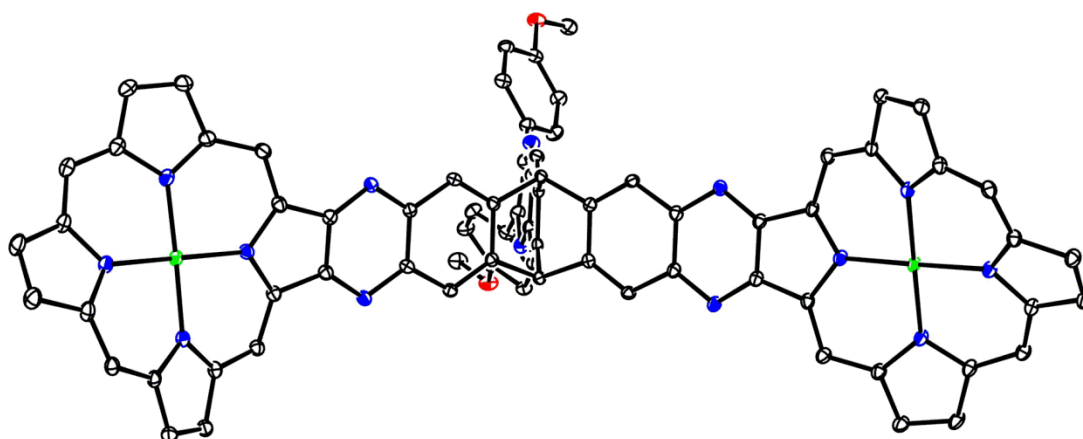

b)

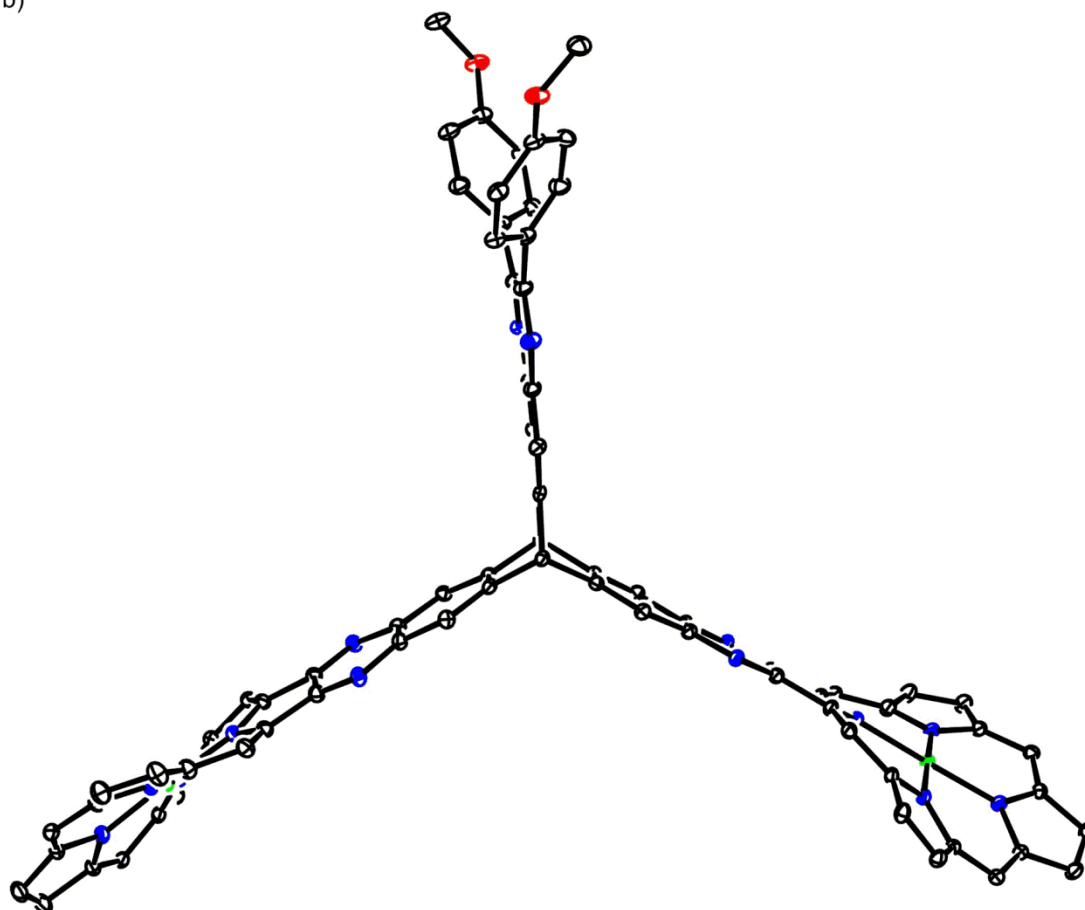

**Figure S54.** X-ray crystal structure of **10Ni**. (a) Top view, (b) side view. The thermal ellipsoids are 30% probability level. 3,5-di-*tert*-butylphenyl groups and solvent molecules are omitted for clarity.

**Table S8.** Crystal data and structure refinement for **10Ni**

|                                   |                                                                                  |                   |
|-----------------------------------|----------------------------------------------------------------------------------|-------------------|
| Identification code               | exp_548_sq                                                                       |                   |
| Empirical formula                 | C <sub>188</sub> H <sub>202</sub> N <sub>14</sub> Ni <sub>2</sub> O <sub>2</sub> |                   |
| Formula weight                    | 2807.04                                                                          |                   |
| Temperature                       | 100.01(10) K                                                                     |                   |
| Wavelength                        | 1.54184 Å                                                                        |                   |
| Crystal system                    | Triclinic                                                                        |                   |
| Space group                       | P-1                                                                              |                   |
| Unit cell dimensions              | a = 16.7663(2) Å                                                                 | α = 78.6397(9)°.  |
|                                   | b = 23.8905(3) Å                                                                 | β = 87.1794(10)°. |
|                                   | c = 28.1890(3) Å                                                                 | γ = 78.6812(10)°. |
| Volume                            | 10854.1(2) Å <sup>3</sup>                                                        |                   |
| Z                                 | 2                                                                                |                   |
| Density (calculated)              | 0.859 Mg/m <sup>3</sup>                                                          |                   |
| Absorption coefficient            | 0.545 mm <sup>-1</sup>                                                           |                   |
| F(000)                            | 3000                                                                             |                   |
| Crystal size                      | 0.2 x 0.2 x 0.1 mm <sup>3</sup>                                                  |                   |
| Theta range for data collection   | 3.575 to 66.601°.                                                                |                   |
| Index ranges                      | -17<=h<=19, -28<=k<=28, -33<=l<=33                                               |                   |
| Reflections collected             | 154157                                                                           |                   |
| Independent reflections           | 38297 [R(int) = 0.0383]                                                          |                   |
| Completeness to theta = 66.601°   | 99.9 %                                                                           |                   |
| Absorption correction             | Semi-empirical from equivalents                                                  |                   |
| Max. and min. transmission        | 1.00000 and 0.82446                                                              |                   |
| Refinement method                 | Full-matrix least-squares on F <sup>2</sup>                                      |                   |
| Data / restraints / parameters    | 38297 / 693 / 1904                                                               |                   |
| Goodness-of-fit on F <sup>2</sup> | 1.055                                                                            |                   |
| Final R indices [I>2sigma(I)]     | R1 = 0.0669, wR2 = 0.1761                                                        |                   |
| R indices (all data)              | R1 = 0.0768, wR2 = 0.1833                                                        |                   |
| Extinction coefficient            | n/a                                                                              |                   |
| Largest diff. peak and hole       | 1.013 and -0.532 e.Å <sup>-3</sup>                                               |                   |

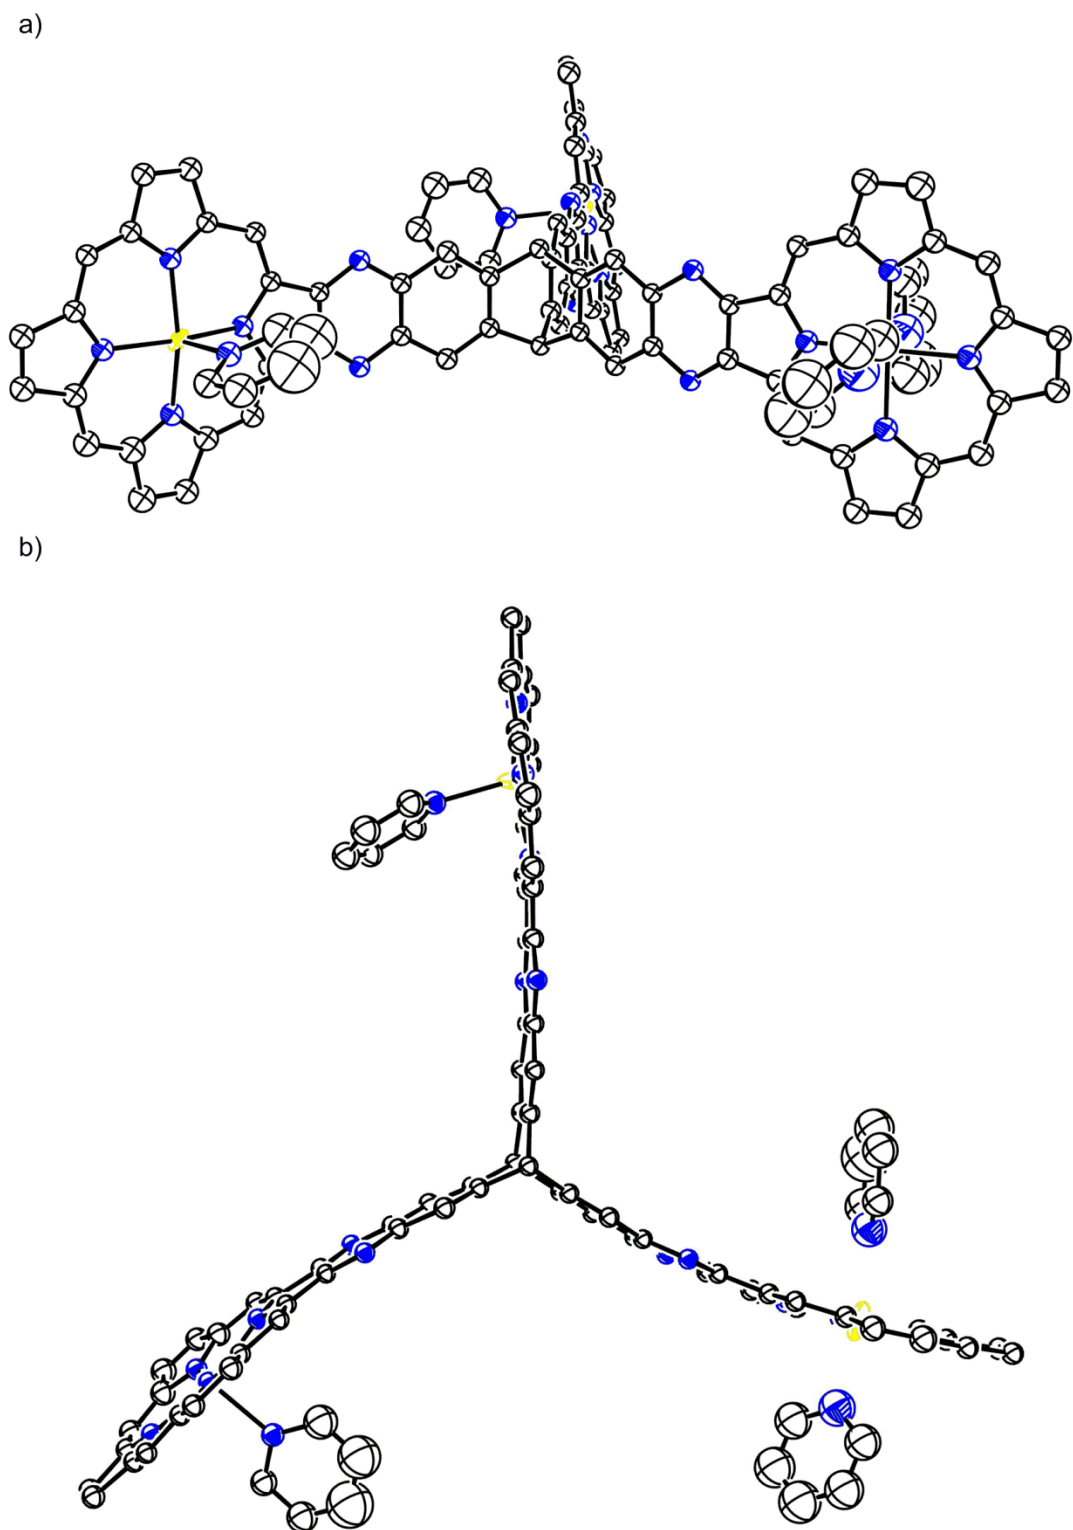

**Figure S55.** X-ray crystal structure of **12Zn**. (a) Top view, (b) side view. The thermal ellipsoids are 30% probability level. Hydrogen atoms, 3,5-di-*tert*-butylphenyl groups and solvent molecules are omitted for clarity.

**Table S9.** Crystal data and structure refinement for **12Zn**

|                                   |                                                                   |                 |
|-----------------------------------|-------------------------------------------------------------------|-----------------|
| Identification code               | exp_424_sq                                                        |                 |
| Empirical formula                 | C <sub>263</sub> H <sub>293</sub> N <sub>21</sub> Zn <sub>3</sub> |                 |
| Formula weight                    | 3944.28                                                           |                 |
| Temperature                       | 100.01(10) K                                                      |                 |
| Wavelength                        | 1.54184 Å                                                         |                 |
| Crystal system                    | Triclinic                                                         |                 |
| Space group                       | P-1                                                               |                 |
| Unit cell dimensions              | a = 23.4051(8) Å                                                  | α = 98.679(2)°. |
|                                   | b = 25.6957(5) Å                                                  | β = 90.766(2)°. |
|                                   | c = 26.3918(7) Å                                                  | γ = 91.045(2)°. |
| Volume                            | 15685.9(7) Å <sup>3</sup>                                         |                 |
| Z                                 | 2                                                                 |                 |
| Density (calculated)              | 0.835 Mg/m <sup>3</sup>                                           |                 |
| Absorption coefficient            | 0.591 mm <sup>-1</sup>                                            |                 |
| F(000)                            | 4216                                                              |                 |
| Crystal size                      | 0.3 x 0.2 x 0.02 mm <sup>3</sup>                                  |                 |
| Theta range for data collection   | 3.907 to 66.600°.                                                 |                 |
| Index ranges                      | -27<=h<=27, -30<=k<=30, -31<=l<=31                                |                 |
| Reflections collected             | 219999                                                            |                 |
| Independent reflections           | 55376 [R(int) = 0.1043]                                           |                 |
| Completeness to theta = 66.600°   | 99.9 %                                                            |                 |
| Absorption correction             | Semi-empirical from equivalents                                   |                 |
| Max. and min. transmission        | 1.00000 and 0.56448                                               |                 |
| Refinement method                 | Full-matrix least-squares on F <sup>2</sup>                       |                 |
| Data / restraints / parameters    | 55376 / 2046 / 3084                                               |                 |
| Goodness-of-fit on F <sup>2</sup> | 1.184                                                             |                 |
| Final R indices [I>2sigma(I)]     | R1 = 0.1253, wR2 = 0.3490                                         |                 |
| R indices (all data)              | R1 = 0.1888, wR2 = 0.3994                                         |                 |
| Extinction coefficient            | n/a                                                               |                 |
| Largest diff. peak and hole       | 1.435 and -0.624 e.Å <sup>-3</sup>                                |                 |

## Density Functional Theory (DFT) calculations

DFT calculations were carried out at the B3LYP/6-31G(d)(C,H,N) level using the Gaussian 09 package.

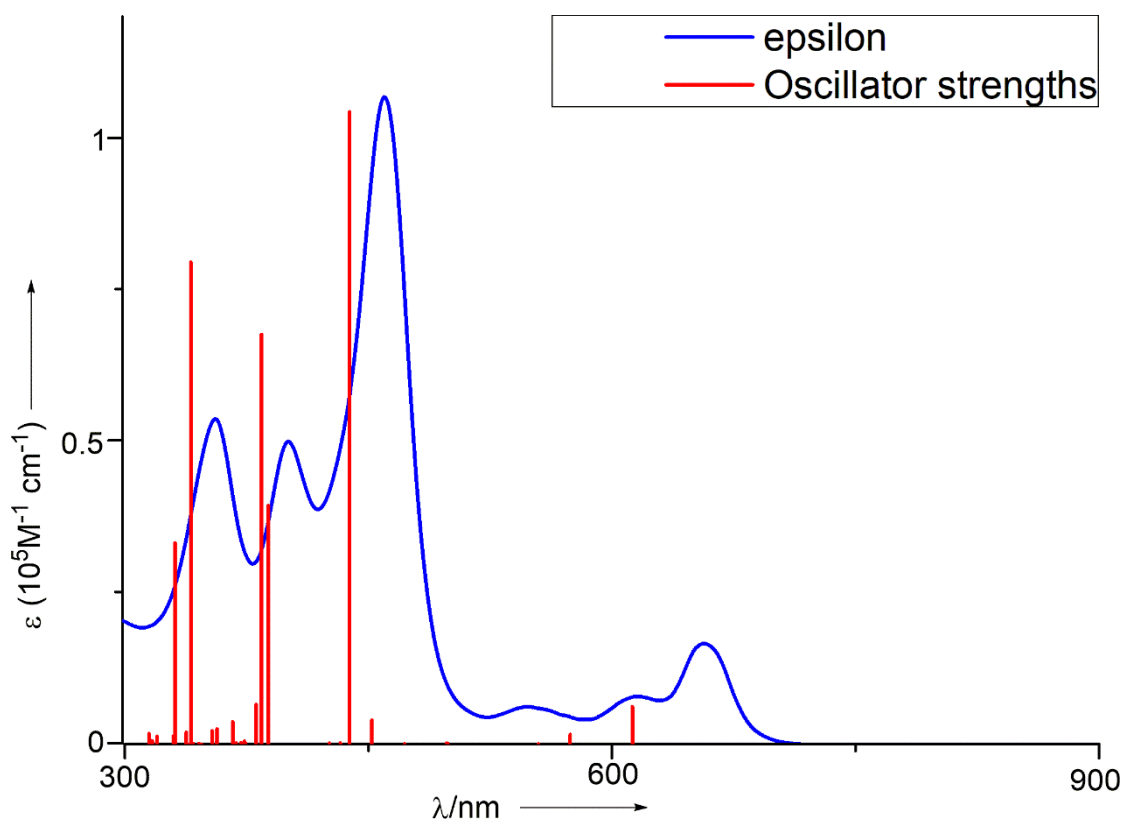

| Wavelength (nm) | Oscillator Strengths | Major Transitions                                                                                 |
|-----------------|----------------------|---------------------------------------------------------------------------------------------------|
| 613             | 0.062                | HOMO-1 $\rightarrow$ LUMO+1 (11%); HOMO $\rightarrow$ LUMO (88%)                                  |
| 574             | 0.0158               | HOMO-1 $\rightarrow$ LUMO (63%); HOMO $\rightarrow$ LUMO+1 (27%)                                  |
| 438             | 1.0430               | HOMO-1 $\rightarrow$ LUMO (24%); HOMO $\rightarrow$ LUMO+3 (19%); HOMO $\rightarrow$ LUMO+1 (55%) |
| 388             | 0.3933               | HOMO-1 $\rightarrow$ LUMO+3 (69%)                                                                 |
| 384             | 0.6759               | HOMO-1 $\rightarrow$ LUMO+1 (48%); HOMO $\rightarrow$ LUMO+3 (34%)                                |
| 341             | 0.7953               | HOMO-4 $\rightarrow$ LUMO+2 (91%)                                                                 |
| 331             | 0.3316               | HOMO-18 $\rightarrow$ LUMO (65%); HOMO-14 $\rightarrow$ LUMO (18%)                                |

**Figure S56.** Calculated vertical transitions and major transitions of **5Ni** calculated by TD-DFT using B3LYP employing the 6-31G(d) basis set.

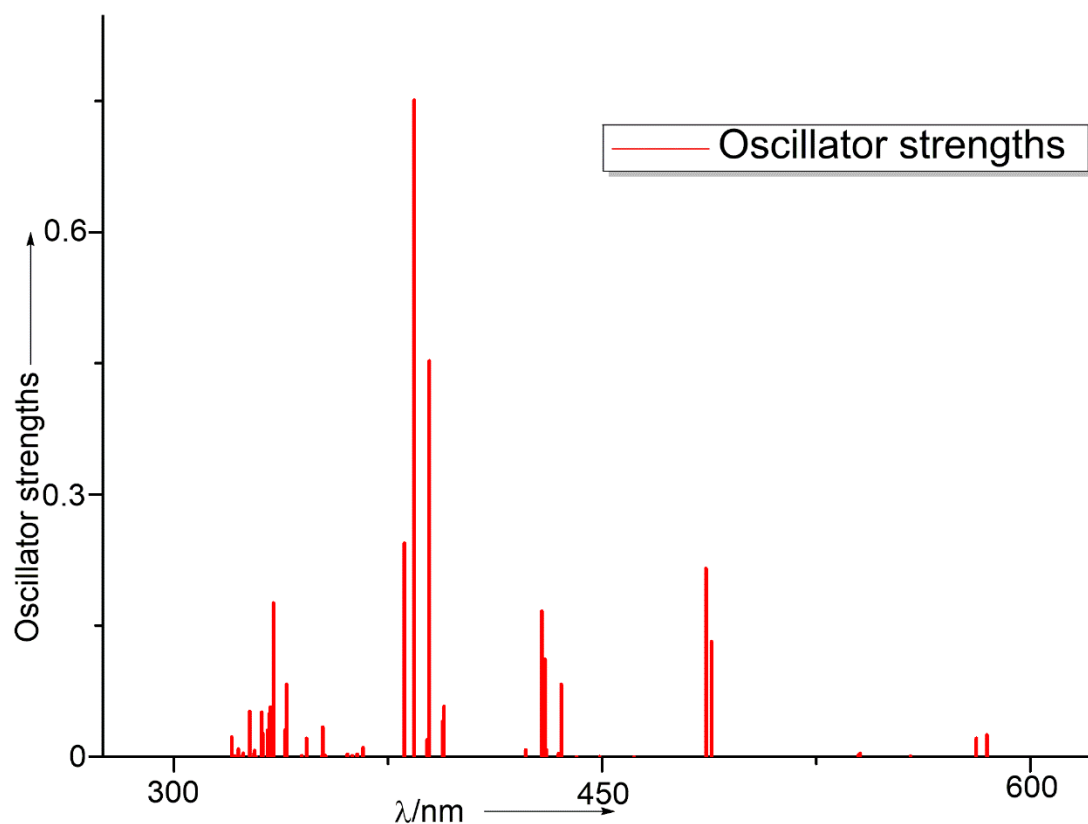

| Wavelength (nm) | Oscillator Strengths | Major Transitions                                              |
|-----------------|----------------------|----------------------------------------------------------------|
| 585             | 0.0251               | HOMO-1→LUMO+1 (25%); HOMO→LUMO (74%)                           |
| 581             | 0.0212               | HOMO-1→LUMO (32%); HOMO→LUMO+1 (66%)                           |
| 488             | 0.1317               | HOMO-1→LUMO+1 (45%); HOMO→LUMO (14%);<br>HOMO→LUMO+2 (37%)     |
| 486             | 0.2152               | HOMO-1→LUMO (45%); HOMO→LUMO+1 (19%);<br>HOMO→LUMO+3 (29%)     |
| 430             | 0.1117               | HOMO-2→LUMO+1 (37%); HOMO→LUMO+3 (15%)                         |
| 429             | 0.1665               | HOMO-2→LUMO+1 (12%); HOMO-1→LUMO+3 (28%);<br>HOMO→LUMO+2 (24%) |
| 389             | 0.4526               | HOMO-1→LUMO+1 (10%); HOMO-1→LUMO+3 (44%);<br>HOMO→LUMO+2 (15%) |
| 384             | 0.7509               | HOMO-1→LUMO (10%); HOMO→LUMO+2 (37%);<br>HOMO→LUMO+3 (15%)     |



**Figure S57.** Calculated vertical transitions and major transitions of **5Ni<sup>+</sup>** calculated by TD-DFT using B3LYP employing the 6-31G(d) basis set.

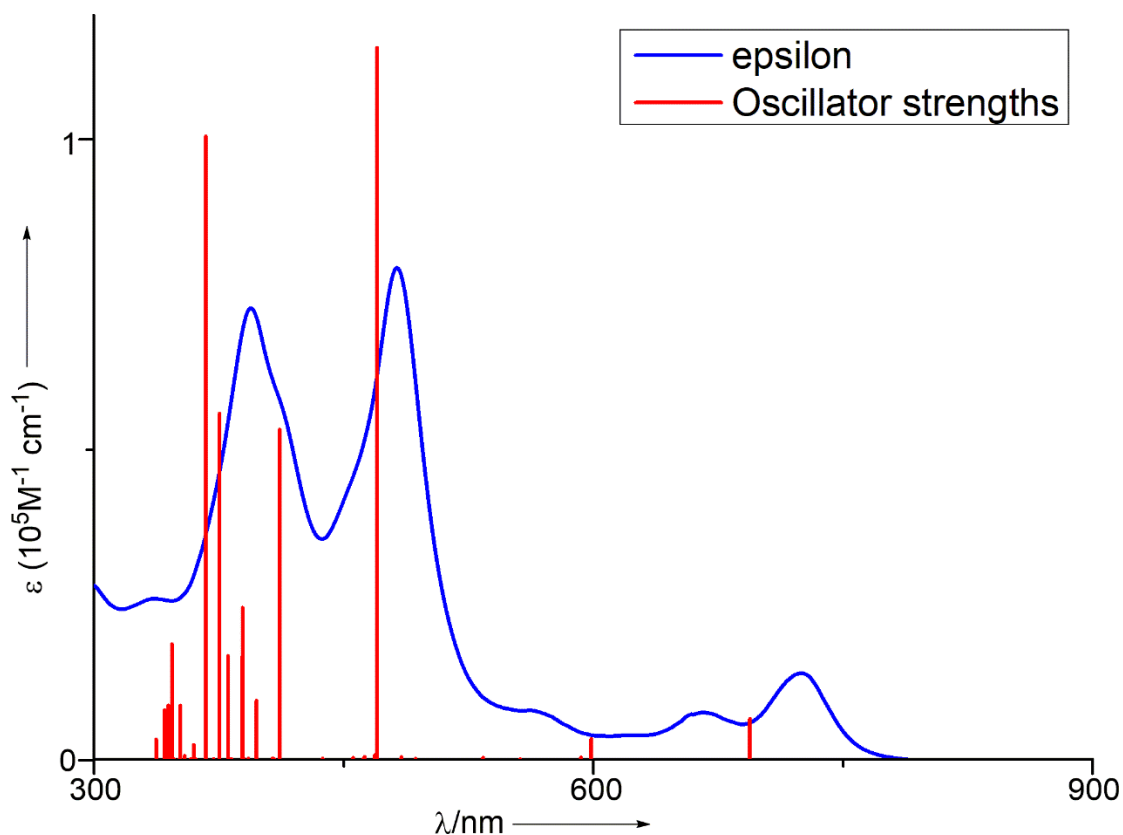

| Wavelength (nm) | Oscillator Strengths | Major Transitions                                                                |
|-----------------|----------------------|----------------------------------------------------------------------------------|
| 694             | 0.0651               | HOMO→LUMO (95%)                                                                  |
| 599             | 0.0327               | HOMO-1→LUMO (73%); HOMO→LUMO+2 (23%)                                             |
| 470             | 1.1454               | HOMO-1→LUMO (19%); HOMO-1→LUMO+3 (20%); HOMO→LUMO+2 (59%)                        |
| 412             | 0.5303               | HOMO-3→LUMO+2 (10%); HOMO-1→LUMO+3 (68%); HOMO→LUMO+2 (12%)                      |
| 389             | 0.2420               | HOMO-7→LUMO (15%); HOMO-5→LUMO+1 (20%); HOMO-4→LUMO+1 (19%); HOMO-1→LUMO+2 (22%) |
| 389             | 0.1648               | HOMO-7→LUMO (13%); HOMO-5→LUMO+1 (29%); HOMO-1→LUMO+2 (24%)                      |
| 381             | 0.1663               | HOMO-10→LUMO (89%)                                                               |
| 376             | 0.5565               | HOMO-11→LUMO (51%); HOMO-6→LUMO+1 (15%); HOMO-3→LUMO+2 (20%)                     |
| 367             | 1.0025               | HOMO-11→LUMO (21%); HOMO-6→LUMO+1 (53%)                                          |

347

0.1853

HOMO-18→LUMO (22%); HOMO-3→LUMO+3 (59%)

**Figure S58.** Calculated vertical transitions and major transitions of **6Ni** calculated by TD-DFT using B3LYP employing the 6-31G(d) basis set.

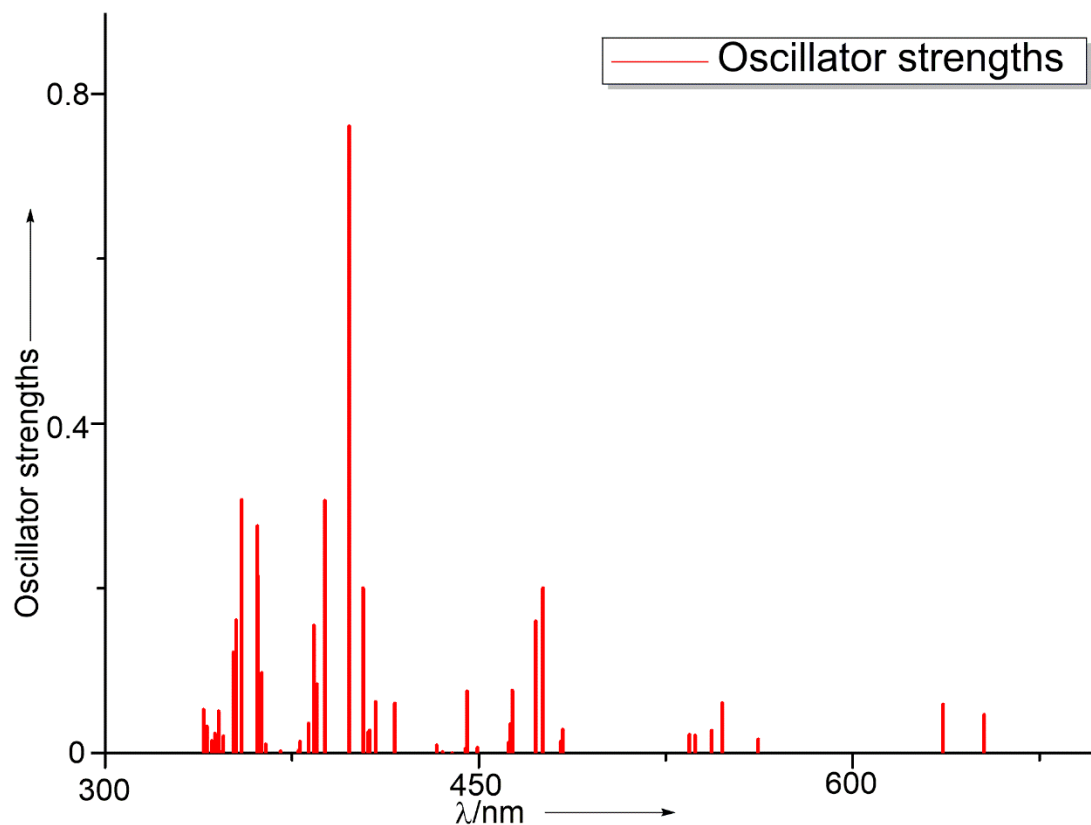

| Wavelength (nm) | Oscillator Strengths | Major Transitions                                                                |
|-----------------|----------------------|----------------------------------------------------------------------------------|
| 653             | 0.0467               | HOMO→LUMO (91%)                                                                  |
| 636             | 0.0593               | HOMO-1→LUMO(11%); HOMO→LUMO+1 (87%)                                              |
| 476             | 0.2004               | HOMO-2→LUMO (21%); HOMO-1→LUMO (11%); HOMO-1→LUMO+3 (15%); HOMO→LUMO+2 (38%)     |
| 473             | 0.1603               | HOMO-2→LUMO+1 (30%); HOMO-1→LUMO+1 (11%); HOMO-1→LUMO+2 (17%); HOMO→LUMO+3 (33%) |
| 404             | 0.2003               | HOMO-1→LUMO+2 (22%); HOMO→LUMO+4 (52%)                                           |
| 398             | 0.7608               | HOMO-3→LUMO+2 (10%); HOMO-1→LUMO+3 (47%); HOMO→LUMO+2 (14%)                      |
| 388             | 0.3064               | HOMO-6→LUMO+1 (28%); HOMO-5→LUMO (14%); HOMO-2→LUMO+2 (25%); HOMO-1→LUMO+2 (10%) |
| 384             | 0.1550               | HOMO-2→LUMO+3 (88%)                                                              |

|     |        |                                                                |
|-----|--------|----------------------------------------------------------------|
| 361 | 0.2161 | HOMO-3→LUMO+2 (33%); HOMO-3→LUMO+3 (11%)                       |
| 361 | 0.2756 | HOMO-4→LUMO+3 (16%); HOMO-3→LUMO+2 (16%); HOMO-3→LUMO+3 (22%)  |
| 355 | 0.3074 | HOMO-11→LUMO+1 (13%); HOMO-6→LUMO+3 (38%); HOMO-5→LUMO+2 (26%) |
| 353 | 0.1615 | HOMO-6→LUMO+2 (23%); HOMO-5→LUMO+2 (47%)                       |
| 351 | 0.1223 | HOMO-6→LUMO+3 (36%); HOMO-5→LUMO+2 (29%); HOMO-3→LUMO+2 (13%)  |

**Figure S59.** Calculated vertical transitions and major transitions of **6Ni** calculated by TD-DFT using B3LYP employing the 6-31G(d) basis set.

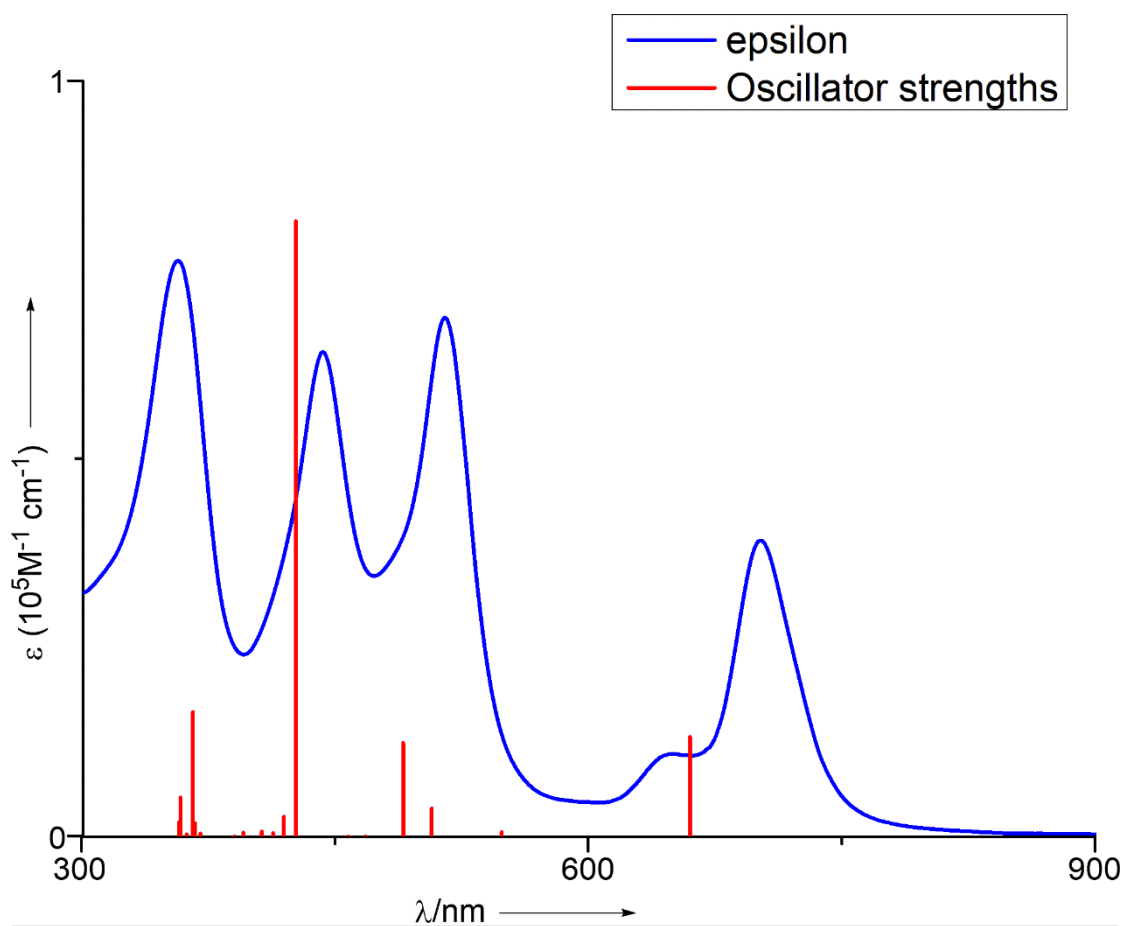

| Wavelength (nm) | Oscillator Strengths | Major Transitions                      |
|-----------------|----------------------|----------------------------------------|
| 660             | 0.1321               | HOMO-1→LUMO+1 (12%); HOMO→LUMO (87%)   |
| 660             | 0.1321               | HOMO-1→LUMO (12%); HOMO→LUMO+1 (87%)   |
| 490             | 0.1243               | HOMO-1→LUMO+1 (37%); HOMO→LUMO+4 (31%) |

|     |        |                                          |
|-----|--------|------------------------------------------|
| 490 | 0.1243 | HOMO→LUMO (37%); HOMO→LUMO+5 (31%)       |
| 427 | 0.8146 | HOMO-1→LUMO+1 (25%); HOMO→LUMO+4 (55%)   |
| 427 | 0.8146 | HOMO-1→LUMO (25%); HOMO→LUMO+5 (55%)     |
| 366 | 0.1650 | HOMO-8→LUMO (10%); HOMO-1→LUMO+5 (56%)   |
| 366 | 0.1650 | HOMO-8→LUMO+1 (10%); HOMO-1→LUMO+4 (56%) |

**Figure S60.** Calculated vertical transitions and major transitions of **7Ni** calculated by TD-DFT using B3LYP employing the 6-31G(d) basis set.

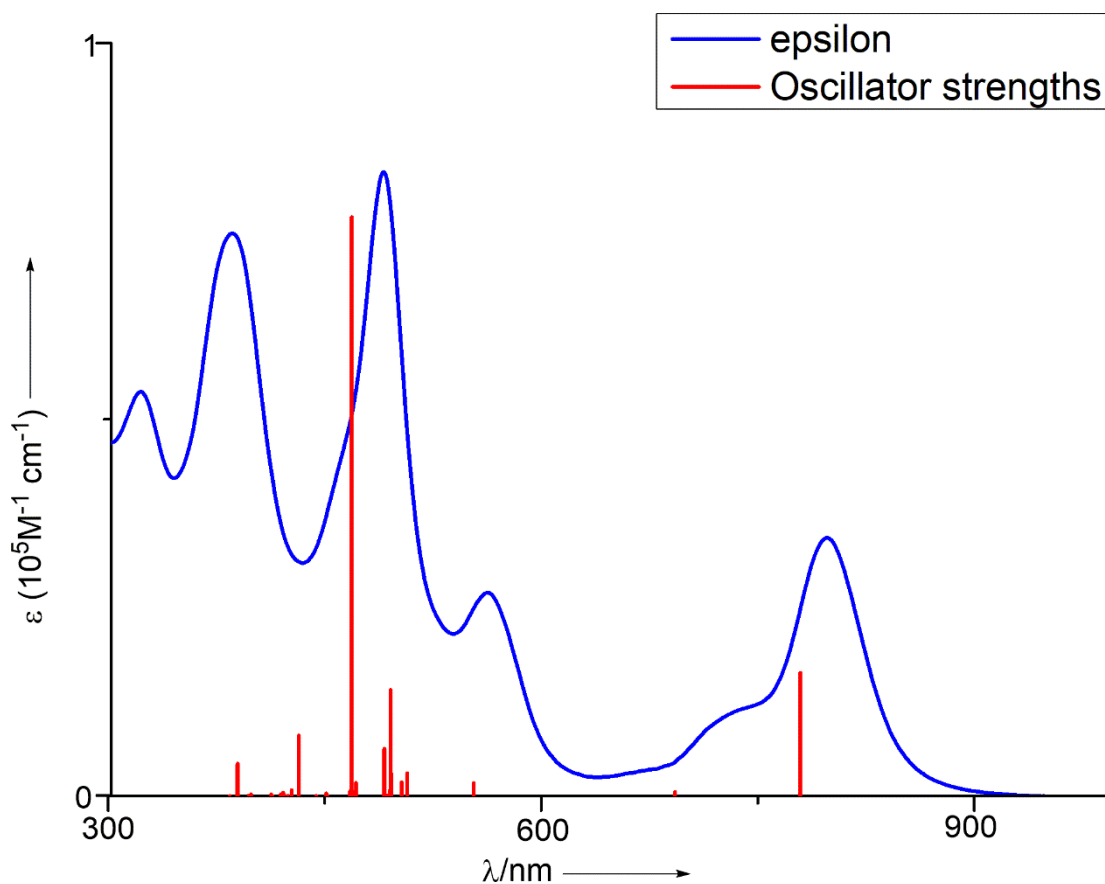

| Wavelength (nm) | Oscillator Strengths | Major Transitions                                           |
|-----------------|----------------------|-------------------------------------------------------------|
| 780             | 0.1640               | HOMO→LUMO (94%)                                             |
| 779             | 0.1640               | HOMO→LUMO+1 (94%)                                           |
| 496             | 0.1411               | HOMO-5→LUMO (24%); HOMO-4→LUMO+1 (16%); HOMO-1→LUMO (11%)   |
| 496             | 0.1395               | HOMO-5→LUMO+1 (24%); HOMO-4→LUMO (17%); HOMO-1→LUMO+1 (11%) |

|     |        |                                                                                   |
|-----|--------|-----------------------------------------------------------------------------------|
| 469 | 0.7693 | HOMO-5→LUMO (28%); HOMO-1→LUMO (21%); HOMO→LUMO+4 (12%)<br>HOMO→LUMO+5 (12%)      |
| 469 | 0.7531 | HOMO-5→LUMO+1 (27%); HOMO-1→LUMO+1 (20%); HOMO→LUMO+4 (13%);<br>HOMO→LUMO+5 (12%) |

**Figure S61.** Calculated vertical transitions and major transitions of **8Ni** calculated by TD-DFT using B3LYP employing the 6-31G(d) basis set.

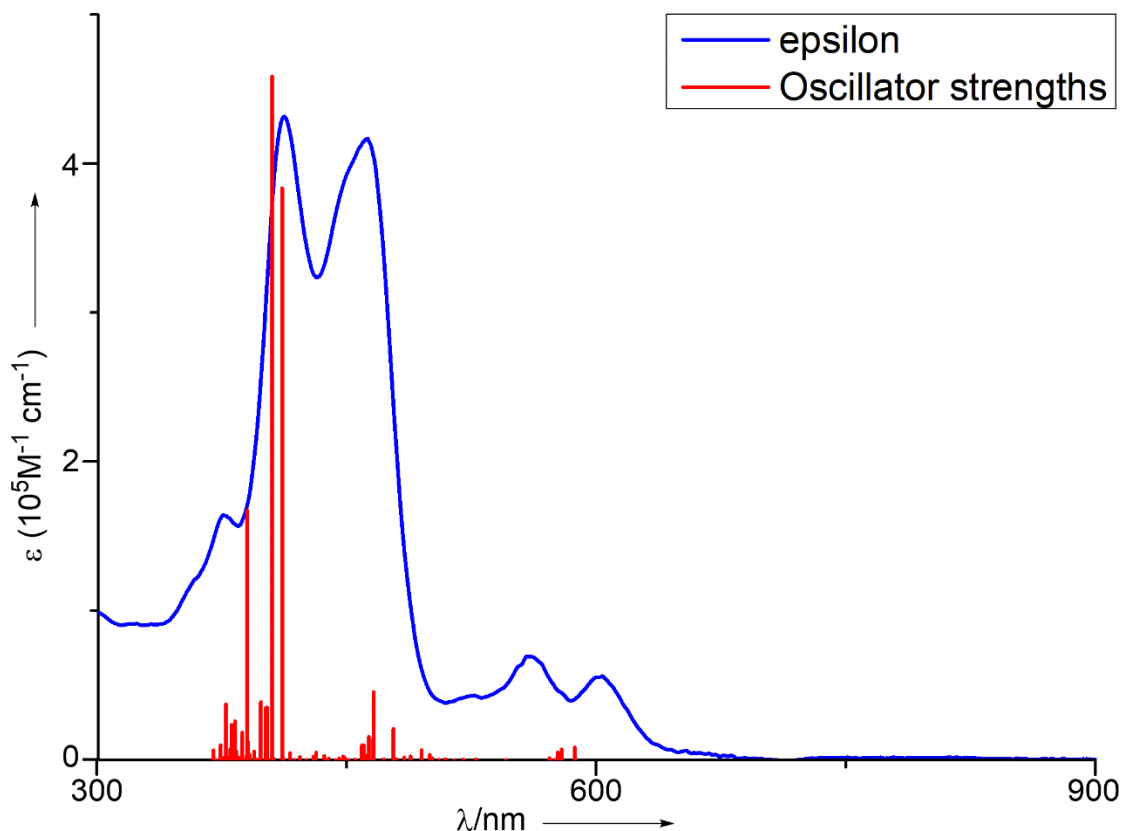

| Wavelength (nm) | Oscillator Strengths | Major Transitions                                                                    |
|-----------------|----------------------|--------------------------------------------------------------------------------------|
| 466             | 0.297                | HOMO-2→LUMO+6 (12%); HOMO-1→LUMO+2 (10%) HOMO-1→LUMO+6 (21%);<br>HOMO-1→LUMO+7 (18%) |
| 411             | 2.4932               | HOMO-3→LUMO+5 (32%); HOMO→LUMO+7 (21%)                                               |
| 405             | 2.9809               | HOMO-5→LUMO+3 (17%); HOMO-4→LUMO+4 (14%); HOMO-2→LUMO+6 (11%)                        |
| 402             | 0.2306               | HOMO→LUMO+10 (63%)                                                                   |
| 401             | 0.2267               | HOMO-10→LUMO+1 (21%); HOMO-10→LUMO+2 (25%)                                           |
| 399             | 0.2539               | HOMO-3→LUMO+7 (38%); HOMO→LUMO+5 (18%)                                               |
| 390             | 1.0887               | HOMO-5→LUMO+6 (27%); HOMO-4→LUMO+7 (10%); HOMO-2→LUMO+3 (15%)                        |

**Figure S62.** Calculated vertical transitions and major transitions of **12Ni** calculated by TD-DFT using B3LYP employing the 6-31G(d) basis set.

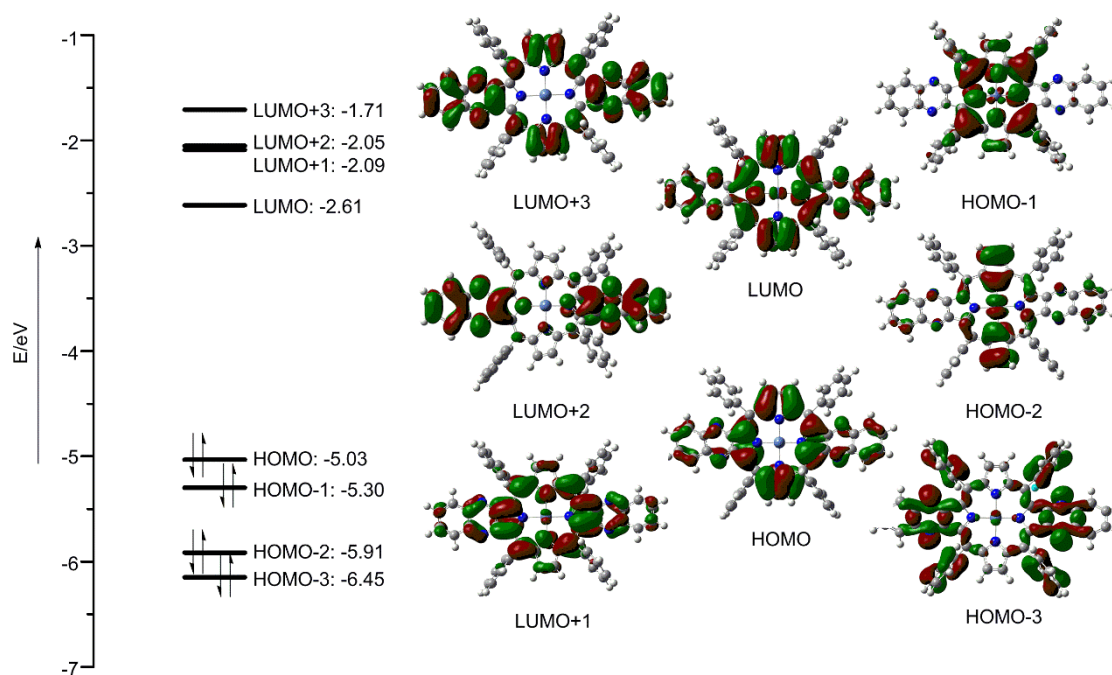

**Figure S63.** Energy diagram and selected Kohn-Sham orbitals of **5Ni**.

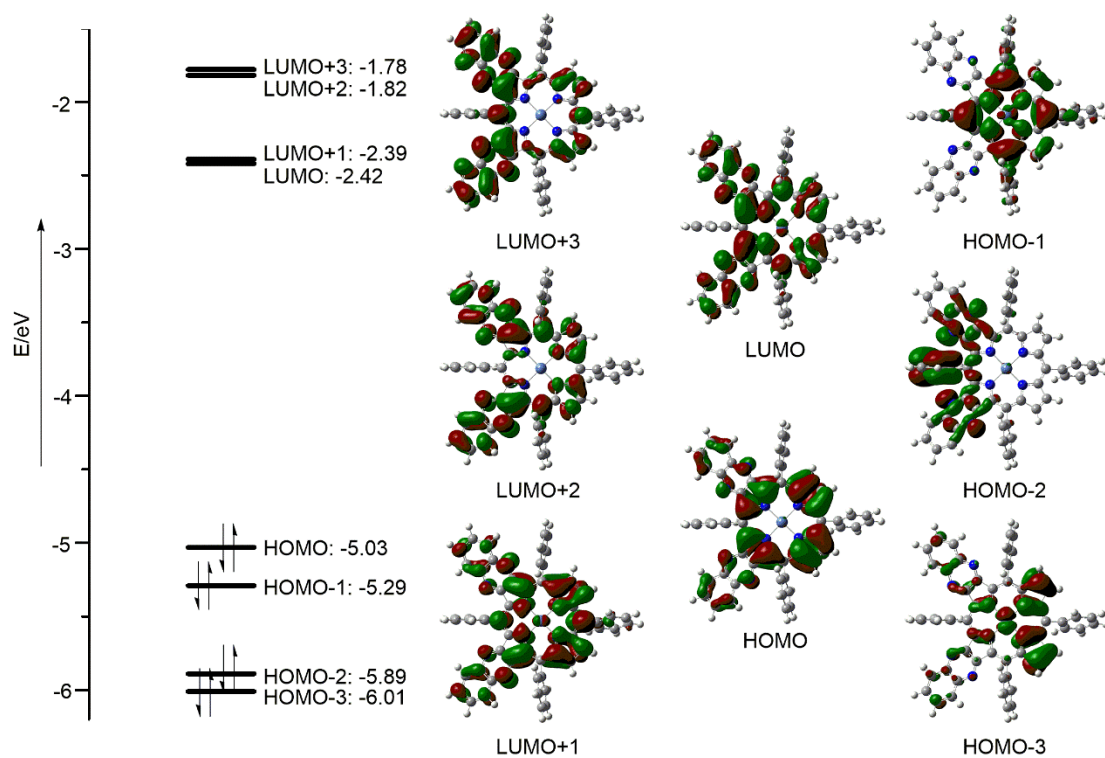

**Figure S64.** Energy diagram and selected Kohn–Sham orbitals of  $5\text{Ni}'$ .

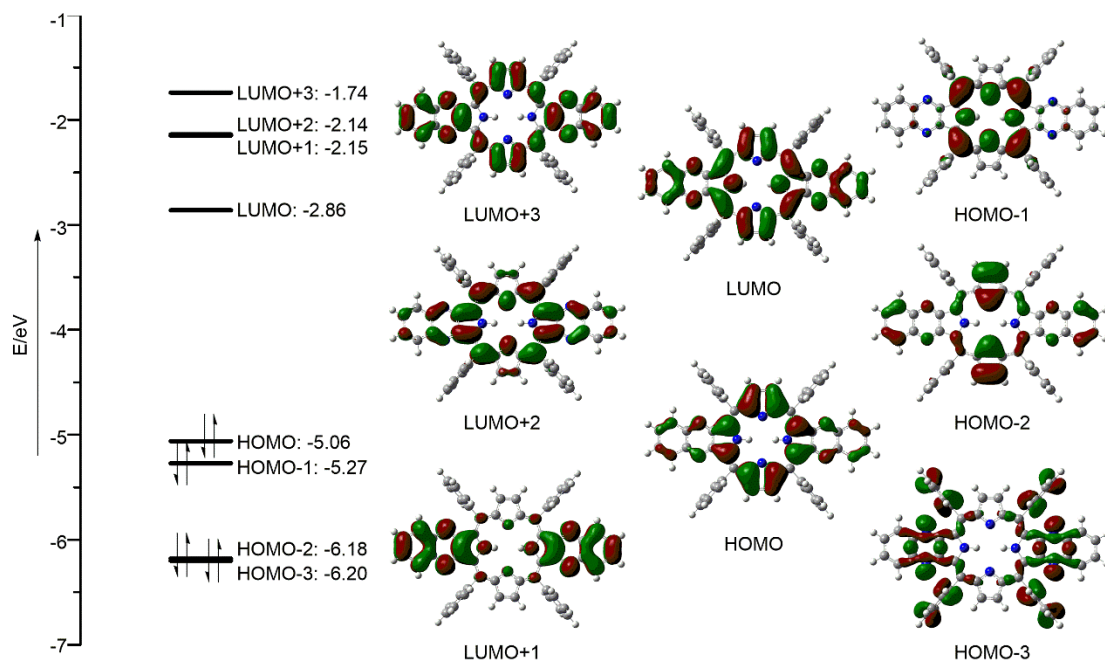

**Figure S65.** Energy diagram and selected Kohn–Sham orbitals of  $5\text{H}$ .

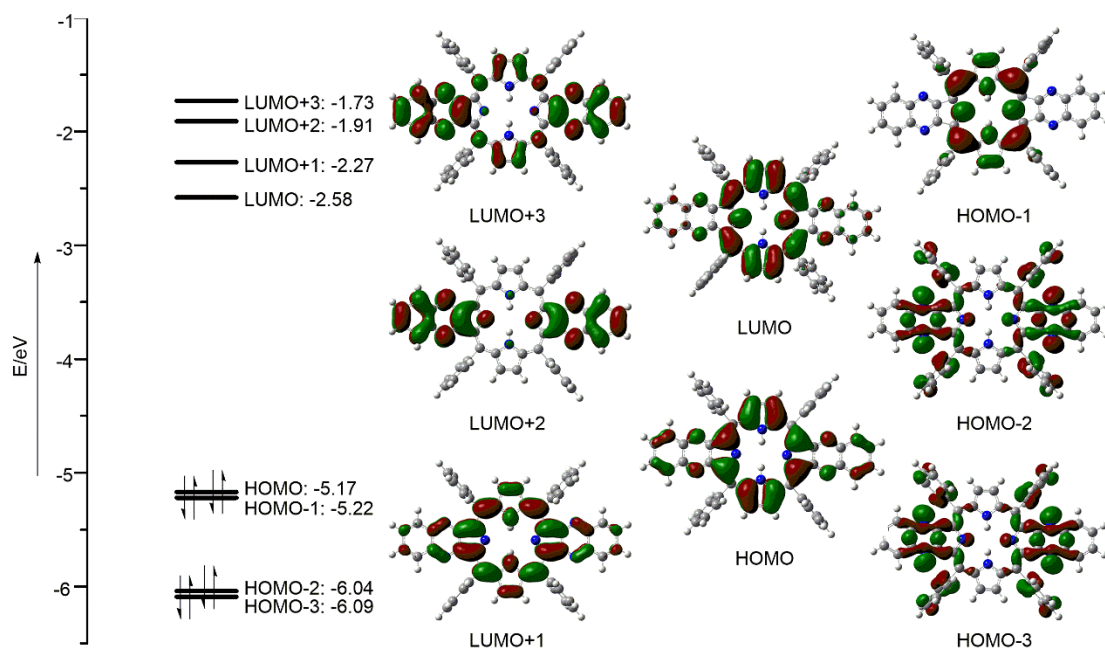

**Figure S66.** Energy diagram and selected Kohn–Sham orbitals of **5H'**.

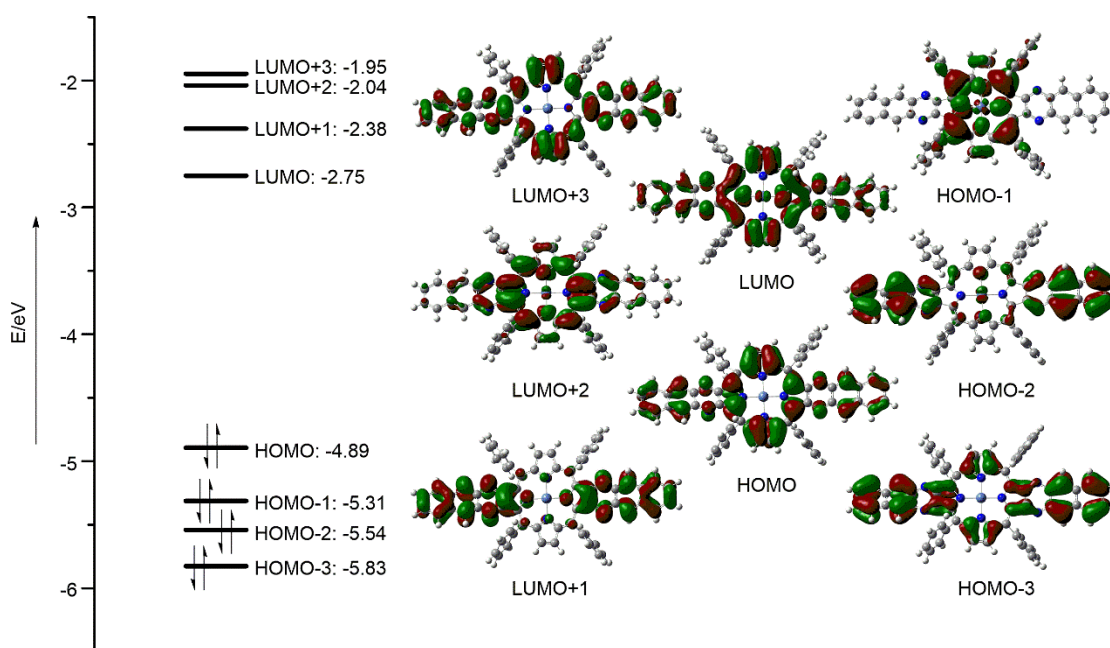

**Figure S67.** Energy diagram and selected Kohn–Sham orbitals of **6Ni**.



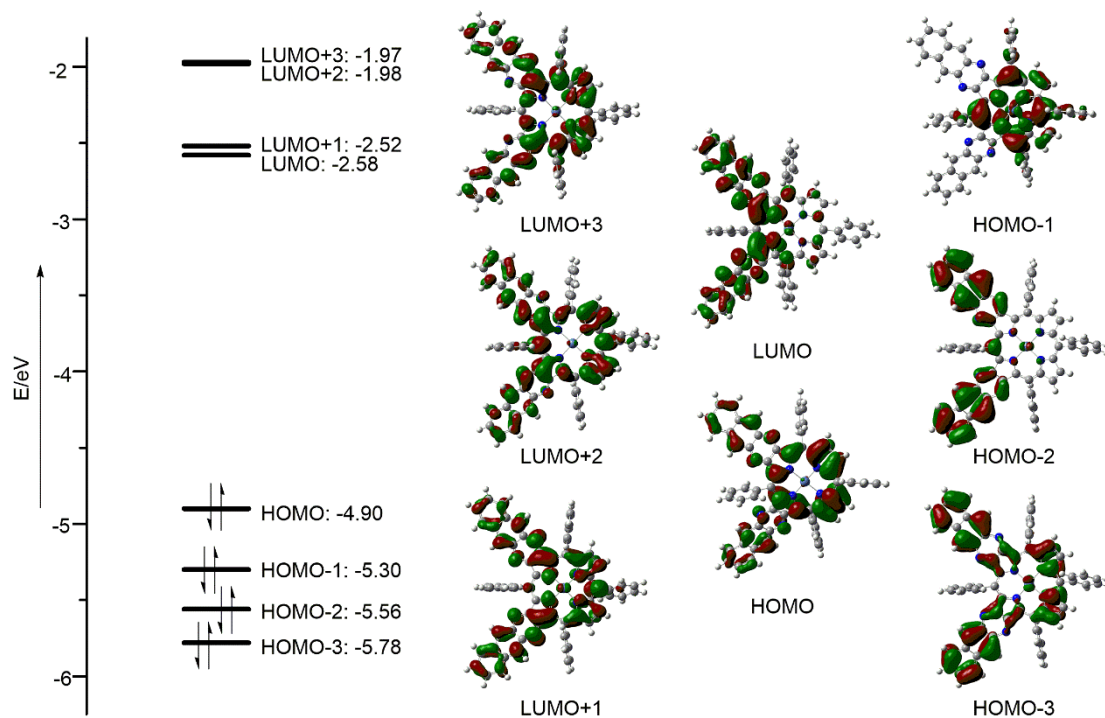

**Figure S68.** Energy diagram and selected Kohn–Sham orbitals of  $6\text{Ni}$ .

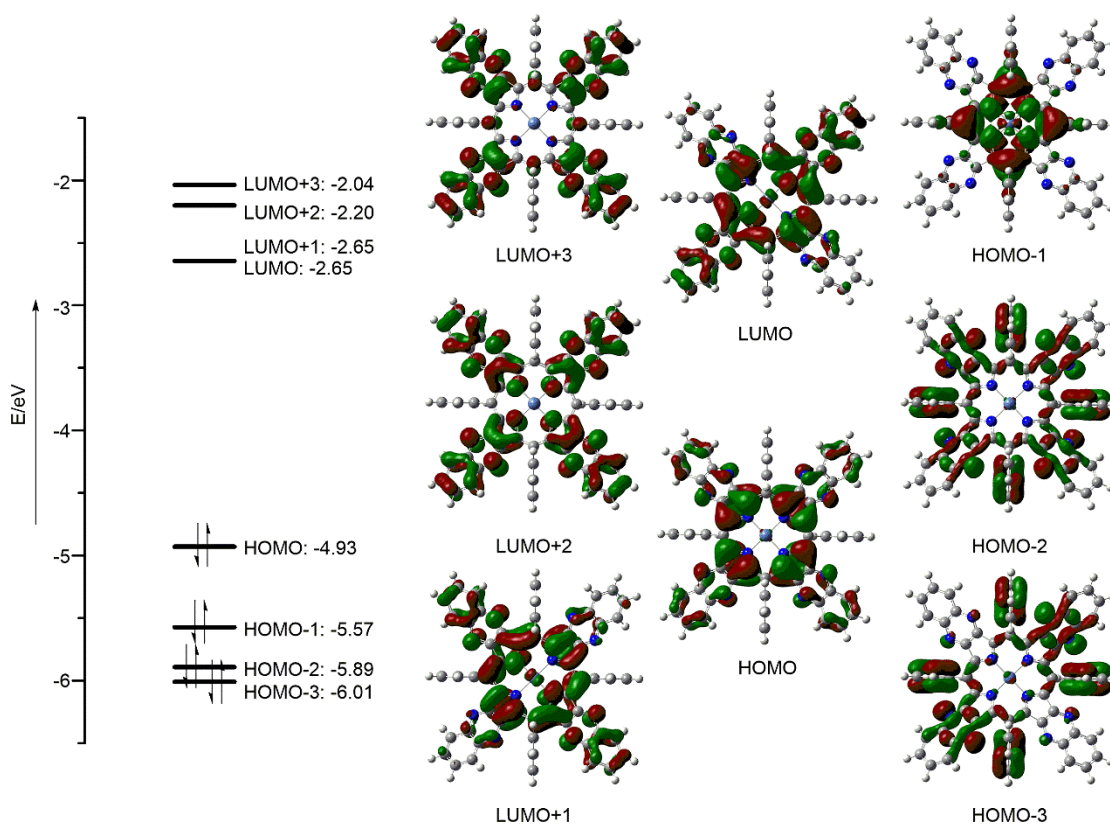

**Figure S69.** Energy diagram and selected Kohn–Sham orbitals of  $7\text{Ni}$ .

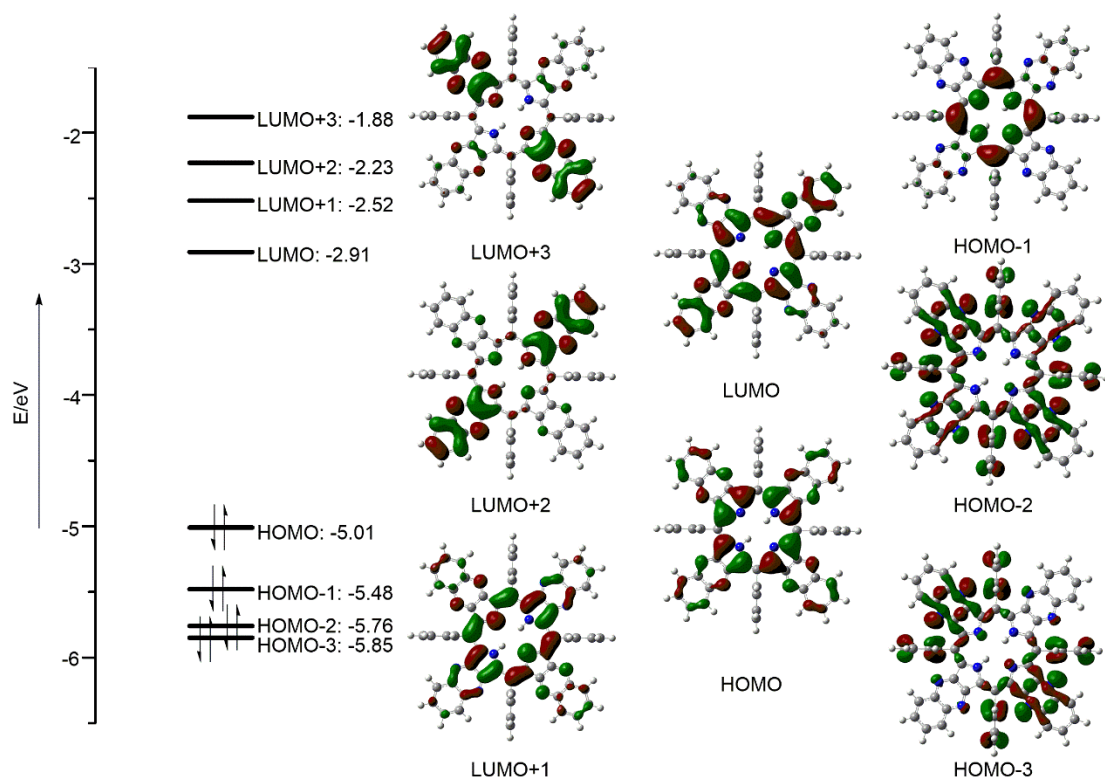

**Figure S70.** Energy diagram and selected Kohn-Sham orbitals of 7H.

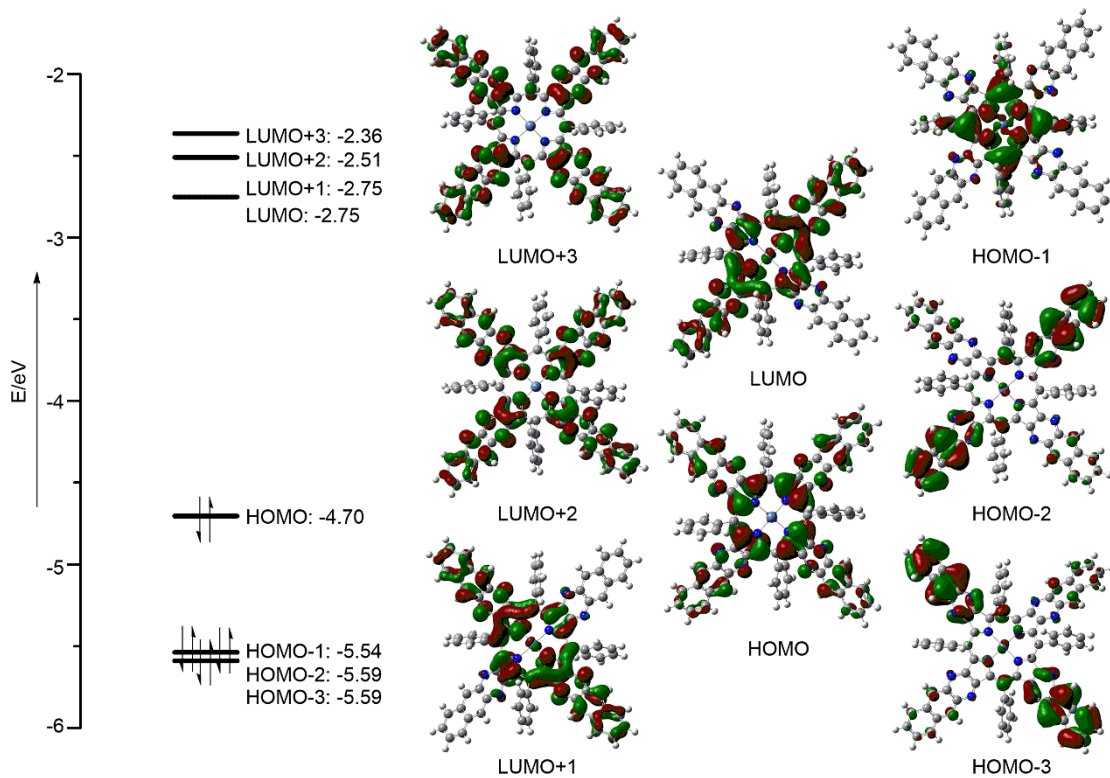

**Figure S71.** Energy diagram and selected Kohn-Sham orbitals of 8Ni.

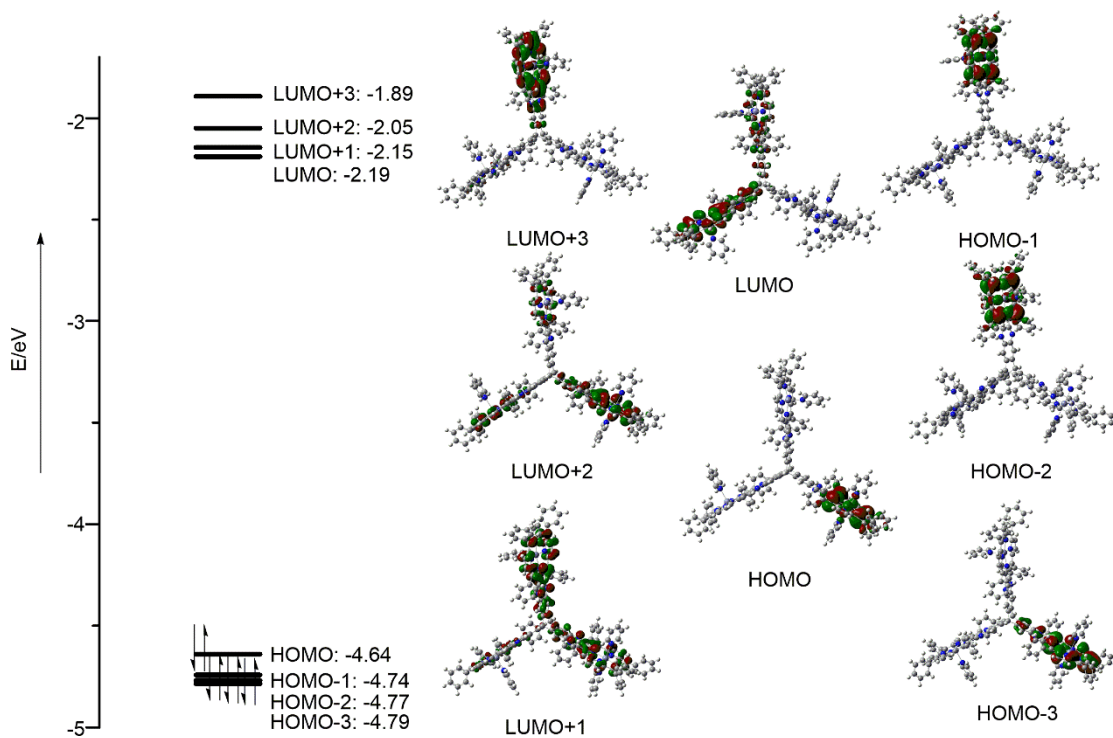

Figure S72. Energy diagram and selected Kohn-Sham orbitals of 12Ni.

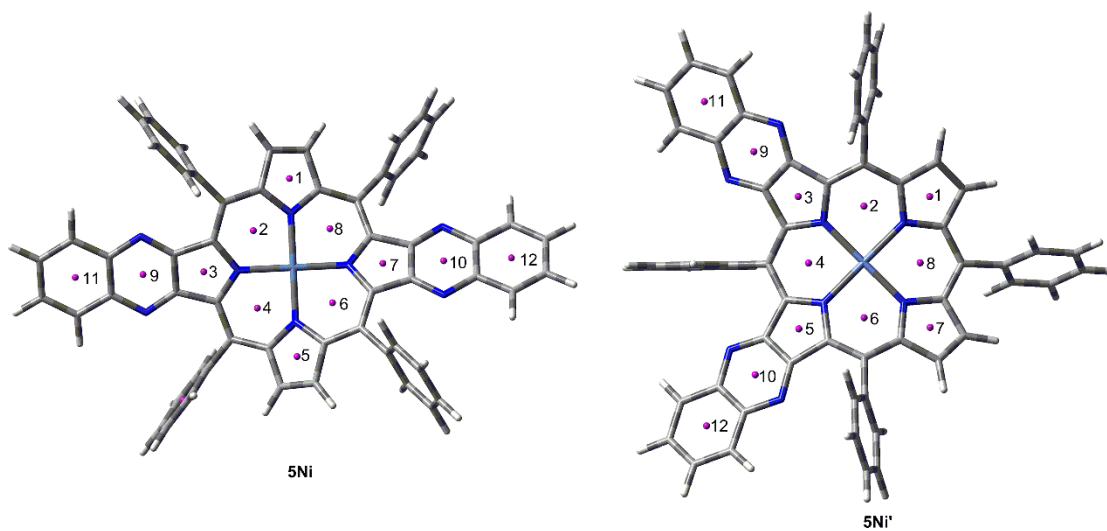

| Ring of 5Ni | NICS(0) value / ppm | Ring of 5Ni' | NICS(0) value / ppm |
|-------------|---------------------|--------------|---------------------|
| 1           | -6.9102             | 1            | -7.2244             |
| 2           | -16.3188            | 2            | -15.8892            |
| 3           | -0.4045             | 3            | 0.1196              |
| 4           | -16.5558            | 4            | -16.0439            |
| 5           | -6.9252             | 5            | 0.0330              |
| 6           | -16.4016            | 6            | -15.8291            |

|    |          |    |          |
|----|----------|----|----------|
| 7  | -0.4178  | 7  | -7.1573  |
| 8  | -16.3562 | 8  | -15.6082 |
| 9  | -8.3340  | 9  | -8.1737  |
| 10 | -8.2973  | 10 | -8.1588  |
| 11 | -9.7713  | 11 | -9.6640  |
| 12 | -9.7977  | 12 | -9.6379  |

Figure S73. Calculated NICS values of 5Ni and 5Ni'.

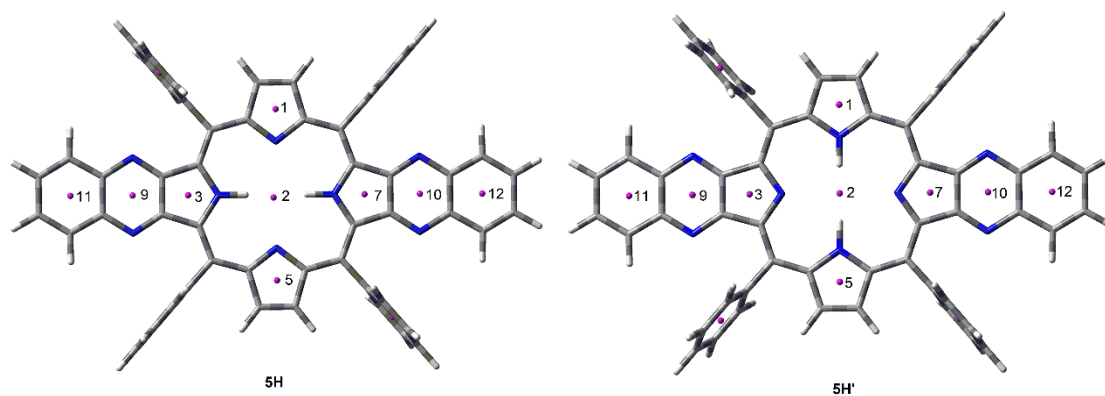

| Ring of 5H | NICS(0) value / ppm | Ring of 5H' | NICS(0) value / ppm |
|------------|---------------------|-------------|---------------------|
| 1          | -2.0594             | 1           | -12.6667            |
| 3          | -4.0872             | 3           | 3.5952              |
| 5          | -2.1632             | 5           | -12.6532            |
| 7          | -4.0607             | 7           | 3.5679              |
| 2          | -13.4603            | 2           | -13.6956            |
| 9          | -9.8103             | 9           | -7.2550             |
| 10         | -9.8043             | 10          | -7.2316             |
| 11         | -9.9806             | 11          | -9.6295             |
| 12         | -9.9913             | 12          | -9.6562             |

Figure S74. Calculated NICS values of 6H and 6H'.

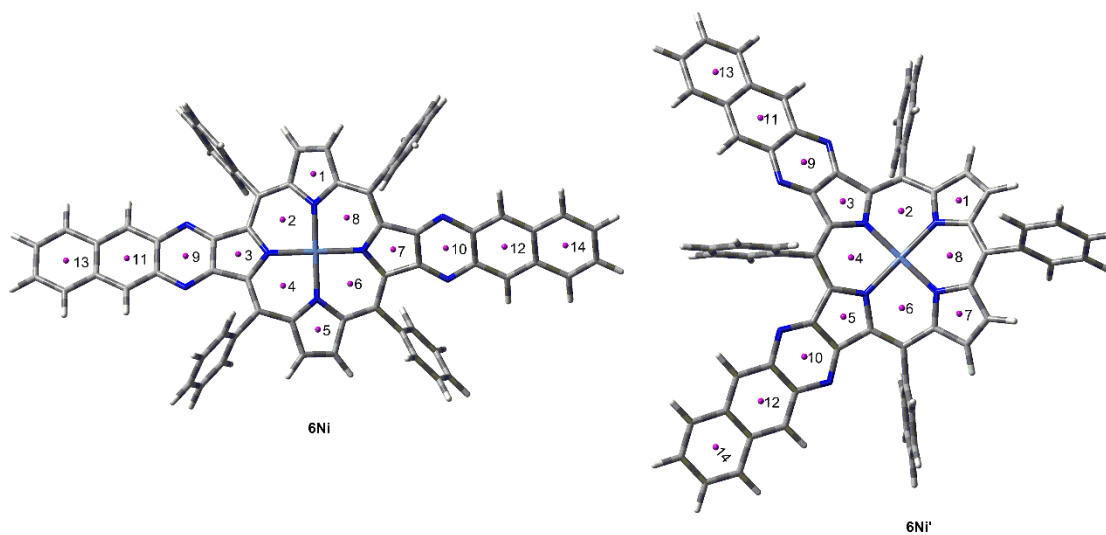

| Ring of 6Ni | NICS(0) value / ppm | Ring of 6Ni' | NICS(0) value / ppm |
|-------------|---------------------|--------------|---------------------|
| 1           | -6.9027             | 1            | -7.2566             |
| 2           | -15.6450            | 2            | -15.1790            |
| 3           | 1.4705              | 3            | 1.9021              |
| 4           | -15.8558            | 4            | -15.5111            |
| 5           | -7.0121             | 5            | 2.0572              |
| 6           | -16.1683            | 6            | -15.0316            |
| 7           | 1.3328              | 7            | -7.2393             |
| 8           | -16.0294            | 8            | -14.8311            |
| 9           | -7.4736             | 9            | -7.1858             |
| 10          | -7.3032             | 10           | -7.1108             |
| 11          | -12.9369            | 11           | -12.7525            |
| 12          | -12.8931            | 12           | -12.7635            |
| 13          | -8.8655             | 13           | -8.7783             |
| 14          | -8.9048             | 14           | -8.8627             |

Figure S75. Calculated NICS values of 6Ni and 6Ni'.

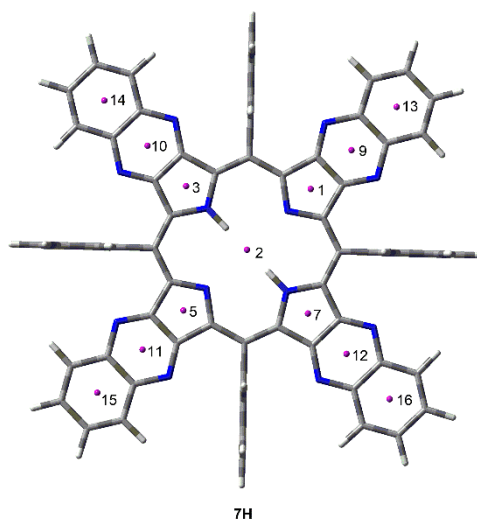

| Ring of 7H | NICS(0) value / ppm | Ring of 7H | NICS(0) value / ppm |
|------------|---------------------|------------|---------------------|
| 1          | 3.5052              | 3          | -4.2199             |
| 5          | 3.5046              | 7          | -4.2198             |
| 2          | -12.5702            | 9          | -7.4142             |
| 10         | -9.9086             | 11         | -7.4140             |
| 12         | -9.9087             | 13         | -9.3731             |
| 14         | -9.7025             | 15         | -9.3729             |
| 16         | -9.7026             |            |                     |

Figure S76. Calculated NICS values of 7H.

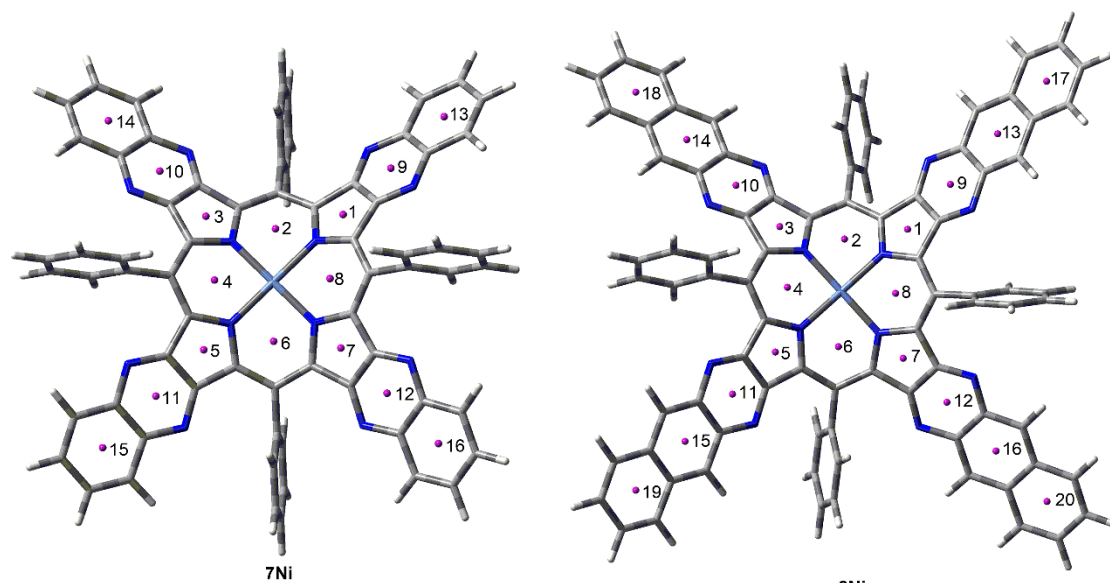

| Ring of 7Ni | NICS(0) value / ppm | Ring of 8Ni | NICS(0) value / ppm |
|-------------|---------------------|-------------|---------------------|
| 1           | -1.2817             | 1           | 0.6198              |
| 2           | -14.8445            | 2           | -13.9754            |
| 3           | -1.2816             | 3           | 0.3538              |
| 4           | -14.8446            | 4           | -13.7352            |
| 5           | -1.2816             | 5           | 0.6615              |
| 6           | -14.8447            | 6           | -13.8249            |
| 7           | -1.2814             | 7           | 0.6164              |
| 8           | -14.8448            | 8           | -14.0064            |
| 9           | -8.3624             | 9           | -7.3937             |
| 10          | -8.3623             | 10          | -7.4238             |
| 11          | -8.3621             | 11          | -7.4299             |
| 12          | -8.3623             | 12          | -7.4691             |
| 13          | -9.5148             | 13          | -12.7307            |
| 14          | -9.5148             | 14          | -12.6954            |
| 15          | -9.5149             | 15          | -12.6935            |
| 16          | -9.5148             | 16          | -12.6942            |
|             |                     | 17          | -8.8472             |
|             |                     | 18          | -8.7337             |
|             |                     | 19          | -8.7621             |
|             |                     | 20          | -8.7091             |

**Figure S77.** Calculated NICS values of 7Ni and 8Ni.

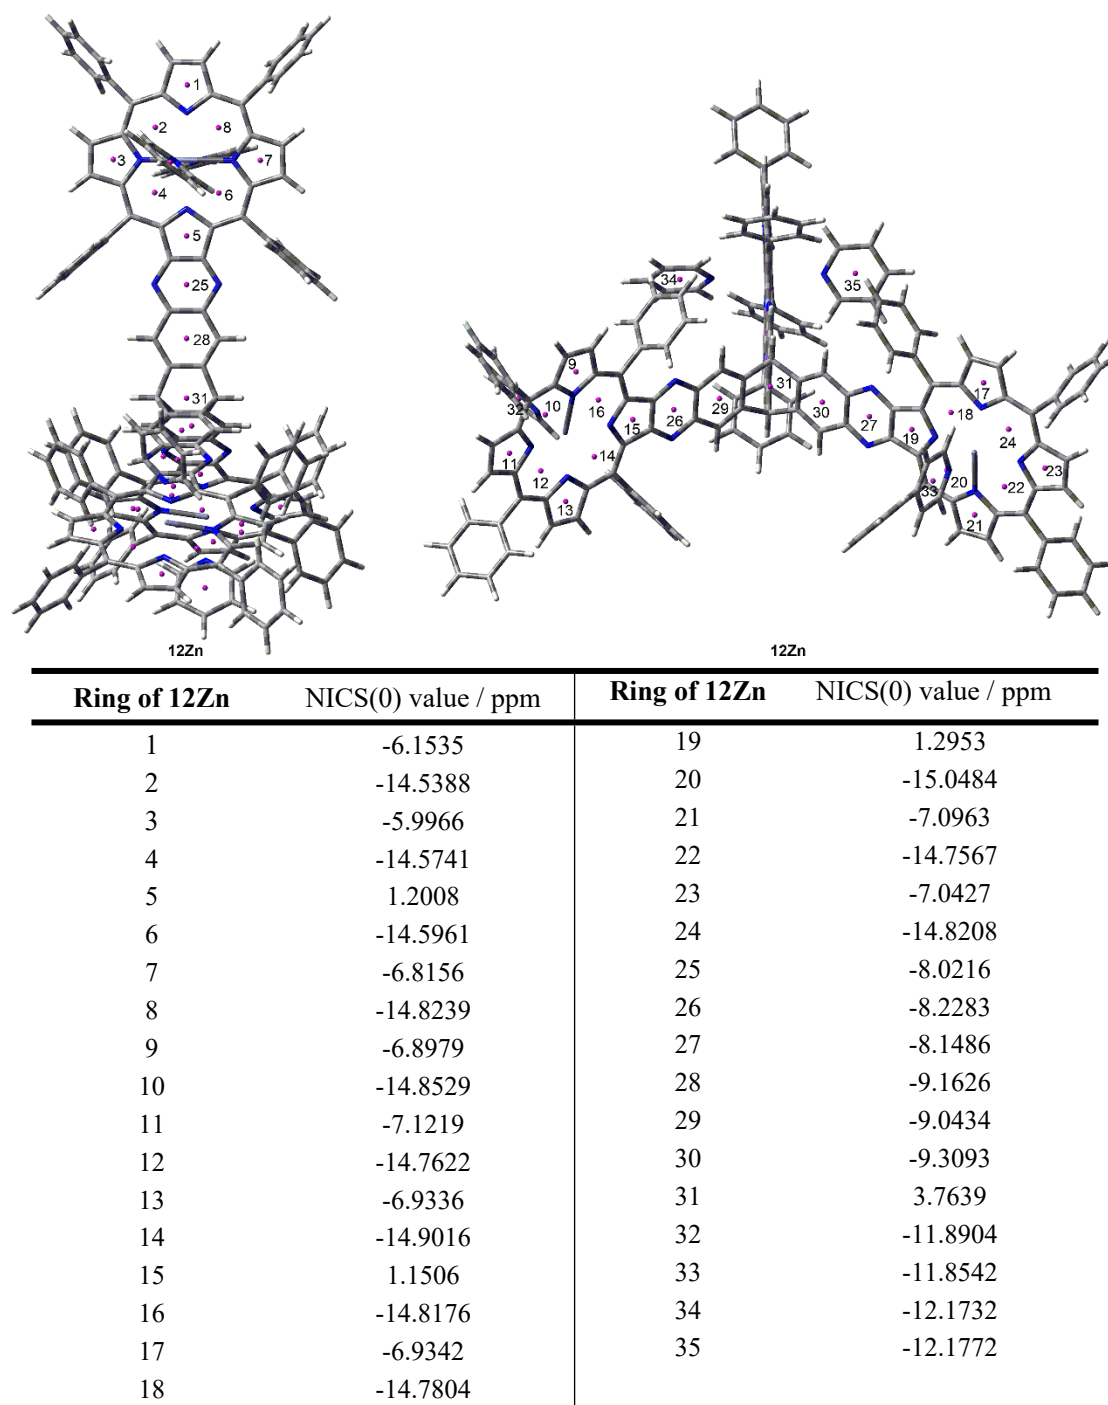

Figure S78. Calculated NICS values of **12Zn**.

### Singlet Oxygen Production

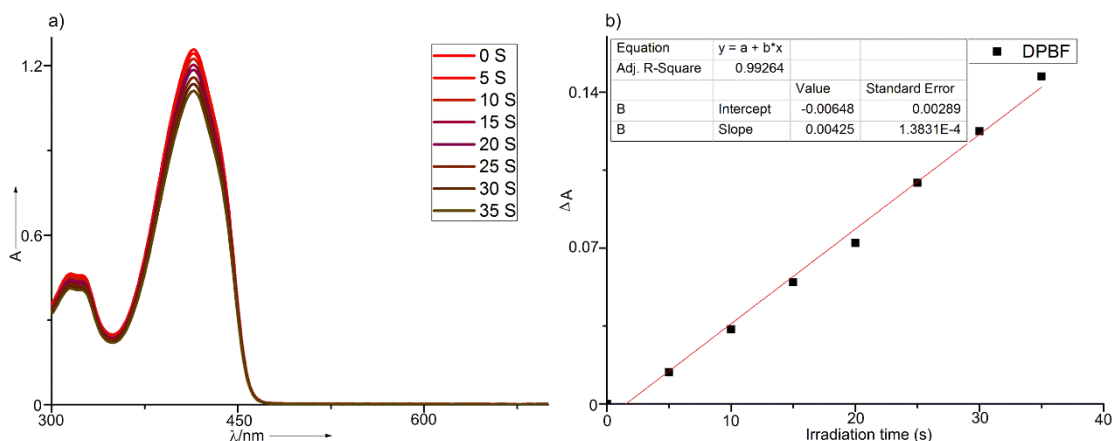

**Figure S79** Changes in the absorption spectra of **DPBF** ( $6.3 \times 10^{-5}$  mol/L) at 414 nm upon irradiation ( $\lambda_{\text{irr}} = 450\text{-}460$  nm). b) Plot of change in absorbance of **DPBF** at 414 nm vs irradiation time.

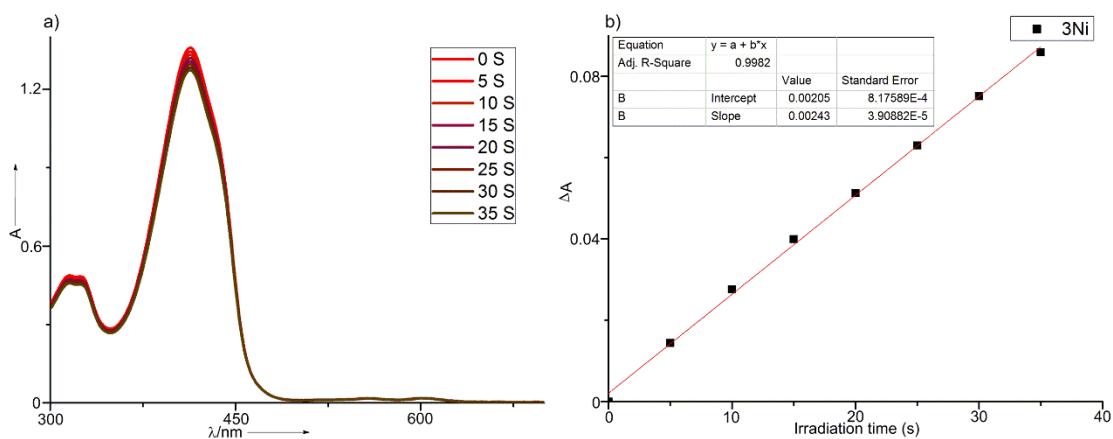

**Figure S80** Changes in the absorption spectra of **DPBF** ( $6.3 \times 10^{-5}$  mol/L) at 413 nm upon irradiation ( $\lambda_{\text{irr}} = 450\text{-}460$  nm) in the presence of **3Ni** ( $1.3 \times 10^{-6}$  mol/L). b) Plot of change in absorbance of **DPBF** at 413 nm vs irradiation time in the presence of **3Ni**.

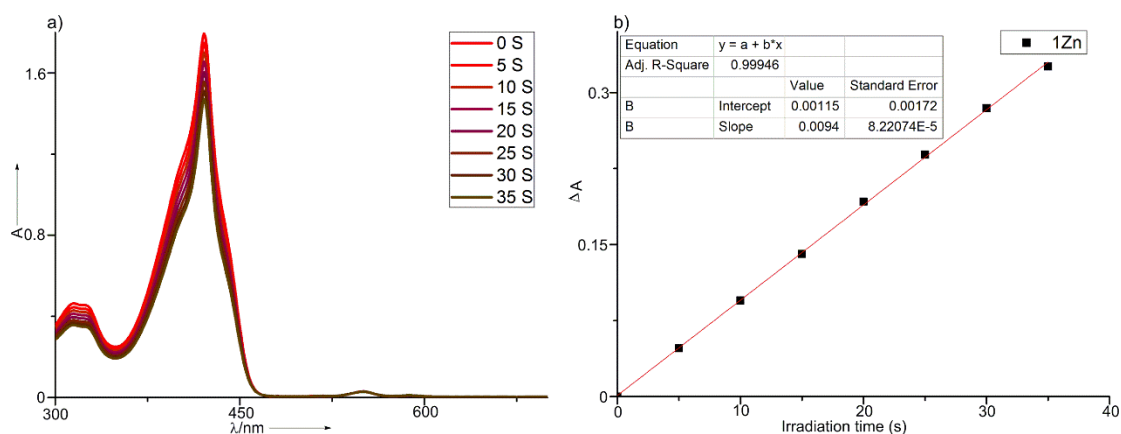

**Figure S81** Changes in the absorption spectra of **DPBF** ( $6.3 \times 10^{-5}$  mol/L) at 421 nm upon irradiation ( $\lambda_{\text{irr}} = 450\text{-}460$  nm) in the presence of **1Zn** ( $1.3 \times 10^{-6}$  mol/L). b) Plot of change in absorbance of **DPBF** at 421 nm vs irradiation time in the presence of **1Zn**.



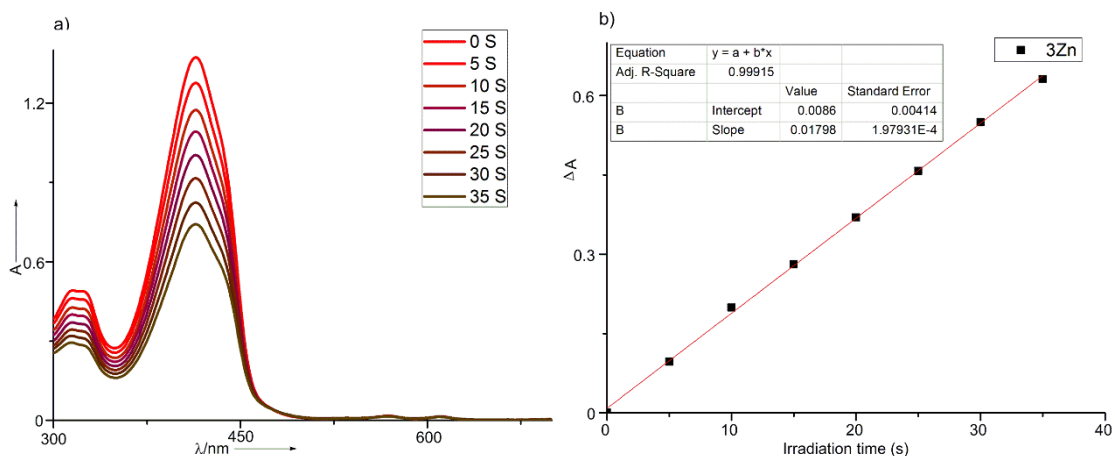

**Figure S82.** a) Changes in the absorption spectra of **DPBF** ( $6.3 \times 10^{-5}$  mol/L) at 414 nm upon irradiation ( $\lambda_{\text{irr}} = 450\text{-}460$  nm) in the presence of **3Zn** ( $1.3 \times 10^{-6}$  mol/L). b) Plot of change in absorbance of **DPBF** at 414 nm vs irradiation time in the presence of **3Zn**.

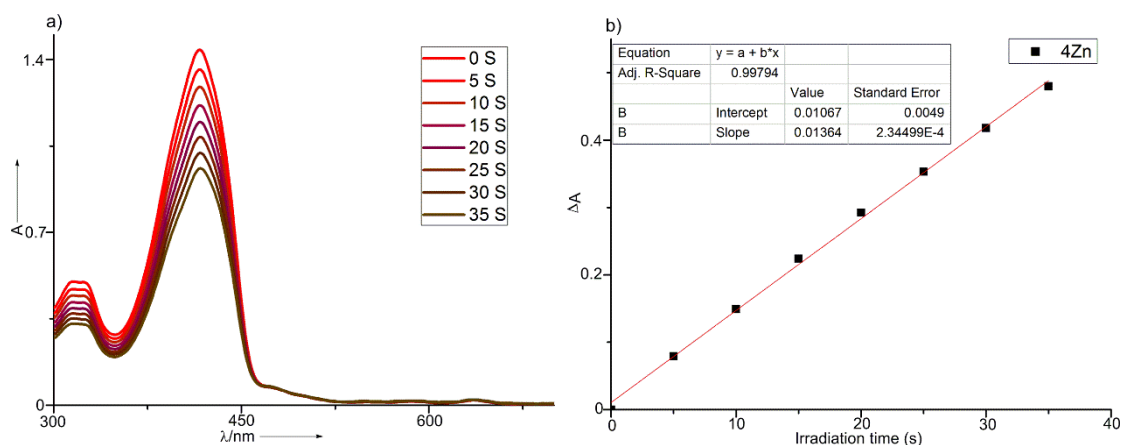

**Figure S83.** a) Changes in the absorption spectra of **DPBF** ( $6.3 \times 10^{-5}$  mol/L) at 417 nm upon irradiation ( $\lambda_{\text{irr}} = 450\text{-}460$  nm) in the presence of **4Zn** ( $1.3 \times 10^{-6}$  mol/L). b) Plot of change in absorbance of **DPBF** at 417 nm vs irradiation time in the presence of **4Zn**.

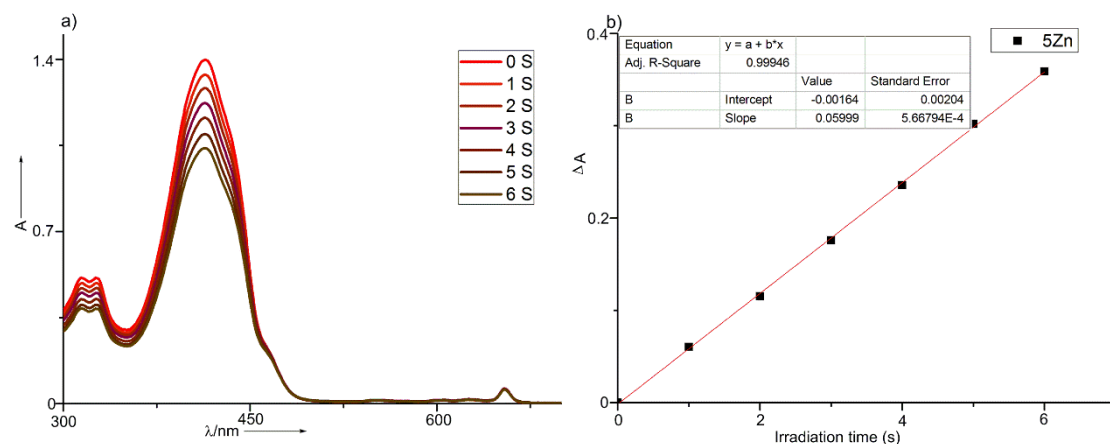

**Figure S84.** a) Changes in the absorption spectra of **DPBF** ( $6.3 \times 10^{-5}$  mol/L) at 414 nm upon irradiation ( $\lambda_{\text{irr}} = 450\text{-}460$  nm) in the presence of **5Zn** ( $1.3 \times 10^{-6}$  mol/L). b) Plot of change in absorbance of **DPBF** at 414 nm vs irradiation time in the presence of **5Zn**.

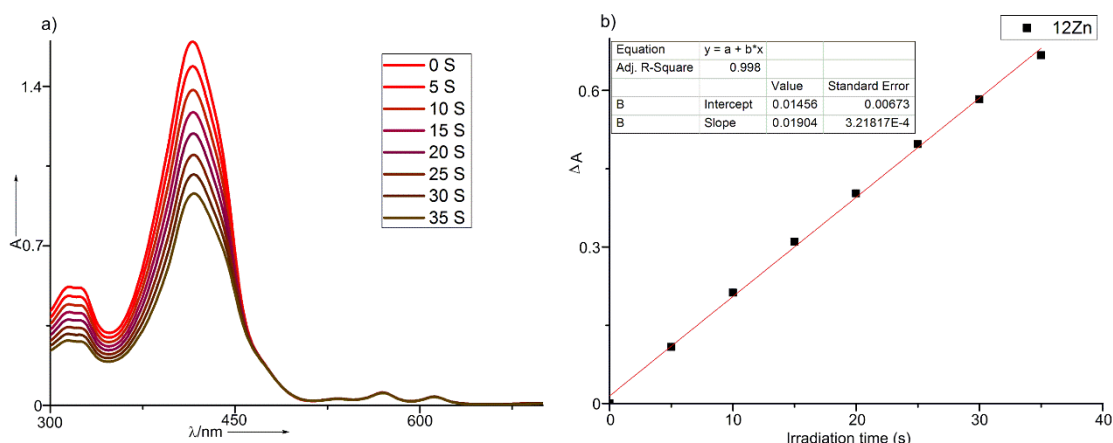

**Figure S85.** a) Changes in the absorption spectra of **DPBF** ( $6.3 \times 10^{-5}$  mol/L) at 416 nm upon irradiation ( $\lambda_{\text{irr}} = 450\text{-}460$  nm) in the presence of **12Zn** ( $1.3 \times 10^{-6}$  mol/L). b) Plot of change in absorbance of **DPBF** at 414 nm vs irradiation time in the presence of **12Zn**.

### **Electrocatalytic Hydrogen Evolution Reaction**

1.0 mg of rGO was mixed with 1 mL of isopropyl alcohol containing 0.2% nafion and the mixture sonicated in an ultrasonic bath for 30 min to produce a homogeneous mixture of concentration 1 mg/mL. The surface of the glassy carbon electrode (GCE) was polished with 0.05  $\mu\text{m}$  alumina and rinsed with doubly distilled water in the ultrasonic bath to remove any adhered  $\text{Al}_2\text{O}_3$  particles. The electrodes were rinsed with ethanol and dried under room temperature for ca. 5 min. Three 3  $\mu\text{L}$  of the rGO/isopropyl alcohol/nafion suspensions were drop cast on the surface of the GC electrode and allowed to dry at room temperature. 10  $\mu\text{L}$  aliquots of 0.2 mM dichloromethane solutions of **3Ni** to **10Ni** and **12Ni** were added dropwise to the rGO/nafion-coated electrodes and dried at room temperature for 1 h. The electrodes were stored in MilliQ water in the dark.

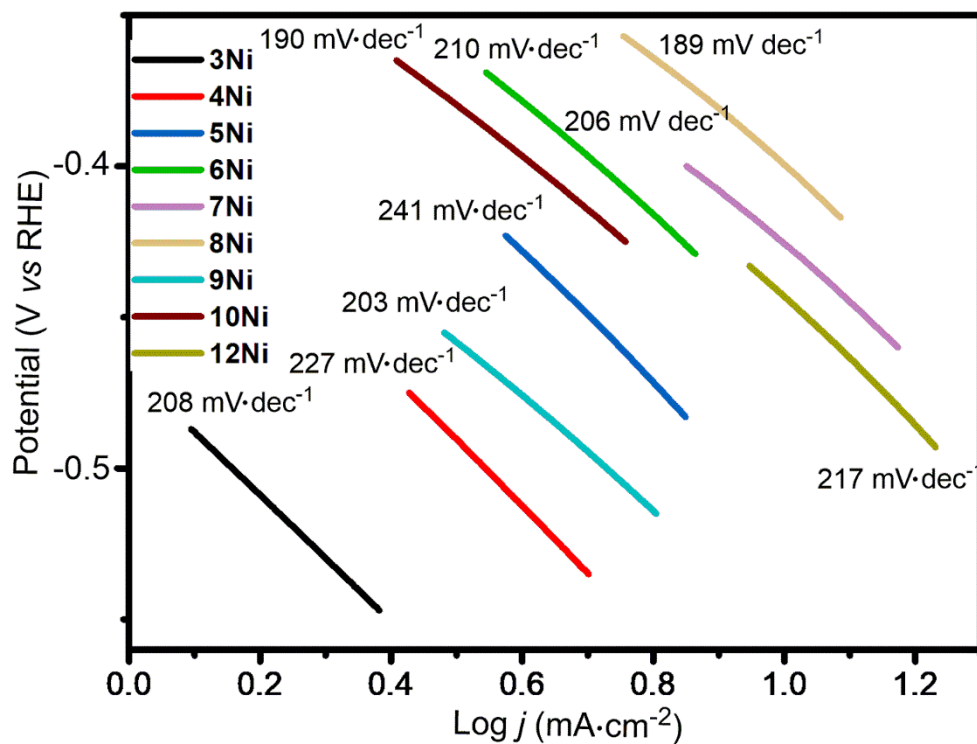

Figure S86. Calculated Tafel slopes of 3Ni/rGO to 10Ni/rGO and 12Ni/rGO.

Table S10. Onset potentials and Tafel slope values of 3Ni/rGO to 10Ni/rGO and 12Ni/rGO

| Compound              | 3Ni  | 4Ni  | 5Ni  | 6Ni  | 7Ni  | 8Ni  | 9Ni  | 10Ni | 12Ni |
|-----------------------|------|------|------|------|------|------|------|------|------|
| Onset Potentials (mV) | -450 | -380 | -315 | -295 | -293 | -262 | -377 | -300 | -291 |
| Tafel Slops (mV/dec)  | 208  | 227  | 241  | 210  | 206  | 189  | 203  | 190  | 217  |

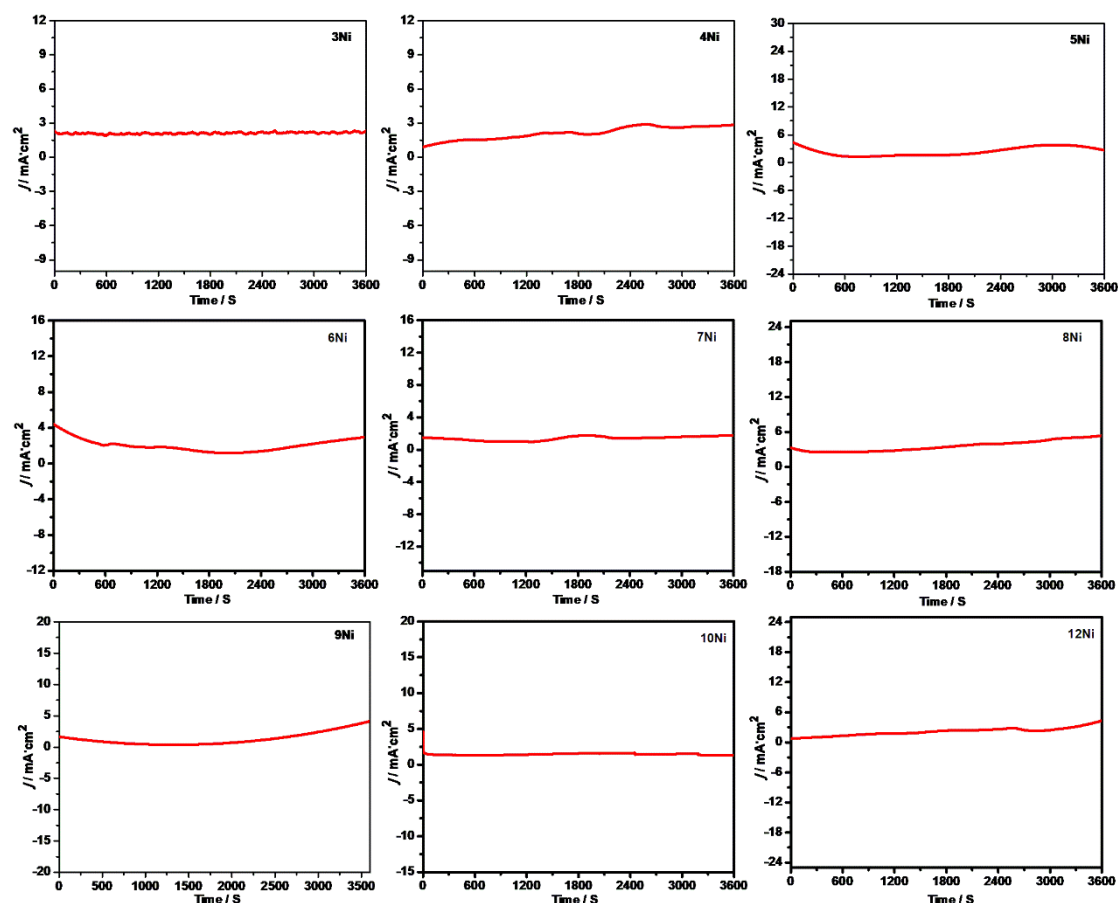

Figure S87. *i-t* curves of 3Ni/rGO to 10Ni/rGO and 12Ni/rGO in 0.5 M H<sub>2</sub>SO<sub>4</sub>.

## References

- [1] (a) K.-L. Li, C.-C. Guo and Q.-Y. Chen, Efficient one-pot regioselective synthesis of 2,3-dibromo-5,10,15,20-tetra-arylporphyrins from 5,10,15,20-tetraarylchlorins, *Synlett*, 2009, 2867-2871; (b) R. Deshpande, L. Jiang, G. Schmidt, J. Rakovan, X Wang, K. Wheeler and H. Wang, A concise approach to the synthesis of opp-dibenzoporphyrins through the Heck reaction, *Org. Lett.*, 2009, **11**, 4251-4253; (c) L. Jiang, R. A. Zaenglein, J. T. Engle, C. Mittal, C. S. Hartley, C. J. Ziegler and H. Wang, Water-soluble ionic benzoporphyrins, *Chem. Commun.*, 2012, **48**, 6927-6929.
- [2] (a) N. G. White and M. J. MacLachlan, Soluble tetraaminotriptycene precursors, *J. Org. Chem.*, 2015, **80**, 8390-8397; (b) J. H. Chong and M. J. MacLachlan, Robust non-interpenetrating coordination frameworks from new shape-persistent building blocks, *Inorg. Chem.*, 2006, **45**, 1442-1444; (c) M. Mastalerz, S. Sieste, M. Ceninć and I. M Oppel, Two-step synthesis of hexaammonium triptycene: an air-stable building block for condensation reactions to extended

tritycene derivatives, *J. Org. Chem.*, 2011, **76**, 6389-6391.

[3] (a) T. Khoury and M. J. Crossley, A strategy for the stepwise ring annulation of all four pyrrolic rings of a porphyrin, *Chem. Commun.*, 2007, 4851-4853; (b) M. J. Crossley, C. S. Sheehan, T. Khoury, J. R. Reimers and P. J. Sentic, Construction of building blocks for extended porphyrin arrays by nitration of porphyrin-2,3-diones and quinoxalino[2,3-b]porphyrins, *New J. Chem.*, 2008, **32**, 340-352.

[4] O. V. Dolomanov, L. J. Bourhis, R. J. Gildea, J. A. K. Howard and H. Puschmann, OLEX2: A complete structure solution, refinement and analysis program *J. Appl. Cryst.*, 2009, **42**, 339-341.

[5] L. J. Bourhis, O. V. Dolomanov, R. J. Gildea, J. A. K. Howard and H. Puschmann, The anatomy of a comprehensive constrained, restrained refinement program for the modern computing environment-Olex2 dissected, *Acta Cryst.*, 2015, **A71**, 59-75.

[6] G. M. Sheldrick, Crystal structure refinement with SHELXL *Acta Cryst.*, 2015, **C71**, 3-8.
